# Supplementary material for: System analysis identifies distinct and common functional networks governed by transcription factor ASCL1, in glioma and small cell lung cancer
Source: Royal Society of Chemistry journal article supplement (doi:10.1039/c6mb00851h), 2017-05-18
Supplement: c6mb00851h1.zip [file c6mb00851h1.zip]

Archive with 15 entries (15 files):
- Supplementary_Figures.pdf
- Supplementary_Table_S1.xlsx
- Supplementary_Table_S10.xlsx
- Supplementary_Table_S11.xlsx
- Supplementary_Table_S12.xlsx
- Supplementary_Table_S13.xlsx
- Supplementary_Table_S14.xlsx
- Supplementary_Table_S2.xlsx
- Supplementary_Table_S3.xlsx
- Supplementary_Table_S4.xlsx
- Supplementary_Table_S5.xlsx
- Supplementary_Table_S6.xlsx
- Supplementary_Table_S7.xlsx
- Supplementary_Table_S8.xlsx
- Supplementary_Table_S9.xlsx
