# Supplementary material for: System analysis identifies distinct and common functional networks governed by transcription factor ASCL1, in glioma and small cell lung cancer
Source: Royal Society of Chemistry journal article supplement (doi:10.1039/c6mb00851h), 2017-05-18
Supplement: c6mb00851h1.zip [file c6mb00851h1.zip › Supplementary_Table_S1.xlsx]

## Sheet: Glioma DEGS Table S1
Supplementary Table S1: 590 differentially expressed genes upon ASCL1 silencing in glioma ( Fold change 2 (log2 FC1) )
AffyID	Genes	Log2 fold change	Regulation	p-value	q-value
100505635_at	LOC100505635	10.2469	Up	9.65e-05	0.002
9340_at	GLP2R	10.0008	Up	0.000238467	0.003
442028_at	LOC442028	9.81141	Up	1.96e-05	0.001
201140_at	DHRS7C	9.62016	Up	2.5e-05	0.001
730249_at	IRG1	3.69387	Up	0.000529956	0.003
7056_at	THBD	3.16671	Up	3.53e-05	0.001
11082_at	ESM1	3.14943	Up	0.000591035	0.003
5055_at	SERPINB2	2.92995	Up	2.43e-05	0.001
574414_at	PRR9	2.64256	Up	2.66e-05	0.001
6364_at	CCL20	2.41703	Up	0.00160553	0.005
337878_at	KRTAP7-1	2.21549	Up	0.000213836	0.003
3976_at	LIF	2.10537	Up	1.31e-05	0.001
6700_at	SPRR2A	2.07002	Up	6.59e-05	0.002
150677_at	OTOS	2.05047	Up	0.0159252	0.016
7276_at	TTR	1.99694	Up	0.000756903	0.004
3037_at	HAS2	1.92293	Up	0.000465509	0.003
554226_at	ANKRD30BL	1.90207	Up	0.00827765	0.011
29114_at	TAGLN3	1.80824	Up	5.91e-05	0.002
83844_at	USP26	1.7695	Up	0.00221736	0.006
11262_at	SP140	1.76869	Up	0.00104712	0.004
1208_at	CLPS	1.76854	Up	0.00261547	0.006
11199_at	ANXA10	1.75307	Up	0.0104097	0.013
729582_at	DIRC3	1.7473	Up	0.000473924	0.003
124044_at	SPATA2L	1.74727	Up	0.00130941	0.005
81851_at	KRTAP1-1	1.71819	Up	0.00224183	0.006
1440_at	CSF3	1.6979	Up	0.000135593	0.003
9934_at	P2RY14	1.67755	Up	0.012321	0.014
144742_at	LOC144742	1.61166	Up	0.0105316	0.013
100506049_at	LRRC72	1.60603	Up	0.0067291	0.01
2825_at	GPR1	1.58931	Up	0.0141305	0.015
730755_at	KRTAP2-3	1.55181	Up	0.00355563	0.007
200316_at	APOBEC3F	1.54453	Up	0.00655382	0.01
84624_at	FNDC1	1.535	Up	0.0064767	0.01
79669_at	C3orf52	1.51341	Up	7.6e-05	0.002
8877_at	SPHK1	1.49074	Up	0.000941076	0.004
26525_at	IL36RN	1.49024	Up	0.00038805	0.003
56342_at	PPAN	1.48666	Up	0.000217938	0.003
84612_at	PARD6B	1.47873	Up	0.000732094	0.004
23764_at	MAFF	1.46874	Up	0.000349068	0.003
65263_at	PYCRL	1.45841	Up	0.00127326	0.005
5266_at	PI3	1.4381	Up	0.00098052	0.004
79643_at	CHMP6	1.43425	Up	0.00167975	0.005
150094_at	SIK1	1.43288	Up	0.000153303	0.003
100009676_at	LOC100009676	1.4225	Up	0.00937768	0.012
10262_at	SF3B4	1.40905	Up	0.000460635	0.003
92345_at	NAF1	1.40514	Up	0.000552606	0.003
285735_at	LINC00326	1.39863	Up	0.00447484	0.008
1133_at	CHRM5	1.39368	Up	0.000227386	0.003
9953_at	HS3ST3B1	1.3852	Up	0.0128144	0.015
9370_at	ADIPOQ	1.38263	Up	0.0127181	0.014
54429_at	TAS2R5	1.37329	Up	0.00288684	0.006
114043_at	C21orf90	1.37292	Up	0.00852583	0.011
29126_at	CD274	1.36562	Up	0.00020958	0.003
375387_at	LRRC33	1.36434	Up	0.00127733	0.005
11009_at	IL24	1.36342	Up	0.0143997	0.015
23519_at	ANP32D	1.35182	Up	0.00452497	0.008
51686_at	OAZ3	1.35016	Up	0.00178659	0.005
3553_at	IL1B	1.34768	Up	0.000525206	0.003
89883_at	OR6W1P	1.34351	Up	0.00770018	0.011
79949_at	PLEKHS1	1.33926	Up	0.00574319	0.009
55262_at	C7orf43	1.33041	Up	0.00326264	0.007
83743_at	GRWD1	1.30908	Up	0.00331985	0.007
5239_at	PGM5	1.30876	Up	0.0110253	0.013
84541_at	KBTBD8	1.30533	Up	0.00548329	0.009
193629_at	LINC00189	1.30484	Up	0.0125706	0.014
100506999_at	LOC100506999	1.28808	Up	0.0143623	0.015
100506661_at	LOC100506661	1.28431	Up	0.000531262	0.003
993_at	CDC25A	1.28358	Up	0.000329708	0.003
255193_at	CSNK1G2-AS1	1.28059	Up	0.00246378	0.006
6522_at	SLC4A2	1.27816	Up	0.000418187	0.003
81931_at	ZNF93	1.26788	Up	0.0106279	0.013
3952_at	LEP	1.25957	Up	0.00279379	0.006
100359394_at	LINC00102	1.25779	Up	0.00293142	0.006
57469_at	PNMAL2	1.25508	Up	0.0129902	0.015
400745_at	SH2D5	1.25067	Up	0.000948226	0.004
10570_at	DPYSL4	1.24987	Up	0.00142201	0.005
4948_at	OCA2	1.24244	Up	0.00849055	0.011
54578_at	UGT1A6	1.24114	Up	0.000270066	0.003
201799_at	TMEM154	1.23825	Up	0.00177883	0.005
125476_at	INO80C	1.23559	Up	0.000237004	0.003
80775_at	TMEM177	1.23093	Up	0.000551502	0.003
7262_at	PHLDA2	1.22796	Up	0.000734999	0.004
4084_at	MXD1	1.22508	Up	0.00114613	0.004
2354_at	FOSB	1.22385	Up	0.0128762	0.015
4199_at	ME1	1.209	Up	0.0160904	0.016
494143_at	CHAC2	1.20426	Up	0.00359217	0.007
5271_at	SERPINB8	1.19622	Up	0.0017839	0.005
9047_at	SH2D2A	1.1906	Up	0.0143744	0.015
5407_at	PNLIPRP1	1.18162	Up	0.012085	0.014
84619_at	ZGPAT	1.18133	Up	0.00284331	0.006
80789_at	INTS5	1.17397	Up	0.013176	0.015
100507297_at	TMEM44-AS1	1.17141	Up	0.00156079	0.005
80176_at	SPSB1	1.17022	Up	0.000605533	0.003
342371_at	ATXN1L	1.1631	Up	0.000924734	0.004
56106_at	PCDHGA10	1.15486	Up	0.00544514	0.009
1050_at	CEBPA	1.15455	Up	0.00416304	0.008
79983_at	POF1B	1.15332	Up	0.00617245	0.01
898_at	CCNE1	1.146	Up	0.000855201	0.004
201163_at	FLCN	1.14473	Up	0.00124793	0.005
83882_at	TSPAN10	1.14352	Up	0.00149067	0.005
1118_at	CHIT1	1.1429	Up	0.00483303	0.009
25786_at	DGCR11	1.13511	Up	0.00300245	0.006
375449_at	MAST4	1.13014	Up	0.000721667	0.004
6573_at	SLC19A1	1.12537	Up	0.00292287	0.006
51129_at	ANGPTL4	1.1252	Up	0.00050123	0.003
84948_at	TIGD5	1.11807	Up	0.00584281	0.009
64750_at	SMURF2	1.11803	Up	0.00221535	0.006
130497_at	OSR1	1.10934	Up	0.00210387	0.006
1497_at	CTNS	1.10817	Up	0.000597375	0.003
144097_at	C11orf84	1.10797	Up	0.000615326	0.003
26145_at	IRF2BP1	1.10455	Up	0.0104164	0.013
10938_at	EHD1	1.09675	Up	0.00158563	0.005
140686_at	WFDC3	1.08988	Up	0.00154895	0.005
9966_at	TNFSF15	1.08621	Up	0.00178776	0.005
100507477_at	LOC100507477	1.07978	Up	0.00357604	0.007
50814_at	NSDHL	1.07887	Up	0.00385571	0.008
28991_at	COMMD5	1.07166	Up	0.00279726	0.006
6332_at	SCN7A	1.06857	Up	0.0145731	0.015
84775_at	ZNF607	1.06602	Up	0.013736	0.015
51700_at	CYB5R2	1.06554	Up	0.013324	0.015
3484_at	IGFBP1	1.06336	Up	0.00134146	0.005
645591_at	LHFPL3-AS1	1.06159	Up	0.00227517	0.006
29916_at	SNX11	1.05889	Up	0.0027418	0.006
9069_at	CLDN12	1.05767	Up	0.000989001	0.004
79874_at	RABEP2	1.05492	Up	0.0068824	0.01
4745_at	NELL1	1.05243	Up	0.0030827	0.007
9986_at	RCE1	1.03708	Up	0.000528223	0.003
84444_at	DOT1L	1.03225	Up	0.0107148	0.013
83475_at	DOHH	1.02755	Up	0.00832135	0.011
79943_at	ZNF696	1.02697	Up	0.0119143	0.014
100287902_at	LGALS8-AS1	1.02528	Up	0.0142404	0.015
84305_at	WIBG	1.02434	Up	0.00103498	0.004
79724_at	ZNF768	1.02374	Up	0.00646345	0.01
29841_at	GRHL1	1.01998	Up	0.00520457	0.009
139170_at	DCAF12L1	1.01817	Up	0.0053576	0.009
1595_at	CYP51A1	1.0164	Up	0.0128847	0.015
64922_at	LRRC19	1.01485	Up	0.0106481	0.013
2566_at	GABRG2	1.0143	Up	0.0108221	0.013
23219_at	FBXO28	1.01233	Up	0.00122345	0.005
127700_at	OSCP1	1.00956	Up	0.00339481	0.007
170394_at	PWWP2B	1.0074	Up	0.00315021	0.007
9314_at	KLF4	-1.00127	Down	0.00206146	0.006
407026_at	MIR29C	-1.00277	Down	0.00695098	0.01
55740_at	ENAH	-1.00538	Down	0.00153383	0.005
55088_at	C10orf118	-1.00558	Down	0.0164404	0.017
100505761_at	LOC100505761	-1.00623	Down	0.00836672	0.011
57575_at	PCDH10	-1.00642	Down	0.00715165	0.01
80765_at	STARD5	-1.00677	Down	0.00462119	0.008
117178_at	SSX2IP	-1.01274	Down	0.00762379	0.011
83787_at	ARMC10	-1.01331	Down	0.0117432	0.014
84168_at	ANTXR1	-1.01429	Down	0.00559093	0.009
117248_at	GALNTL2	-1.01564	Down	0.00106438	0.004
1016_at	CDH18	-1.0161	Down	0.00605193	0.01
51474_at	LIMA1	-1.01704	Down	0.00461532	0.008
6238_at	RRBP1	-1.01852	Down	0.00218424	0.006
6252_at	RTN1	-1.02105	Down	0.0024211	0.006
26960_at	NBEA	-1.02111	Down	0.0146164	0.015
90488_at	C12orf23	-1.02148	Down	0.0153836	0.016
5836_at	PYGL	-1.02191	Down	0.0134328	0.015
4782_at	NFIC	-1.02683	Down	0.00521076	0.009
219743_at	TYSND1	-1.02775	Down	0.0041529	0.008
118490_at	MSS51	-1.02794	Down	0.0164737	0.017
23023_at	TMCC1	-1.02951	Down	0.00750848	0.011
22906_at	TRAK1	-1.03016	Down	0.00591231	0.01
4601_at	MXI1	-1.03245	Down	0.0119495	0.014
9559_at	VPS26A	-1.0334	Down	0.00415667	0.008
8087_at	FXR1	-1.03376	Down	0.00700951	0.01
4854_at	NOTCH3	-1.03487	Down	0.00269024	0.006
3339_at	HSPG2	-1.0349	Down	0.00122088	0.005
56164_at	STK31	-1.03555	Down	0.00128889	0.005
4781_at	NFIB	-1.03573	Down	0.00193548	0.005
8671_at	SLC4A4	-1.03632	Down	0.0147089	0.015
2138_at	EYA1	-1.03637	Down	0.00380861	0.008
100507547_at	LOC100507547	-1.03668	Down	0.00243585	0.006
9055_at	PRC1	-1.03816	Down	0.000612799	0.003
29995_at	LMCD1	-1.03967	Down	0.0040916	0.008
196_at	AHR	-1.04103	Down	0.00605311	0.01
283404_at	LINC00592	-1.04187	Down	0.00189212	0.005
23768_at	FLRT2	-1.04191	Down	0.00590863	0.01
120_at	ADD3	-1.04229	Down	0.00442175	0.008
286_at	ANK1	-1.04496	Down	0.000807434	0.004
4026_at	LPP	-1.04613	Down	0.000699756	0.004
162681_at	C18orf54	-1.04807	Down	0.00907895	0.012
4133_at	MAP2	-1.0499	Down	0.0129542	0.015
4091_at	SMAD6	-1.05126	Down	0.00343324	0.007
22870_at	PPP6R1	-1.05337	Down	0.0136992	0.015
4052_at	LTBP1	-1.05557	Down	0.00275785	0.006
55132_at	LARP1B	-1.05706	Down	0.0133303	0.015
6938_at	TCF12	-1.05738	Down	0.00692602	0.01
2294_at	FOXF1	-1.05749	Down	0.000621396	0.003
64784_at	CRTC3	-1.05825	Down	0.000528208	0.003
3800_at	KIF5C	-1.06032	Down	0.00294739	0.006
23236_at	PLCB1	-1.06464	Down	0.00456558	0.008
7421_at	VDR	-1.06469	Down	0.000564494	0.003
390980_at	ZNF805	-1.065	Down	0.0105468	0.013
116151_at	FAM210B	-1.06537	Down	0.0114835	0.014
6507_at	SLC1A3	-1.06546	Down	0.00126167	0.005
54843_at	SYTL2	-1.06937	Down	0.00864448	0.012
26289_at	AK5	-1.06993	Down	0.00144839	0.005
55599_at	RNPC3	-1.07167	Down	0.00956629	0.012
54554_at	WDR5B	-1.07224	Down	0.0119251	0.014
89866_at	SEC16B	-1.07332	Down	0.00248625	0.006
1602_at	DACH1	-1.07502	Down	0.00291691	0.006
90417_at	C15orf23	-1.07537	Down	0.00691959	0.01
6654_at	SOS1	-1.07558	Down	0.00791879	0.011
445_at	ASS1	-1.07713	Down	0.00714154	0.01
403313_at	PPAPDC2	-1.0785	Down	0.0112723	0.014
3400_at	ID4	-1.08176	Down	0.0117673	0.014
219771_at	CCNY	-1.08483	Down	0.00225393	0.006
6304_at	SATB1	-1.08872	Down	0.00143215	0.005
1058_at	CENPA	-1.08927	Down	0.00140209	0.005
1244_at	ABCC2	-1.08945	Down	0.00374294	0.007
1879_at	EBF1	-1.09048	Down	0.00117278	0.004
643641_at	ZNF862	-1.09164	Down	0.0035144	0.007
158038_at	LINGO2	-1.0921	Down	0.00529069	0.009
56987_at	BBX	-1.09377	Down	0.00906056	0.012
26040_at	SETBP1	-1.09432	Down	0.00267797	0.006
79009_at	DDX50	-1.09463	Down	0.013718	0.015
3832_at	KIF11	-1.09639	Down	0.0121918	0.014
10645_at	CAMKK2	-1.09733	Down	0.00079954	0.004
79589_at	RNF128	-1.09943	Down	0.00508565	0.009
85315_at	PAQR8	-1.10027	Down	0.00786217	0.011
196528_at	ARID2	-1.10139	Down	0.00652469	0.01
84851_at	TRIM52	-1.10232	Down	0.010161	0.013
7020_at	TFAP2A	-1.10364	Down	0.000941104	0.004
160518_at	DENND5B	-1.10409	Down	0.0152012	0.016
65055_at	REEP1	-1.10849	Down	0.0056478	0.009
2308_at	FOXO1	-1.10991	Down	0.00161278	0.005
205717_at	KIAA2018	-1.11125	Down	0.0048572	0.009
160335_at	TMTC2	-1.11219	Down	0.0136547	0.015
1303_at	COL12A1	-1.1123	Down	0.00275451	0.006
84886_at	C1orf198	-1.11623	Down	0.0131672	0.015
84525_at	HOPX	-1.11957	Down	0.00731621	0.011
23621_at	BACE1	-1.11974	Down	0.000394012	0.003
286144_at	TRIQK	-1.1201	Down	0.00753279	0.011
79633_at	FAT4	-1.12475	Down	0.00669301	0.01
56474_at	CTPS2	-1.12476	Down	0.00779468	0.011
140688_at	C20orf112	-1.12695	Down	0.00559387	0.009
57678_at	GPAM	-1.13023	Down	0.00478272	0.008
10673_at	TNFSF13B	-1.13039	Down	0.0055147	0.009
55809_at	TRERF1	-1.13067	Down	0.00101498	0.004
66000_at	TMEM108	-1.13621	Down	0.00179971	0.005
378938_at	MALAT1	-1.13839	Down	0.00857712	0.012
83463_at	MXD3	-1.13965	Down	0.00147335	0.005
219539_at	YPEL4	-1.1416	Down	0.000454211	0.003
64093_at	SMOC1	-1.14235	Down	0.000423985	0.003
85025_at	TMEM60	-1.14405	Down	0.0126686	0.014
221184_at	CPNE2	-1.14464	Down	0.00182249	0.005
10735_at	STAG2	-1.1452	Down	0.00800956	0.011
114899_at	C1QTNF3	-1.14751	Down	0.0105074	0.013
50807_at	ASAP1	-1.14826	Down	0.00153187	0.005
55273_at	TMEM100	-1.14875	Down	0.00197367	0.005
646_at	BNC1	-1.15077	Down	0.00793557	0.011
164237_at	WFDC13	-1.15158	Down	0.00224183	0.006
78991_at	PCYOX1L	-1.15308	Down	0.00509862	0.009
115811_at	IQCD	-1.15323	Down	0.00823388	0.011
25825_at	BACE2	-1.1563	Down	0.00711493	0.01
28984_at	RGCC	-1.15665	Down	0.0018278	0.005
222166_at	C7orf41	-1.15703	Down	0.00386616	0.008
84959_at	UBASH3B	-1.15726	Down	0.00356607	0.007
222161_at	DKFZP586I1420	-1.15757	Down	0.0101832	0.013
3600_at	IL15	-1.15824	Down	0.00143159	0.005
27163_at	NAAA	-1.15827	Down	0.0126511	0.014
84274_at	COQ5	-1.16026	Down	0.00470826	0.008
23376_at	UFL1	-1.1605	Down	0.00463547	0.008
477_at	ATP1A2	-1.16503	Down	0.00138615	0.005
55366_at	LGR4	-1.16564	Down	0.0065306	0.01
400931_at	MIRLET7BHG	-1.16576	Down	0.00964989	0.012
23052_at	ENDOD1	-1.16597	Down	0.010206	0.013
51203_at	NUSAP1	-1.16974	Down	0.00128578	0.005
337876_at	CHSY3	-1.1702	Down	0.00847608	0.011
2737_at	GLI3	-1.17048	Down	0.0005515	0.003
202_at	AIM1	-1.17261	Down	0.000715487	0.004
1301_at	COL11A1	-1.17327	Down	0.00720693	0.01
343990_at	KIAA1211L	-1.17333	Down	0.000689375	0.004
6310_at	ATXN1	-1.1735	Down	0.0114211	0.014
114907_at	FBXO32	-1.17352	Down	0.00811027	0.011
4837_at	NNMT	-1.17615	Down	0.000425322	0.003
9886_at	RHOBTB1	-1.17719	Down	0.00946605	0.012
54796_at	BNC2	-1.17926	Down	0.0133786	0.015
1306_at	COL15A1	-1.18088	Down	0.00395299	0.008
646903_at	LOC646903	-1.18826	Down	0.00138032	0.005
150384_at	CN5H6.4	-1.18832	Down	0.00203088	0.005
10892_at	MALT1	-1.19316	Down	0.00626372	0.01
113612_at	CYP2U1	-1.19569	Down	0.0100117	0.013
3236_at	HOXD10	-1.19957	Down	0.00222052	0.006
9522_at	SCAMP1	-1.2055	Down	0.00596529	0.01
5167_at	ENPP1	-1.20553	Down	0.00145592	0.005
730101_at	LOC730101	-1.2059	Down	0.00250652	0.006
9037_at	SEMA5A	-1.20674	Down	0.000675781	0.004
10420_at	TESK2	-1.20838	Down	0.01073	0.013
5764_at	PTN	-1.20841	Down	0.0170091	0.017
678_at	ZFP36L2	-1.20935	Down	0.00348866	0.007
8408_at	ULK1	-1.22121	Down	0.0109002	0.013
214_at	ALCAM	-1.22231	Down	0.00213655	0.006
55227_at	LRRC1	-1.22237	Down	0.00311546	0.007
23243_at	ANKRD28	-1.22308	Down	0.00602573	0.01
286046_at	XKR6	-1.22774	Down	0.0122473	0.014
55837_at	EAPP	-1.2281	Down	0.00443939	0.008
357_at	SHROOM2	-1.22815	Down	0.00145227	0.005
253943_at	YTHDF3	-1.22956	Down	0.00766785	0.011
4184_at	SMCP	-1.22976	Down	0.00702923	0.01
84870_at	RSPO3	-1.23003	Down	0.00423466	0.008
6943_at	TCF21	-1.23017	Down	0.00530507	0.009
1903_at	S1PR3	-1.23109	Down	0.000818637	0.004
4005_at	LMO2	-1.23196	Down	0.0170877	0.017
995_at	CDC25C	-1.23208	Down	0.000765985	0.004
51804_at	SIX4	-1.23319	Down	0.00231468	0.006
100132707_at	LOC100132707	-1.23422	Down	0.00919252	0.012
3613_at	IMPA2	-1.23621	Down	0.00582399	0.009
2058_at	EPRS	-1.23726	Down	0.00720611	0.01
6788_at	STK3	-1.2379	Down	0.00508013	0.009
23126_at	POGZ	-1.23804	Down	0.0033574	0.007
57568_at	SIPA1L2	-1.23826	Down	0.00241867	0.006
26586_at	CKAP2	-1.24023	Down	0.00423174	0.008
90102_at	PHLDB2	-1.24163	Down	0.00237092	0.006
1280_at	COL2A1	-1.2425	Down	0.00184589	0.005
10194_at	TSHZ1	-1.24343	Down	0.00690789	0.01
57221_at	KIAA1244	-1.24613	Down	0.0161113	0.016
8672_at	EIF4G3	-1.24681	Down	0.00513574	0.009
9890_at	LPPR4	-1.24702	Down	0.00178713	0.005
4982_at	TNFRSF11B	-1.24736	Down	0.0119679	0.014
157556_at	C8orf56	-1.24853	Down	0.00150654	0.005
84216_at	TMEM117	-1.24923	Down	0.00848077	0.011
80830_at	APOL6	-1.24972	Down	0.00101584	0.004
23054_at	NCOA6	-1.25099	Down	0.00224516	0.006
10868_at	USP20	-1.25117	Down	0.000301046	0.003
1284_at	COL4A2	-1.25142	Down	0.000310454	0.003
114134_at	SLC2A13	-1.25413	Down	0.0145336	0.015
9863_at	MAGI2	-1.25442	Down	0.00482541	0.009
5592_at	PRKG1	-1.25457	Down	0.00486173	0.009
221_at	ALDH3B1	-1.25472	Down	0.0137249	0.015
9787_at	DLGAP5	-1.26368	Down	0.00956667	0.012
100129034_at	LOC100129034	-1.26388	Down	0.000607149	0.003
4092_at	SMAD7	-1.26593	Down	0.0122936	0.014
56946_at	C11orf30	-1.26614	Down	0.0104259	0.013
5493_at	PPL	-1.26817	Down	0.000256197	0.003
23129_at	PLXND1	-1.27012	Down	0.00131174	0.005
26036_at	ZNF451	-1.27131	Down	0.0164235	0.017
100129460_at	DPY19L1P1	-1.27231	Down	0.0116081	0.014
100287569_at	LINC00173	-1.27295	Down	0.0033615	0.007
146227_at	BEAN1	-1.27653	Down	0.000211485	0.003
2036_at	EPB41L1	-1.27948	Down	0.0002283	0.003
219654_at	ZCCHC24	-1.28058	Down	0.000127372	0.003
2257_at	FGF12	-1.28102	Down	0.00822206	0.011
9411_at	ARHGAP29	-1.2837	Down	0.00133448	0.005
10402_at	ST3GAL6	-1.2856	Down	0.00415361	0.008
10163_at	WASF2	-1.28637	Down	0.0081869	0.011
57722_at	IGDCC4	-1.2878	Down	0.00157903	0.005
57181_at	SLC39A10	-1.28893	Down	0.0138705	0.015
93653_at	ST7-AS1	-1.29121	Down	0.00247851	0.006
1950_at	EGF	-1.2922	Down	0.000465072	0.003
167691_at	LCA5	-1.2923	Down	0.00495808	0.009
51214_at	IGF2-AS	-1.29231	Down	0.00654288	0.01
2801_at	GOLGA2	-1.29286	Down	0.00749523	0.011
83604_at	TMEM47	-1.29296	Down	0.0157801	0.016
3790_at	KCNS3	-1.29444	Down	0.00182762	0.005
7871_at	SLMAP	-1.29491	Down	0.00624057	0.01
4208_at	MEF2C	-1.29782	Down	0.00225536	0.006
125875_at	CLDND2	-1.2983	Down	0.00137001	0.005
100286925_at	LOC100286925	-1.29933	Down	0.0107991	0.013
23531_at	MMD	-1.30304	Down	0.0149309	0.015
6383_at	SDC2	-1.3043	Down	0.0129426	0.015
4239_at	MFAP4	-1.3059	Down	0.00152986	0.005
7227_at	TRPS1	-1.30967	Down	0.0153531	0.016
7060_at	THBS4	-1.31115	Down	0.000181836	0.003
283174_at	LOC283174	-1.31858	Down	0.00954219	0.012
122622_at	ADSSL1	-1.31869	Down	0.000705742	0.004
91523_at	PCED1B	-1.3191	Down	0.0121083	0.014
128338_at	DRAM2	-1.32078	Down	0.00642282	0.01
3685_at	ITGAV	-1.32423	Down	0.00240107	0.006
81624_at	DIAPH3	-1.32649	Down	0.00411574	0.008
6414_at	SEPP1	-1.32912	Down	0.0170643	0.017
22858_at	ICK	-1.32973	Down	0.00187343	0.005
92689_at	FAM114A1	-1.32996	Down	0.000299796	0.003
55761_at	TTC17	-1.33017	Down	0.0092523	0.012
80114_at	BICC1	-1.33553	Down	0.00417252	0.008
3149_at	HMGB3	-1.33605	Down	0.0110174	0.013
5142_at	PDE4B	-1.33634	Down	0.00510498	0.009
28966_at	SNX24	-1.33922	Down	0.0147469	0.015
492311_at	IGIP	-1.34363	Down	0.00981775	0.013
23199_at	KIAA0182	-1.34377	Down	0.00243016	0.006
25925_at	ZNF521	-1.34383	Down	0.00665432	0.01
23118_at	TAB2	-1.3481	Down	0.00346632	0.007
88455_at	ANKRD13A	-1.35072	Down	0.000404928	0.003
3290_at	HSD11B1	-1.35237	Down	0.00690756	0.01
29123_at	ANKRD11	-1.36157	Down	0.0147323	0.015
57214_at	KIAA1199	-1.36715	Down	0.000192952	0.003
23097_at	CDK19	-1.36829	Down	0.000423289	0.003
220930_at	ZEB1-AS1	-1.37098	Down	0.00718689	0.01
100505894_at	TMEM161B-AS1	-1.3752	Down	0.0134147	0.015
100630918_at	LOC100630918	-1.37555	Down	0.000633367	0.003
29899_at	GPSM2	-1.37855	Down	0.000626614	0.003
137075_at	CLDN23	-1.3815	Down	0.000996948	0.004
7272_at	TTK	-1.38174	Down	0.0131549	0.015
94240_at	EPSTI1	-1.38193	Down	0.00498559	0.009
11098_at	PRSS23	-1.38316	Down	0.00437898	0.008
55601_at	DDX60	-1.39131	Down	0.0147199	0.015
4775_at	NFATC3	-1.39621	Down	0.0114555	0.014
1630_at	DCC	-1.39853	Down	0.00182024	0.005
2044_at	EPHA5	-1.39878	Down	0.00107774	0.004
23281_at	MTUS2	-1.40297	Down	0.00012892	0.003
2634_at	GBP2	-1.40735	Down	0.00466661	0.008
148898_at	C1orf213	-1.40776	Down	0.00581446	0.009
64798_at	DEPTOR	-1.40822	Down	0.00028864	0.003
130132_at	RFTN2	-1.40837	Down	0.00124384	0.005
10112_at	KIF20A	-1.40918	Down	9.53e-05	0.002
152503_at	SH3D19	-1.40993	Down	0.0139015	0.015
5784_at	PTPN14	-1.41059	Down	0.00283795	0.006
92270_at	ATP6AP1L	-1.41188	Down	0.00161786	0.005
11167_at	FSTL1	-1.4138	Down	0.0168352	0.017
55320_at	MIS18BP1	-1.4158	Down	0.00847122	0.011
2258_at	FGF13	-1.41823	Down	0.00524626	0.009
5337_at	PLD1	-1.42428	Down	0.00124886	0.005
7049_at	TGFBR3	-1.42429	Down	0.00868638	0.012
139818_at	DOCK11	-1.42583	Down	0.0108257	0.013
283588_at	LOC283588	-1.42603	Down	0.000292784	0.003
169792_at	GLIS3	-1.42844	Down	0.000379479	0.003
8871_at	SYNJ2	-1.42952	Down	0.0126294	0.014
100506660_at	DDX11-AS1	-1.43123	Down	0.000893555	0.004
658_at	BMPR1B	-1.43462	Down	0.00360846	0.007
89796_at	NAV1	-1.43575	Down	0.00207216	0.006
100507165_at	LOC100507165	-1.43692	Down	0.0027151	0.006
9169_at	SCAF11	-1.43705	Down	0.00298246	0.006
284611_at	FAM102B	-1.43938	Down	0.00180337	0.005
114990_at	VASN	-1.44125	Down	0.000670587	0.004
90246_at	LOC90246	-1.44738	Down	0.0108085	0.013
10512_at	SEMA3C	-1.44926	Down	0.0154445	0.016
4774_at	NFIA	-1.45052	Down	0.00110057	0.004
2820_at	GPD2	-1.45118	Down	0.00228366	0.006
1496_at	CTNNA2	-1.45918	Down	0.0121208	0.014
3418_at	IDH2	-1.46049	Down	0.0091477	0.012
10265_at	IRX5	-1.46144	Down	0.00851848	0.011
59277_at	NTN4	-1.46436	Down	0.00445625	0.008
100507557_at	LOC100507557	-1.46726	Down	0.000889406	0.004
4288_at	MKI67	-1.47284	Down	0.00107103	0.004
22861_at	NLRP1	-1.47934	Down	0.0039701	0.008
376940_at	ZC3H6	-1.48099	Down	0.00706377	0.01
2201_at	FBN2	-1.48933	Down	0.00168745	0.005
4147_at	MATN2	-1.49173	Down	0.0117121	0.014
401261_at	FLJ38717	-1.49861	Down	0.0130631	0.015
1005_at	CDH7	-1.49871	Down	0.000741018	0.004
2735_at	GLI1	-1.49927	Down	0.00384339	0.008
57511_at	COG6	-1.50051	Down	0.011705	0.014
11227_at	GALNT5	-1.50358	Down	0.000395467	0.003
103_at	ADAR	-1.50967	Down	0.000171493	0.003
8644_at	AKR1C3	-1.51589	Down	0.000137136	0.003
116372_at	LYPD1	-1.51768	Down	0.00486981	0.009
2556_at	GABRA3	-1.52685	Down	0.00427718	0.008
4778_at	NFE2	-1.52839	Down	0.00716812	0.01
29121_at	CLEC2D	-1.53017	Down	0.00814952	0.011
9126_at	SMC3	-1.53206	Down	0.0149868	0.015
727936_at	GXYLT2	-1.53314	Down	0.00052159	0.003
23452_at	ANGPTL2	-1.53506	Down	0.000102148	0.002
55835_at	CENPJ	-1.53527	Down	0.0100239	0.013
55075_at	UACA	-1.5358	Down	0.0138676	0.015
153642_at	ARSK	-1.53694	Down	0.00622627	0.01
23224_at	SYNE2	-1.54226	Down	0.012381	0.014
79822_at	ARHGAP28	-1.54324	Down	0.000614152	0.003
5159_at	PDGFRB	-1.5476	Down	0.000380574	0.003
51334_at	PRR16	-1.5499	Down	0.000441949	0.003
8654_at	PDE5A	-1.5501	Down	0.00602333	0.01
8534_at	CHST1	-1.55992	Down	0.000184897	0.003
699_at	BUB1	-1.56229	Down	0.0106654	0.013
9912_at	ARHGAP44	-1.56393	Down	0.00274669	0.006
84318_at	CCDC77	-1.5651	Down	0.014304	0.015
9499_at	MYOT	-1.56918	Down	0.000179878	0.003
158295_at	MGC24103	-1.57096	Down	0.0164983	0.017
4929_at	NR4A2	-1.57199	Down	0.00384641	0.008
57082_at	CASC5	-1.57598	Down	0.00114519	0.004
10891_at	PPARGC1A	-1.57719	Down	0.000508088	0.003
9473_at	THEMIS2	-1.58129	Down	0.0145942	0.015
115701_at	ALPK2	-1.58238	Down	0.00409302	0.008
7275_at	TUB	-1.58415	Down	0.00231622	0.006
1645_at	AKR1C1	-1.58556	Down	0.0120905	0.014
56967_at	C14orf132	-1.58655	Down	0.000703009	0.004
629_at	CFB	-1.58878	Down	0.00999743	0.013
9702_at	CEP57	-1.58934	Down	0.00231128	0.006
23704_at	KCNE4	-1.59096	Down	3.33e-05	0.001
220965_at	FAM13C	-1.59494	Down	0.00118041	0.004
6328_at	SCN3A	-1.59648	Down	0.0139904	0.015
2823_at	GPM6A	-1.59795	Down	0.00548856	0.009
259266_at	ASPM	-1.60151	Down	0.0110662	0.013
283431_at	GAS2L3	-1.60228	Down	0.00714501	0.01
27303_at	RBMS3	-1.60446	Down	0.00244795	0.006
1831_at	TSC22D3	-1.60622	Down	0.00926226	0.012
57493_at	HEG1	-1.60631	Down	0.00473368	0.008
56603_at	CYP26B1	-1.60672	Down	0.00788591	0.011
389136_at	VGLL3	-1.61413	Down	0.00192895	0.005
1261_at	CNGA3	-1.61432	Down	0.00462318	0.008
10802_at	SEC24A	-1.61655	Down	0.00119203	0.004
83591_at	THAP2	-1.61977	Down	0.0159358	0.016
8082_at	SSPN	-1.62439	Down	0.00150928	0.005
284_at	ANGPT1	-1.62528	Down	0.000763536	0.004
654_at	BMP6	-1.62677	Down	0.000400659	0.003
80321_at	CEP70	-1.62681	Down	0.00906807	0.012
29942_at	PURG	-1.62946	Down	0.0029174	0.006
100129858_at	LOC100129858	-1.63647	Down	0.000200953	0.003
2252_at	FGF7	-1.64461	Down	0.0124701	0.014
27333_at	GOLIM4	-1.65282	Down	0.0142794	0.015
11168_at	PSIP1	-1.65819	Down	0.0153181	0.016
23499_at	MACF1	-1.67286	Down	0.0144983	0.015
246175_at	CNOT6L	-1.67287	Down	0.0137223	0.015
5651_at	TMPRSS15	-1.67581	Down	0.0129327	0.015
80195_at	C10orf57	-1.67836	Down	0.0141599	0.015
54842_at	MFSD6	-1.68127	Down	0.000490653	0.003
4008_at	LMO7	-1.685	Down	7.72e-05	0.002
27250_at	PDCD4	-1.68749	Down	0.00726653	0.011
643763_at	UG0898H09	-1.6884	Down	0.000210379	0.003
375287_at	RBM43	-1.68927	Down	0.00654301	0.01
5004_at	ORM1	-1.69399	Down	0.00264966	0.006
22854_at	NTNG1	-1.69984	Down	0.0073194	0.011
728730_at	LOC728730	-1.70583	Down	0.00119703	0.004
204801_at	NLRP11	-1.72094	Down	0.00185642	0.005
11015_at	KDELR3	-1.72724	Down	0.000486925	0.003
6999_at	TDO2	-1.73286	Down	0.00670615	0.01
374946_at	DRAXIN	-1.74143	Down	0.00606766	0.01
11138_at	TBC1D8	-1.74846	Down	0.000301796	0.003
3399_at	ID3	-1.75293	Down	5.34e-05	0.002
55584_at	CHRNA9	-1.7594	Down	0.00978394	0.013
56033_at	BARX1	-1.76643	Down	0.00528146	0.009
23251_at	KIAA1024	-1.77183	Down	0.00577876	0.009
9315_at	NREP	-1.7725	Down	0.00848645	0.011
5885_at	RAD21	-1.7782	Down	0.013403	0.015
81930_at	KIF18A	-1.79078	Down	0.0134865	0.015
645638_at	LOC645638	-1.79907	Down	0.000260232	0.003
4820_at	NKTR	-1.80093	Down	0.0141706	0.015
54492_at	NEURL1B	-1.80403	Down	0.00156931	0.005
1519_at	CTSO	-1.80766	Down	0.00380076	0.008
57451_at	ODZ2	-1.81559	Down	0.000728658	0.004
10388_at	SYCP2	-1.8275	Down	0.00981899	0.013
22836_at	RHOBTB3	-1.83405	Down	0.0130764	0.015
257194_at	NEGR1	-1.84517	Down	0.00246214	0.006
23556_at	PIGN	-1.86796	Down	0.000560571	0.003
57586_at	SYT13	-1.88931	Down	1.44e-05	0.001
165215_at	FAM171B	-1.89803	Down	0.0126634	0.014
4256_at	MGP	-1.90458	Down	0.00347396	0.007
54510_at	PCDH18	-1.91929	Down	0.000165796	0.003
28776_at	IGLV7-43	-1.91941	Down	0.016909	0.017
25840_at	METTL7A	-1.92813	Down	1.24e-05	0.001
1591_at	CYP24A1	-1.93481	Down	0.000303297	0.003
169611_at	OLFML2A	-1.93991	Down	0.000770128	0.004
100131564_at	LOC100131564	-1.95345	Down	0.00751316	0.011
4603_at	MYBL1	-1.95652	Down	0.00170506	0.005
80215_at	RUNX1-IT1	-1.95855	Down	0.00333791	0.007
51196_at	PLCE1	-1.97004	Down	0.000524906	0.003
9079_at	LDB2	-1.97074	Down	6.83e-05	0.002
201299_at	RDM1	-1.98482	Down	0.00511989	0.009
5099_at	PCDH7	-1.99218	Down	0.000948151	0.004
23635_at	SSBP2	-2.00131	Down	0.00543371	0.009
114_at	ADCY8	-2.00453	Down	0.00328969	0.007
84693_at	MCEE	-2.01072	Down	0.000425256	0.003
3717_at	JAK2	-2.01548	Down	0.00341656	0.007
9928_at	KIF14	-2.01564	Down	0.0086781	0.012
112476_at	PRRT2	-2.01738	Down	0.00595235	0.01
54885_at	TBC1D8B	-2.02515	Down	0.00384277	0.008
55790_at	CSGALNACT1	-2.04236	Down	0.000130436	0.003
7153_at	TOP2A	-2.05175	Down	0.0122128	0.014
10082_at	GPC6	-2.06515	Down	9.42e-05	0.002
7903_at	ST8SIA4	-2.07078	Down	0.000165455	0.003
81575_at	APOLD1	-2.0728	Down	2.49e-05	0.001
22871_at	NLGN1	-2.09517	Down	0.00159628	0.005
22995_at	CEP152	-2.09656	Down	0.012975	0.015
1278_at	COL1A2	-2.09993	Down	2.03e-05	0.001
128553_at	TSHZ2	-2.11426	Down	0.000452716	0.003
4016_at	LOXL1	-2.11893	Down	0.013833	0.015
1646_at	AKR1C2	-2.1283	Down	0.00918094	0.012
2202_at	EFEMP1	-2.15868	Down	1.49e-05	0.001
5166_at	PDK4	-2.18501	Down	3.94e-05	0.002
400617_at	KCNJ2-AS1	-2.2309	Down	0.00983514	0.013
3953_at	LEPR	-2.2963	Down	0.00297793	0.006
2941_at	GSTA4	-2.30092	Down	0.00793661	0.011
10984_at	KCNQ1OT1	-2.36234	Down	0.00115982	0.004
10234_at	LRRC17	-2.42519	Down	0.000625163	0.003
4751_at	NEK2	-2.43601	Down	0.0125	0.014
1545_at	CYP1B1	-2.45988	Down	0.000816304	0.004
100130894_at	LOC100130894	-2.46142	Down	0.000697911	0.004
388630_at	TRABD2B	-2.50987	Down	0.0102757	0.013
60675_at	PROK2	-2.62005	Down	4.69e-05	0.002
5157_at	PDGFRL	-2.63051	Down	0.00124628	0.005
130733_at	TMEM178A	-2.73039	Down	0.000910828	0.004
2560_at	GABRB1	-2.73607	Down	0.000970634	0.004
79839_at	CCDC102B	-2.82937	Down	0.00375732	0.007
414899_at	BLID	-2.8969	Down	0.0108501	0.013
10628_at	TXNIP	-3.39751	Down	0.00342814	0.007
6489_at	ST8SIA1	-3.78607	Down	0.00275022	0.006
162540_at	SPPL2C	-4.0517	Down	0.012836	0.015
28457_at	IGHV2-5	-9.23131	Down	7.5e-05	0.002
221016_at	CCDC7	-11.6277	Down	1.62e-07	0
202151_at	RANBP3L	-12.3344	Down	9.01e-08	0
