# Supplementary material for: System analysis identifies distinct and common functional networks governed by transcription factor ASCL1, in glioma and small cell lung cancer
Source: Royal Society of Chemistry journal article supplement (doi:10.1039/c6mb00851h), 2017-05-18
Supplement: c6mb00851h1.zip [file c6mb00851h1.zip › Supplementary_Table_S2.xlsx]

## Sheet: SCLC DEGS Table S2
Supplementary Table S2: 574 differentially expressed genes upon ASCL1 silencing in SCLC ( Fold change 2 (log2 FC1) )
AffyID	Genes	Log2 fold change	Regulation	p-value	q-value
3802_at	KIR2DL1	6.49438	Up	0.0188828	0.02
4656_at	MYOG	6.11543	Up	0.0432641	0.044
6340_at	SCNN1G	4.93614	Up	7.04e-12	0
155465_at	AGR3	3.24296	Up	4.77e-06	0
114569_at	MAL2	3.08356	Up	0.00400057	0.004
4922_at	NTS	2.9881	Up	6.27e-05	0
285346_at	ZNF852	2.87327	Up	0.0497432	0.05
216_at	ALDH1A1	2.72387	Up	2.58e-10	0
253012_at	HEPACAM2	2.69047	Up	2.57e-07	0
3669_at	ISG20	2.37566	Up	2.06e-09	0
2591_at	GALNT3	2.31709	Up	1.37e-08	0
1646_at	AKR1C2	2.28031	Up	0.00171054	0.002
7103_at	TSPAN8	2.23584	Up	8.18e-10	0
64901_at	RANBP17	2.11463	Up	1.53e-08	0
5865_at	RAB3B	2.05393	Up	1.37e-07	0
79094_at	CHAC1	2.02711	Up	0.000234776	0
8707_at	B3GALT2	1.85099	Up	5.74e-09	0
59084_at	ENPP5	1.84585	Up	0.0288997	0
83667_at	SESN2	1.8367	Up	9.59e-05	0.03
26578_at	OSTF1	1.83194	Up	2.17e-07	0
57761_at	TRIB3	1.76489	Up	8.04e-09	0
134111_at	UBE2QL1	1.75898	Up	4.19e-07	0
1604_at	CD55	1.73724	Up	2.51e-08	0
6004_at	RGS16	1.71109	Up	9.15e-07	0
84002_at	B3GNT5	1.66986	Up	3.15e-10	0
92421_at	CHMP4C	1.65516	Up	5.06e-08	0
4319_at	MMP10	1.64353	Up	0.0017643	0
10631_at	POSTN	1.64292	Up	8.84e-07	0
100499467_at	LINC00673	1.6283	Up	1.01e-09	0.002
22809_at	ATF5	1.62021	Up	0.000159955	0
8140_at	SLC7A5	1.60641	Up	1.3e-06	0
1051_at	CEBPB	1.5787	Up	1.11e-09	0
6337_at	SCNN1A	1.57736	Up	0.000214158	0
221981_at	THSD7A	1.56405	Up	1.08e-09	0
51339_at	DACT1	1.54487	Up	5.95e-06	0
2281_at	FKBP1B	1.53036	Up	3.81e-06	0
79752_at	ZFAND1	1.5087	Up	0.00429863	0
6520_at	SLC3A2	1.4996	Up	3.43e-07	0
55062_at	WIPI1	1.48995	Up	1.82e-07	0.005
2643_at	GCH1	1.48662	Up	0.000286522	0
1645_at	AKR1C1	1.47146	Up	0.000107336	0
57449_at	PLEKHG5	1.46943	Up	4.08e-07	0
57526_at	PCDH19	1.45377	Up	4.32e-06	0
4354_at	MPP1	1.42291	Up	0.000189563	0
346007_at	EYS	1.41653	Up	0.000575928	0
5999_at	RGS4	1.39986	Up	1.11e-10	0
4109_at	MAGEA10	1.3934	Up	2.25e-05	0.001
220979_at	C10orf25	1.37074	Up	0.00125919	0
306_at	ANXA3	1.36869	Up	0.000186214	0
3977_at	LIFR	1.36381	Up	7.13e-06	0.001
58473_at	PLEKHB1	1.35704	Up	4.46e-08	0
11343_at	MGLL	1.30918	Up	1.1e-07	0
54935_at	DUSP23	1.30237	Up	5.13e-05	0
100131825_at	LOC100131825	1.29052	Up	2.9e-05	0
22854_at	NTNG1	1.28282	Up	0.00024311	0
956_at	ENTPD3	1.27701	Up	4.91e-07	0
286256_at	LCN12	1.26927	Up	0.000490219	0
5274_at	SERPINI1	1.26609	Up	4.36e-06	0
100130987_at	LOC100130987	1.25369	Up	0.0415723	0.001
27180_at	SIGLEC9	1.24231	Up	0.0429748	0
27445_at	PCLO	1.23849	Up	2.15e-07	0.042
98_at	ACYP2	1.23709	Up	6.95e-07	0.044
222068_at	TMED4	1.23469	Up	0.00419614	0
131096_at	KCNH8	1.23107	Up	5.47e-07	0
55323_at	LARP6	1.22348	Up	1.54e-09	0.005
11156_at	PTP4A3	1.21891	Up	1.86e-07	0
2744_at	GLS	1.21173	Up	3.08e-08	0
127933_at	UHMK1	1.20713	Up	0.00409742	0
84707_at	BEX2	1.20665	Up	5.07e-06	0
29104_at	N6AMT1	1.20026	Up	0.000244382	0.005
1649_at	DDIT3	1.18306	Up	2.1e-05	0
84915_at	FAM222A	1.17558	Up	4.84e-08	0
80709_at	AKNA	1.17481	Up	0.000304289	0
157638_at	FAM84B	1.17227	Up	3.48e-05	0
9477_at	MED20	1.16295	Up	1.82e-07	0
445_at	ASS1	1.15821	Up	0.000375809	0
140733_at	MACROD2	1.15023	Up	9.57e-05	0
3198_at	HOXA1	1.14899	Up	1.15e-05	0
54836_at	BSPRY	1.14712	Up	7.83e-08	0
2877_at	GPX2	1.1388	Up	4.53e-08	0
79139_at	DERL1	1.13021	Up	0.000527231	0
26291_at	FGF21	1.12083	Up	0.00043201	0
219699_at	UNC5B	1.11777	Up	3.04e-05	0.001
220047_at	CCDC83	1.11415	Up	0.0187399	0.001
253868_at	C20orf166-AS1	1.10874	Up	0.00354091	0
467_at	ATF3	1.10351	Up	1.05e-09	0.02
467_at	ATF3	1.10351	Up	1.05e-09	0.004
85377_at	MICALL1	1.10301	Up	0.00439492	0
1677_at	DFFB	1.10135	Up	6.52e-08	0.005
29914_at	UBIAD1	1.10037	Up	4.9e-07	0
55784_at	MCTP2	1.09664	Up	2.23e-05	0
54504_at	CPVL	1.09586	Up	1.89e-07	0
54749_at	EPDR1	1.09252	Up	0.00289951	0
64699_at	TMPRSS3	1.09187	Up	1.34e-09	0.003
2792_at	GNGT1	1.09097	Up	4.86e-05	0
161357_at	MDGA2	1.09067	Up	0.00653774	0
200634_at	KRTCAP3	1.08798	Up	0.0185648	0.007
6472_at	SHMT2	1.08649	Up	4.98e-06	0.02
10622_at	POLR3G	1.08138	Up	4.09e-10	0
5603_at	MAPK13	1.06961	Up	0.00109647	0
388_at	RHOB	1.06753	Up	0.00134793	0.001
283209_at	PGM2L1	1.0663	Up	0.00013544	0.002
340547_at	VSIG1	1.06548	Up	3.74e-08	0
390_at	RND3	1.06466	Up	2.85e-07	0
115207_at	KCTD12	1.064	Up	4.71e-05	0
8842_at	PROM1	1.06331	Up	0.000972894	0
25978_at	CHMP2B	1.05676	Up	2.1e-05	0.001
401097_at	C3orf80	1.05289	Up	0.00134349	0
219995_at	MS4A15	1.04553	Up	0.00146762	0.002
5471_at	PPAT	1.04545	Up	0.000732843	0.002
84953_at	MICALCL	1.04542	Up	0.000182297	0.001
2267_at	FGL1	1.04025	Up	0.00065397	0
3216_at	HOXB6	1.03807	Up	0.00634102	0.001
23426_at	GRIP1	1.03126	Up	1.64e-05	0.007
1102_at	RCBTB2	1.02813	Up	4.68e-05	0
23406_at	COTL1	1.0275	Up	0.000596459	0
7453_at	WARS	1.02586	Up	2.41e-07	0.001
25902_at	MTHFD1L	1.02494	Up	1.02e-08	0
9846_at	GAB2	1.02435	Up	1.03e-07	0
10560_at	SLC19A2	1.02205	Up	2.13e-06	0
10801_at	SEPT9	1.00979	Up	3.31869e-07	0
5446_at	PON3	1.00909	Up	1.06e-07	0
5565_at	PRKAB2	1.00611	Up	2.29e-07	0
116496_at	FAM129A	1.00104	Up	0.00014172	0
1949_at	EFNB3	-1.00053	Down	0.00083509	0.001
54877_at	ZCCHC2	-1.00331	Down	9.56e-09	0
88455_at	ANKRD13A	-1.00517	Down	7.09e-09	0
219736_at	STOX1	-1.0058	Down	4.17e-05	0
2519_at	FUCA2	-1.006	Down	9.27e-07	0
2009_at	EML1	-1.0068	Down	0.00117029	0.001
1605_at	DAG1	-1.00714	Down	4.18e-07	0
54020_at	SLC37A1	-1.00855	Down	6.42e-06	0
7086_at	TKT	-1.00903	Down	6.86e-05	0
81928_at	CABLES2	-1.00987	Down	1.26e-09	0
23258_at	DENND5A	-1.00994	Down	6.27e-09	0
80381_at	CD276	-1.01132	Down	1.21e-10	0
493_at	ATP2B4	-1.01259	Down	1.53e-08	0
26524_at	LATS2	-1.01296	Down	0.000140303	0
7464_at	CORO2A	-1.01299	Down	0.00693287	0
22874_at	PLEKHA6	-1.01363	Down	9.87e-07	0
55809_at	TRERF1	-1.01384	Down	3.65e-10	0.008
7050_at	TGIF1	-1.01656	Down	9.22e-09	0
333_at	APLP1	-1.01677	Down	0.0001	0
687_at	KLF9	-1.01743	Down	1.66e-07	0
94081_at	SFXN1	-1.0175	Down	4.2e-05	0
11046_at	SLC35D2	-1.01838	Down	0.00186457	0
57827_at	C6orf47	-1.01907	Down	7.97e-07	0.002
51602_at	NOP58	-1.01929	Down	3.09e-08	0
3609_at	ILF3	-1.0193	Down	3.14e-08	0
79154_at	DHRS11	-1.02094	Down	9.39e-06	0
140710_at	SOGA1	-1.02218	Down	2.94e-07	0
6990_at	DYNLT3	-1.02248	Down	4.94e-08	0
7743_at	ZNF189	-1.0227	Down	3.44e-06	0
84894_at	LINGO1	-1.02319	Down	6.09e-05	0
57190_at	SEPN1	-1.02507	Down	7.78e-05	0
220388_at	CCDC89	-1.0266	Down	7.35e-05	0
5604_at	MAP2K1	-1.02815	Down	2.17e-05	0
149473_at	CCDC24	-1.02886	Down	0.0192704	0
8569_at	MKNK1	-1.0307	Down	0.000200221	0
100287616_at	LOXL1-AS1	-1.03085	Down	1.48e-05	0.02
9728_at	SECISBP2L	-1.03102	Down	3.81e-09	0
342892_at	ZNF850	-1.03158	Down	4.51e-05	0
483_at	ATP1B3	-1.03269	Down	2.18e-06	0
7586_at	ZKSCAN1	-1.03373	Down	3.15e-08	0
404217_at	CTXN1	-1.03474	Down	0.000239556	0
26018_at	LRIG1	-1.03963	Down	4.2e-06	0
284837_at	LOC284837	-1.04008	Down	0.0133888	0
5698_at	PSMB9	-1.04032	Down	0.000252005	0
55731_at	FAM222B	-1.04066	Down	1.06e-07	0.014
6492_at	SIM1	-1.04088	Down	0.0244559	0
1374_at	CPT1A	-1.04094	Down	1.67e-09	0
84255_at	SLC37A3	-1.04481	Down	5.09e-05	0.025
5425_at	POLD2	-1.04485	Down	9.77e-09	0
79751_at	SLC25A22	-1.04653	Down	8.02e-06	0
7855_at	FZD5	-1.04657	Down	0.000372112	0
253558_at	LCLAT1	-1.04662	Down	6.09e-05	0
966_at	CD59	-1.0474	Down	1.52e-06	0
4628_at	MYH10	-1.04786	Down	6.73e-09	0
1955_at	MEGF9	-1.04879	Down	2.36e-08	0
54800_at	KLHL24	-1.05126	Down	0.000261016	0
79142_at	PHF23	-1.05128	Down	1.7e-07	0
57475_at	PLEKHH1	-1.05205	Down	0.000103432	0
26262_at	TSPAN17	-1.05232	Down	0.000434798	0
1952_at	CELSR2	-1.05481	Down	3.24e-08	0
5926_at	ARID4A	-1.05484	Down	2.72e-09	0.001
55586_at	MIOX	-1.05494	Down	0.00992392	0
203547_at	VMA21	-1.05825	Down	5.38e-07	0
147923_at	ZNF420	-1.05874	Down	1.85e-06	0.011
4738_at	NEDD8	-1.05891	Down	2.32e-07	0
81614_at	NIPA2	-1.05956	Down	3.76e-09	0
9414_at	TJP2	-1.05971	Down	8.58e-09	0
221895_at	JAZF1	-1.0603	Down	9.42e-06	0
54733_at	SLC35F2	-1.06053	Down	2.38e-07	0
399664_at	MEX3D	-1.06182	Down	0.000553402	0
100505664_at	LOC100505664	-1.06341	Down	0.00446493	0
7764_at	ZNF217	-1.06421	Down	9.48e-05	0.001
6311_at	ATXN2	-1.06504	Down	4.61e-09	0.005
2273_at	FHL1	-1.06508	Down	1.55e-07	0
2971_at	GTF3A	-1.06534	Down	1.49e-06	0
57205_at	ATP10D	-1.06984	Down	6.24e-08	0
58494_at	JAM2	-1.06986	Down	4.08e-08	0
64167_at	ERAP2	-1.07052	Down	0.000164521	0
5152_at	PDE9A	-1.07131	Down	4.08e-05	0
7138_at	TNNT1	-1.07179	Down	0.027924	0
5879_at	RAC1	-1.07297	Down	1.69e-09	0
152485_at	ZNF827	-1.07429	Down	1.96e-05	0.029
3209_at	HOXA13	-1.07503	Down	0.00063274	0
84223_at	IQCG	-1.07507	Down	3.37e-06	0
10554_at	AGPAT1	-1.07507	Down	2.97e-06	0.001
22937_at	SCAP	-1.07888	Down	0.000651729	0
57337_at	SENP7	-1.07974	Down	3.8e-08	0
6418_at	SET	-1.08093	Down	2.9e-10	0.001
57326_at	PBXIP1	-1.08184	Down	0.000109488	0
55589_at	BMP2K	-1.08273	Down	3.87e-06	0
5209_at	PFKFB3	-1.08397	Down	5.63e-05	0
56262_at	LRRC8A	-1.08434	Down	5.81e-06	0
120_at	ADD3	-1.08512	Down	1.4e-06	0
9639_at	ARHGEF10	-1.08891	Down	7.21e-11	0
147912_at	SIX5	-1.08993	Down	2.15e-05	0
930_at	CD19	-1.09131	Down	0.00316398	0
4162_at	MCAM	-1.09207	Down	3.95e-05	0
6767_at	ST13	-1.09292	Down	1.25e-07	0.004
23095_at	KIF1B	-1.09348	Down	4.98e-08	0
7098_at	TLR3	-1.0937	Down	0.0201831	0
221035_at	REEP3	-1.09538	Down	2.56e-05	0
2319_at	FLOT2	-1.09628	Down	9.37e-06	0.021
817_at	CAMK2D	-1.09771	Down	4.68e-06	0
754_at	PTTG1IP	-1.09781	Down	1.77e-09	0
9149_at	DYRK1B	-1.09943	Down	1.71e-07	0
4281_at	MID1	-1.09993	Down	4.56e-06	0
147_at	ADRA1B	-1.10066	Down	1.13e-06	0
65003_at	MRPL11	-1.10101	Down	5.44e-06	0
51760_at	SYT17	-1.1042	Down	2.31e-05	0
375057_at	C1orf95	-1.10445	Down	0.0024482	0
7005_at	TEAD3	-1.1049	Down	0.0173824	0
54551_at	MAGEL2	-1.1053	Down	0.000799552	0.003
5720_at	PSME1	-1.10613	Down	2.29e-06	0.018
3930_at	LBR	-1.10694	Down	4.09e-07	0.001
7733_at	ZNF180	-1.10756	Down	6.44e-10	0
196527_at	ANO6	-1.11005	Down	1.3e-07	0
205428_at	C3orf58	-1.11014	Down	0.000251184	0
80035_at	ANP32A-IT1	-1.11158	Down	2.39e-05	0
10109_at	ARPC2	-1.11217	Down	6.45e-06	0
100289635_at	ZNF605	-1.11527	Down	5.89e-08	0
79006_at	METRN	-1.11531	Down	4.65e-06	0
283149_at	BCL9L	-1.11786	Down	0.00262388	0
2561_at	GABRB2	-1.1189	Down	2.87e-07	0
5634_at	PRPS2	-1.12014	Down	1.09e-06	0.003
100289274_at	DNAJC3-AS1	-1.12475	Down	2.45e-07	0
7580_at	ZNF32	-1.12513	Down	1.17e-08	0
80726_at	KIAA1683	-1.12584	Down	0.00393347	0
150465_at	TTL	-1.13445	Down	3.15e-08	0
153684_at	LOC153684	-1.1355	Down	8.16e-07	0.004
11119_at	BTN3A1	-1.13648	Down	1.89e-07	0
57446_at	NDRG3	-1.13705	Down	1.82e-09	0
55291_at	PPP6R3	-1.1371	Down	5.59e-08	0
148641_at	SLC35F3	-1.13769	Down	0.0020991	0
94030_at	LRRC4B	-1.1421	Down	6.36e-05	0
79366_at	HMGN5	-1.14648	Down	7.67e-07	0
9600_at	PITPNM1	-1.14742	Down	0.00213036	0.002
57535_at	KIAA1324	-1.14826	Down	5.12e-07	0
55701_at	ARHGEF40	-1.14854	Down	0.000638348	0
100505641_at	FGD5-AS1	-1.14879	Down	0.0435909	0.002
6304_at	SATB1	-1.15026	Down	1.5e-05	0
7738_at	ZNF184	-1.15034	Down	1.03e-08	0.001
170954_at	PPP1R18	-1.15507	Down	0.000465037	0.044
84079_at	ANKRD27	-1.15627	Down	3.14e-07	0
80854_at	SETD7	-1.15853	Down	9.21e-10	0
22881_at	ANKRD6	-1.15907	Down	4.46e-05	0.001
4674_at	NAP1L2	-1.16024	Down	1.19e-06	0
23112_at	TNRC6B	-1.16153	Down	4.79e-10	0
284996_at	RNF149	-1.16167	Down	3.51e-07	0
7696_at	ZNF137P	-1.16211	Down	3.39e-06	0
87_at	ACTN1	-1.16337	Down	9.37e-10	0
3745_at	KCNB1	-1.16349	Down	6.54e-09	0
727936_at	GXYLT2	-1.16817	Down	2.21e-05	0
23564_at	DDAH2	-1.16995	Down	2.73e-05	0
64172_at	OSGEPL1	-1.17235	Down	5.65e-11	0
55769_at	ZNF83	-1.17432	Down	2.57e-08	0
4615_at	MYD88	-1.17513	Down	0.000115487	0
56917_at	MEIS3	-1.17663	Down	8.48e-06	0
84629_at	TNRC18	-1.17794	Down	8.95e-10	0
128_at	ADH5	-1.18398	Down	2.21e-07	0
2821_at	GPI	-1.18481	Down	1.52e-06	0
8991_at	SELENBP1	-1.18504	Down	3.74e-06	0
100652860_at	LOC100652860	-1.18788	Down	7.35e-06	0
961_at	CD47	-1.18815	Down	1.85e-05	0
26030_at	PLEKHG3	-1.18972	Down	1.86e-06	0
5332_at	PLCB4	-1.19296	Down	6.98e-08	0
6717_at	SRI	-1.1931	Down	2.59e-07	0
80759_at	KHDC1	-1.19406	Down	0.0273003	0
55666_at	NPLOC4	-1.1941	Down	1.15e-09	0
2627_at	GATA6	-1.1942	Down	4.63e-07	0
4054_at	LTBP3	-1.19449	Down	8.33e-05	0.028
85300_at	ATCAY	-1.19489	Down	8.08e-08	0
51315_at	KRCC1	-1.19587	Down	0.000864817	0
219749_at	ZNF25	-1.19721	Down	0.000127458	0
3097_at	HIVEP2	-1.19752	Down	1.31e-05	0
5283_at	PIGH	-1.1987	Down	3.44e-05	0.001
8900_at	CCNA1	-1.19895	Down	5.18e-07	0
55970_at	GNG12	-1.19924	Down	3.46e-06	0
10552_at	ARPC1A	-1.19925	Down	1.65e-08	0
90249_at	UNC5A	-1.19986	Down	7.84e-05	0
4801_at	NFYB	-1.20087	Down	2.32e-06	0
10741_at	RBBP9	-1.20533	Down	8.2e-07	0
149175_at	MANEAL	-1.20539	Down	7.23e-05	0
6382_at	SDC1	-1.20623	Down	0.0107971	0
8099_at	CDK2AP1	-1.21187	Down	5.88e-05	0
84266_at	ALKBH7	-1.21604	Down	1.11e-05	0
1840_at	DTX1	-1.21819	Down	6.64e-09	0.012
50807_at	ASAP1	-1.22675	Down	7.54e-08	0
54873_at	PALMD	-1.2291	Down	1.63e-06	0
3992_at	FADS1	-1.23025	Down	1.96e-07	0
2824_at	GPM6B	-1.23135	Down	7.53e-07	0
11113_at	CIT	-1.23421	Down	2.16e-10	0
10778_at	ZNF271	-1.23477	Down	2.67e-09	0
9412_at	MED21	-1.23576	Down	2.21e-10	0
55204_at	GOLPH3L	-1.2369	Down	1.5e-08	0
27295_at	PDLIM3	-1.23814	Down	6.09e-06	0
27333_at	GOLIM4	-1.23819	Down	2.03e-06	0
100506421_at	LOC100506421	-1.23893	Down	1.29e-08	0
2936_at	GSR	-1.24181	Down	3.09e-10	0
9901_at	SRGAP3	-1.24386	Down	9.04e-06	0
83734_at	ATG10	-1.24464	Down	1.01e-08	0
90075_at	ZNF30	-1.24496	Down	4.27e-05	0
11031_at	RAB31	-1.24868	Down	0.00205782	0
9142_at	CXorf1	-1.25028	Down	0.00143299	0
11013_at	TMSB15A	-1.25226	Down	5.48e-07	0
64778_at	FNDC3B	-1.25365	Down	2.84e-10	0
11339_at	OIP5	-1.25436	Down	5.44e-09	0.002
80213_at	TM2D3	-1.25518	Down	0.000495681	0.002
90378_at	SAMD1	-1.25624	Down	5.74e-07	0
90378_at	SAMD1	-1.25624	Down	5.74e-07	0
29796_at	UQCR10	-1.25882	Down	3.59e-11	0
80818_at	ZNF436	-1.25987	Down	2.03e-06	0.001
55819_at	RNF130	-1.2616	Down	5.47e-09	0
6253_at	RTN2	-1.26274	Down	6.23e-08	0
4833_at	NME4	-1.26305	Down	1.83e-05	0
27239_at	GPR162	-1.26691	Down	0.000188129	0
388650_at	FAM69A	-1.26709	Down	5.25e-05	0
80110_at	ZNF614	-1.26726	Down	5.99e-09	0
9467_at	SH3BP5	-1.26744	Down	0.000605067	0
6543_at	SLC8A2	-1.26883	Down	3.41e-07	0
2669_at	GEM	-1.27344	Down	8.95e-05	0
4821_at	NKX2-2	-1.275	Down	4.5e-05	0
57685_at	CACHD1	-1.27579	Down	3.98e-09	0.001
27344_at	PCSK1N	-1.27643	Down	1.57e-10	0
1525_at	CXADR	-1.27951	Down	3.26e-07	0
151636_at	DTX3L	-1.2802	Down	3.56e-09	0
5118_at	PCOLCE	-1.28207	Down	0.00151352	0
58155_at	PTBP2	-1.28491	Down	0.0493325	0
253832_at	ZDHHC20	-1.28824	Down	1.89e-09	0
9653_at	HS2ST1	-1.28831	Down	2.75e-08	0
27257_at	LSM1	-1.28904	Down	1.64e-06	0.002
85444_at	LRRCC1	-1.29513	Down	1.7e-08	0.049
284323_at	ZNF780A	-1.2963	Down	9.75e-08	0
5307_at	PITX1	-1.29674	Down	3.03e-07	0
22859_at	LPHN1	-1.29917	Down	3.77e-08	0
7041_at	TGFB1I1	-1.30107	Down	0.0167317	0
6602_at	SMARCD1	-1.30212	Down	1.5e-10	0
84056_at	KATNAL1	-1.30342	Down	2.04e-10	0
900_at	CCNG1	-1.30723	Down	2.86e-06	0
10162_at	LPCAT3	-1.30797	Down	1.01e-05	0.018
348801_at	LNP1	-1.30809	Down	2.32e-07	0
147495_at	APCDD1	-1.31115	Down	2.43e-05	0
80737_at	VWA7	-1.3133	Down	0.00020606	0
79172_at	CENPO	-1.31506	Down	1.18e-10	0
100507579_at	LOC100507579	-1.31552	Down	0.000253471	0
54492_at	NEURL1B	-1.32155	Down	8.89e-07	0
23507_at	LRRC8B	-1.32497	Down	3.88e-05	0
1207_at	CLNS1A	-1.32575	Down	9.32e-12	0
90933_at	TRIM41	-1.32841	Down	3.25e-07	0
286144_at	TRIQK	-1.33096	Down	2.69e-08	0
201266_at	SLC39A11	-1.33407	Down	1.62e-10	0
10600_at	USP16	-1.33943	Down	1.58e-06	0
3660_at	IRF2	-1.34271	Down	9.45e-08	0
114804_at	RNF157	-1.34404	Down	2.32e-07	0
389434_at	IYD	-1.34665	Down	0.000102489	0
10140_at	TOB1	-1.34666	Down	1.77e-05	0
4435_at	CITED1	-1.34974	Down	0.00143425	0
4240_at	MFGE8	-1.35052	Down	7.83e-08	0
8529_at	CYP4F2	-1.35137	Down	0.0380104	0
4147_at	MATN2	-1.35393	Down	7.67e-05	0
4784_at	NFIX	-1.35539	Down	4.82e-06	0.002
84436_at	ZNF528	-1.35603	Down	1.04e-05	0
23174_at	ZCCHC14	-1.35873	Down	1.05e-08	0.039
256586_at	LYSMD2	-1.36246	Down	3.22e-09	0
6616_at	SNAP25	-1.36714	Down	2.72e-05	0
987_at	LRBA	-1.37068	Down	1.37e-06	0
3956_at	LGALS1	-1.37664	Down	0.000308923	0
81631_at	MAP1LC3B	-1.37769	Down	1.5e-06	0
5701_at	PSMC2	-1.37847	Down	7.59e-10	0
138050_at	HGSNAT	-1.37874	Down	6.55e-09	0
55374_at	TMCO6	-1.37947	Down	5.15e-10	0
403_at	ARL3	-1.37957	Down	1.79e-06	0
23014_at	FBXO21	-1.37987	Down	2.36e-09	0
148534_at	TMEM56	-1.38198	Down	0.00437518	0
131034_at	CPNE4	-1.38394	Down	0.000815025	0
100506557_at	LOC100506557	-1.38685	Down	0.0312151	0
11118_at	BTN3A2	-1.3913	Down	3.42e-10	0
1417_at	CRYBB3	-1.39185	Down	0.0182473	0
2530_at	FUT8	-1.39494	Down	1.06e-08	0.005
89765_at	RSPH1	-1.40264	Down	4.49e-05	0.001
375790_at	AGRN	-1.40465	Down	7.02e-05	0.032
51232_at	CRIM1	-1.40474	Down	0.0425465	0
4601_at	MXI1	-1.40688	Down	1.45e-07	0.019
387103_at	CENPW	-1.41242	Down	4.85e-09	0
9910_at	RABGAP1L	-1.4266	Down	0.000276291	0
56943_at	ENY2	-1.42678	Down	6.25e-06	0
10059_at	DNM1L	-1.43416	Down	1.02e-10	0.043
10059_at	DNM1L	-1.43416	Down	1.02e-10	0
3091_at	HIF1A	-1.43876	Down	1.3e-11	0
151473_at	SLC16A14	-1.44009	Down	0.000910958	0
784_at	CACNB3	-1.44116	Down	5.02e-09	0
1944_at	EFNA3	-1.44456	Down	2.95e-05	0
1917_at	EEF1A2	-1.44598	Down	5.63e-10	0
9839_at	ZEB2	-1.44758	Down	2.05e-07	0.001
10687_at	PNMA2	-1.44827	Down	1.36e-09	0
25853_at	DCAF12	-1.45586	Down	2.78e-05	0
10095_at	ARPC1B	-1.46722	Down	0.00259265	0
221061_at	FAM171A1	-1.47059	Down	1.31e-06	0
3667_at	IRS1	-1.47323	Down	5.67e-09	0
6237_at	RRAS	-1.47773	Down	0.000912992	0
81575_at	APOLD1	-1.4805	Down	1.98e-08	0.003
79718_at	TBL1XR1	-1.48157	Down	2.8e-10	0
4343_at	MOV10	-1.4848	Down	8.73e-08	0
344148_at	NCKAP5	-1.48812	Down	0.00704917	0.001
22862_at	FNDC3A	-1.48998	Down	2.5e-09	0
28996_at	HIPK2	-1.49012	Down	0.000110913	0
23338_at	PHF15	-1.49269	Down	4.95e-05	0
23338_at	PHF15	-1.49269	Down	4.95e-05	0.008
389792_at	IER5L	-1.49863	Down	7.84e-09	0
10638_at	SPHAR	-1.50195	Down	0.000757958	0
7504_at	XK	-1.50296	Down	8.22e-09	0
8933_at	FAM127A	-1.5045	Down	8.04e-09	0
7414_at	VCL	-1.50649	Down	1.46e-08	0.001
18_at	ABAT	-1.51189	Down	0.0193072	0
170960_at	ZNF721	-1.5175	Down	8.11e-06	0
6038_at	RNASE4	-1.51911	Down	6.67e-05	0
56126_at	PCDHB10	-1.53109	Down	1.99e-09	0.02
84418_at	CYSTM1	-1.54086	Down	1.4e-07	0
55151_at	TMEM38B	-1.54344	Down	7.68e-11	0
57606_at	SLAIN2	-1.54373	Down	5.76e-07	0
79673_at	ZNF329	-1.54699	Down	1.3e-07	0
167838_at	TXLNB	-1.54716	Down	0.00820224	0
11337_at	GABARAP	-1.5513	Down	3.87e-10	0
10237_at	SLC35B1	-1.55379	Down	1.66e-10	0
440515_at	ZNF506	-1.56437	Down	0.00340901	0.009
25959_at	KANK2	-1.56489	Down	7.93e-07	0
25959_at	KANK2	-1.56489	Down	7.93e-07	0
8079_at	MLF2	-1.56564	Down	2.79e-07	0.004
10670_at	RRAGA	-1.56729	Down	1.75e-09	0
54499_at	TMCO1	-1.56829	Down	4.03e-12	0
126823_at	KLHDC9	-1.56899	Down	5.59e-08	0
126823_at	KLHDC9	-1.56899	Down	5.59e-08	0
51523_at	CXXC5	-1.56928	Down	1.51e-06	0
84634_at	KISS1R	-1.57466	Down	0.000277689	0
55827_at	DCAF6	-1.57574	Down	3.47e-11	0
677_at	ZFP36L1	-1.57667	Down	0.000155743	0
23022_at	PALLD	-1.58272	Down	5.28e-12	0
7089_at	TLE2	-1.58967	Down	0.00015539	0
254263_at	CNIH2	-1.58973	Down	2.8e-08	0
1397_at	CRIP2	-1.59032	Down	4.33e-07	0
768096_at	HAR1A	-1.59977	Down	0.00184544	0
53826_at	FXYD6	-1.60263	Down	3.03e-06	0.002
770_at	CA11	-1.60418	Down	7.48e-05	0
51439_at	FAM8A1	-1.60444	Down	2.73e-07	0
116028_at	RMI2	-1.60822	Down	6.78e-09	0
26157_at	GIMAP2	-1.61468	Down	0.00791452	0
3092_at	HIP1	-1.61599	Down	2.22e-05	0.009
23186_at	RCOR1	-1.61848	Down	2.75e-11	0
22929_at	SEPHS1	-1.61955	Down	3.74e-08	0
55796_at	MBNL3	-1.63036	Down	1.05e-08	0
122060_at	SLAIN1	-1.63209	Down	7.09e-08	0
9863_at	MAGI2	-1.63445	Down	3.02e-09	0
351_at	APP	-1.63663	Down	3.13e-11	0
3251_at	HPRT1	-1.65002	Down	8.28e-12	0
23769_at	FLRT1	-1.65144	Down	3.7e-05	0
23089_at	PEG10	-1.65387	Down	1.15e-11	0
283174_at	LOC283174	-1.65893	Down	2.36e-08	0
22882_at	ZHX2	-1.66439	Down	2.4e-08	0
1488_at	CTBP2	-1.66607	Down	1.25e-06	0
51449_at	PCYOX1	-1.66702	Down	2.13e-05	0
392_at	ARHGAP1	-1.66917	Down	7.07e-09	0
5010_at	CLDN11	-1.67069	Down	6.42e-07	0
51762_at	RAB8B	-1.67443	Down	8.74e-08	0
283554_at	GPR137C	-1.67448	Down	4.73e-12	0
27122_at	DKK3	-1.68093	Down	7.91e-05	0
50650_at	ARHGEF3	-1.68766	Down	1.21e-08	0
64979_at	MRPL36	-1.69156	Down	1.55e-09	0
5792_at	PTPRF	-1.69675	Down	2.66e-08	0
7040_at	TGFB1	-1.6994	Down	0.0034225	0
5087_at	PBX1	-1.70111	Down	3.38e-08	0.004
1112_at	FOXN3	-1.70657	Down	2.77e-11	0
51280_at	GOLM1	-1.7109	Down	1.46e-07	0
25840_at	METTL7A	-1.72456	Down	0.000482325	0
51645_at	PPIL1	-1.73403	Down	3.05e-07	0.001
79191_at	IRX3	-1.75325	Down	1.68e-06	0
157378_at	TMEM65	-1.75645	Down	4.83e-08	0
10384_at	BTN3A3	-1.7685	Down	2.07e-11	0
221184_at	CPNE2	-1.7735	Down	0.000179193	0
140885_at	SIRPA	-1.77574	Down	5.14e-06	0
64801_at	ARV1	-1.78368	Down	3.7e-10	0
116372_at	LYPD1	-1.79645	Down	2.92e-09	0
4277_at	MICB	-1.8026	Down	5.82e-06	0
6624_at	FSCN1	-1.81004	Down	3.24e-09	0
51087_at	YBX2	-1.81542	Down	3.52e-10	0
8303_at	SNN	-1.85442	Down	1.85e-09	0
168544_at	ZNF467	-1.85563	Down	0.000881521	0
138162_at	C9orf116	-1.86182	Down	3.16e-05	0.001
55312_at	RFK	-1.86386	Down	1.53e-07	0
55026_at	FAM70A	-1.8722	Down	3.29e-08	0
8932_at	MBD2	-1.89843	Down	9.44e-11	0
645_at	BLVRB	-1.90174	Down	0.000906081	0
84662_at	GLIS2	-1.92125	Down	6.47e-07	0.001
9890_at	LPPR4	-1.93083	Down	6.67e-12	0
11145_at	PLA2G16	-1.9424	Down	0.00224163	0
342979_at	PALM3	-1.9492	Down	6.39e-06	0.003
648987_at	LOC648987	-1.95335	Down	1.69e-08	0
23433_at	RHOQ	-1.96165	Down	4.72e-06	0
4201_at	MEA1	-1.9757	Down	1.78e-07	0
1945_at	EFNA4	-1.98146	Down	2.85e-07	0
57493_at	HEG1	-1.99603	Down	1e-09	0
429_at	ASCL1	-2.01778	Down	3.06e-05	0
1173_at	AP2M1	-2.03982	Down	1.97e-10	0
27230_at	SERP1	-2.04406	Down	3.54e-13	0
7074_at	TIAM1	-2.05027	Down	3.15e-10	0
55225_at	RAVER2	-2.05121	Down	2.95e-10	0
9761_at	MLEC	-2.05862	Down	1.61e-11	0
3490_at	IGFBP7	-2.07776	Down	8.52e-07	0
201780_at	SLC10A4	-2.10453	Down	6.04e-08	0
6646_at	SOAT1	-2.10952	Down	3.15e-07	0
7077_at	TIMP2	-2.12177	Down	9.63e-06	0
725_at	C4BPB	-2.14354	Down	0.00113487	0.001
4215_at	MAP3K3	-2.19194	Down	9.4e-07	0
25800_at	SLC39A6	-2.22818	Down	3.51e-11	0
2633_at	GBP1	-2.26274	Down	1.34e-07	0
10815_at	CPLX1	-2.29318	Down	4.73e-12	0
79966_at	SCD5	-2.2943	Down	3.27e-07	0
2697_at	GJA1	-2.31186	Down	0.00147866	0.002
1118_at	CHIT1	-2.36389	Down	0.0220918	0.023
10154_at	PLXNC1	-2.40532	Down	4.83e-06	0
334_at	APLP2	-2.45866	Down	2.08e-13	0
4016_at	LOXL1	-2.48375	Down	2.03e-13	0
81606_at	LBH	-2.50685	Down	4.05e-07	0
665_at	BNIP3L	-2.55179	Down	1.78e-09	0
126638_at	RPTN	-2.63325	Down	0.0340009	0.035
51298_at	THEG	-2.73926	Down	0.0421726	0.043
219654_at	ZCCHC24	-2.74665	Down	1.46e-05	0
122622_at	ADSSL1	-2.89344	Down	3.78e-05	0
56145_at	PCDHA3	-2.98415	Down	0.021041	0.022
26032_at	SUSD5	-3.0428	Down	6.12e-09	0
100130418_at	CECR7	-3.10582	Down	0.0134838	0.014
27123_at	DKK2	-3.15745	Down	0.0394543	0.04
1280_at	COL2A1	-3.22672	Down	1.6e-08	0
100506083_at	LOC100506083	-3.24272	Down	0.026355	0.027
27294_at	DHDH	-3.29005	Down	0.0474014	0.048
6557_at	SLC12A1	-3.32701	Down	0.0490036	0.049
112476_at	PRRT2	-3.33827	Down	4.64e-08	0
3890_at	KRT84	-3.55515	Down	0.0153251	0.016
641372_at	ACOT6	-3.58615	Down	0.0147168	0.016
7634_at	ZNF80	-3.67174	Down	0.0101666	0.011
143678_at	C11orf94	-3.67703	Down	0.00530839	0.006
4192_at	MDK	-3.8523	Down	5.99e-10	0
7620_at	ZNF69	-4.23615	Down	0.0164513	0.017
100505811_at	LOC100505811	-4.37193	Down	0.0442352	0.045
100132464_at	FAM99B	-4.39343	Down	0.0102778	0.011
79785_at	RERGL	-4.67185	Down	0.0176744	0.019
100507253_at	SMIM2-AS1	-5.29445	Down	0.0247158	0.026
643837_at	LOC643837	-5.79112	Down	0.00709736	0.008
10321_at	CRISP3	-6.74756	Down	0.00325719	0.004
56000_at	NXF3	-7.6113	Down	0.00418653	0.005
4994_at	OR3A1	-8.56463	Down	1.49e-07	0
10647_at	SCGB1D2	-12.0888	Down	2e-11	0
