# Supplementary material for: System analysis identifies distinct and common functional networks governed by transcription factor ASCL1, in glioma and small cell lung cancer
Source: Royal Society of Chemistry journal article supplement (doi:10.1039/c6mb00851h), 2017-05-18
Supplement: c6mb00851h1.zip [file c6mb00851h1.zip › Supplementary_Table_S3.xlsx]

## Sheet: Glioma_DEGS_withEBOX-S3A
Supplementary Table S3A: ASCL1 targets with EBOX (CAGCTG) in glioma DEGs (n=182)
ASCL1 targets with its binding sites	No.of Ebox motifs	Log2 fold change	Regulation	p-value	q-value
GLP2R	2	10.0008	Up	0.000238467	0.003
THBD	2	3.16671	Up	3.53e-05	0.001
CCL20	1	2.41703	Up	0.00160553	0.005
TAGLN3	1	1.80824	Up	5.91e-05	0.002
APOBEC3F	1	1.54453	Up	0.00655382	0.01
SPHK1	2	1.49074	Up	0.000941076	0.004
PPAN	2	1.48666	Up	0.000217938	0.003
PARD6B	1	1.47873	Up	0.000732094	0.004
MAFF	2	1.46874	Up	0.000349068	0.003
PYCRL	1	1.45841	Up	0.00127326	0.005
SF3B4	1	1.40905	Up	0.000460635	0.003
TAS2R5	1	1.37329	Up	0.00288684	0.006
C21orf90	1	1.37292	Up	0.00852583	0.011
CD274	1	1.36562	Up	0.00020958	0.003
IL1B	1	1.34768	Up	0.000525206	0.003
PLEKHS1	1	1.33926	Up	0.00574319	0.009
CDC25A	1	1.28358	Up	0.000329708	0.003
SH2D5	1	1.25067	Up	0.000948226	0.004
DPYSL4	1	1.24987	Up	0.00142201	0.005
TMEM177	2	1.23093	Up	0.000551502	0.003
PHLDA2	2	1.22796	Up	0.000734999	0.004
SH2D2A	1	1.1906	Up	0.0143744	0.015
ZGPAT	1	1.18133	Up	0.00284331	0.006
SPSB1	1	1.17022	Up	0.000605533	0.003
FLCN	1	1.14473	Up	0.00124793	0.005
CHIT1	1	1.1429	Up	0.00483303	0.009
SLC19A1	3	1.12537	Up	0.00292287	0.006
ANGPTL4	1	1.1252	Up	0.00050123	0.003
TIGD5	2	1.11807	Up	0.00584281	0.009
OSR1	2	1.10934	Up	0.00210387	0.006
CTNS	1	1.10817	Up	0.000597375	0.003
EHD1	1	1.09675	Up	0.00158563	0.005
WFDC3	1	1.08988	Up	0.00154895	0.005
TNFSF15	1	1.08621	Up	0.00178776	0.005
NSDHL	1	1.07887	Up	0.00385571	0.008
CYB5R2	1	1.06554	Up	0.013324	0.015
IGFBP1	2	1.06336	Up	0.00134146	0.005
RABEP2	1	1.05492	Up	0.0068824	0.01
RCE1	1	1.03708	Up	0.000528223	0.003
ZNF696	2	1.02697	Up	0.0119143	0.014
KLF4	1	-1.00127	Down	0.00206146	0.006
PCDH10	1	-1.00642	Down	0.00715165	0.01
ANTXR1	1	-1.01429	Down	0.00559093	0.009
TYSND1	2	-1.02775	Down	0.0041529	0.008
MSS51	1	-1.02794	Down	0.0164737	0.017
TMCC1	1	-1.02951	Down	0.00750848	0.011
TRAK1	1	-1.03016	Down	0.00591231	0.01
MXI1	3	-1.03245	Down	0.0119495	0.014
VPS26A	1	-1.0334	Down	0.00415667	0.008
FXR1	1	-1.03376	Down	0.00700951	0.01
HSPG2	1	-1.0349	Down	0.00122088	0.005
EYA1	2	-1.03637	Down	0.00380861	0.008
LMCD1	1	-1.03967	Down	0.0040916	0.008
LTBP1	1	-1.05557	Down	0.00275785	0.006
LARP1B	1	-1.05706	Down	0.0133303	0.015
CRTC3	1	-1.05825	Down	0.000528208	0.003
PLCB1	2	-1.06464	Down	0.00456558	0.008
RNPC3	1	-1.07167	Down	0.00956629	0.012
SEC16B	1	-1.07332	Down	0.00248625	0.006
ASS1	1	-1.07713	Down	0.00714154	0.01
BBX	1	-1.09377	Down	0.00906056	0.012
KIF11	1	-1.09639	Down	0.0121918	0.014
RNF128	1	-1.09943	Down	0.00508565	0.009
TRIM52	2	-1.10232	Down	0.010161	0.013
TMTC2	1	-1.11219	Down	0.0136547	0.015
COL12A1	2	-1.1123	Down	0.00275451	0.006
C1orf198	1	-1.11623	Down	0.0131672	0.015
HOPX	1	-1.11957	Down	0.00731621	0.011
C20orf112	1	-1.12695	Down	0.00559387	0.009
GPAM	1	-1.13023	Down	0.00478272	0.008
TNFSF13B	1	-1.13039	Down	0.0055147	0.009
TRERF1	1	-1.13067	Down	0.00101498	0.004
TMEM108	1	-1.13621	Down	0.00179971	0.005
MXD3	2	-1.13965	Down	0.00147335	0.005
C1QTNF3	1	-1.14751	Down	0.0105074	0.013
TMEM100	1	-1.14875	Down	0.00197367	0.005
BNC1	1	-1.15077	Down	0.00793557	0.011
PCYOX1L	1	-1.15308	Down	0.00509862	0.009
IQCD	2	-1.15323	Down	0.00823388	0.011
BACE2	1	-1.1563	Down	0.00711493	0.01
UBASH3B	1	-1.15726	Down	0.00356607	0.007
IL15	1	-1.15824	Down	0.00143159	0.005
NUSAP1	1	-1.16974	Down	0.00128578	0.005
CHSY3	2	-1.1702	Down	0.00847608	0.011
GLI3	1	-1.17048	Down	0.0005515	0.003
COL11A1	1	-1.17327	Down	0.00720693	0.01
KIAA1211L	4	-1.17333	Down	0.000689375	0.004
ATXN1	2	-1.1735	Down	0.0114211	0.014
RHOBTB1	1	-1.17719	Down	0.00946605	0.012
MALT1	1	-1.19316	Down	0.00626372	0.01
CYP2U1	1	-1.19569	Down	0.0100117	0.013
HOXD10	1	-1.19957	Down	0.00222052	0.006
SCAMP1	1	-1.2055	Down	0.00596529	0.01
ZFP36L2	1	-1.20935	Down	0.00348866	0.007
ANKRD28	1	-1.22308	Down	0.00602573	0.01
XKR6	1	-1.22774	Down	0.0122473	0.014
LMO2	1	-1.23196	Down	0.0170877	0.017
COL2A1	1	-1.2425	Down	0.00184589	0.005
KIAA1244	1	-1.24613	Down	0.0161113	0.016
EIF4G3	1	-1.24681	Down	0.00513574	0.009
TNFRSF11B	1	-1.24736	Down	0.0119679	0.014
TMEM117	4	-1.24923	Down	0.00848077	0.011
APOL6	1	-1.24972	Down	0.00101584	0.004
COL4A2	2	-1.25142	Down	0.000310454	0.003
MAGI2	1	-1.25442	Down	0.00482541	0.009
ALDH3B1	2	-1.25472	Down	0.0137249	0.015
DLGAP5	1	-1.26368	Down	0.00956667	0.012
SMAD7	1	-1.26593	Down	0.0122936	0.014
ZNF451	2	-1.27131	Down	0.0164235	0.017
EPB41L1	1	-1.27948	Down	0.0002283	0.003
ZCCHC24	4	-1.28058	Down	0.000127372	0.003
FGF12	2	-1.28102	Down	0.00822206	0.011
WASF2	1	-1.28637	Down	0.0081869	0.011
GOLGA2	1	-1.29286	Down	0.00749523	0.011
KCNS3	2	-1.29444	Down	0.00182762	0.005
THBS4	1	-1.31115	Down	0.000181836	0.003
SNX24	1	-1.33922	Down	0.0147469	0.015
ZNF521	1	-1.34383	Down	0.00665432	0.01
TAB2	1	-1.3481	Down	0.00346632	0.007
ANKRD13A	2	-1.35072	Down	0.000404928	0.003
HSD11B1	2	-1.35237	Down	0.00690756	0.01
GPSM2	1	-1.37855	Down	0.000626614	0.003
TTK	1	-1.38174	Down	0.0131549	0.015
NFATC3	1	-1.39621	Down	0.0114555	0.014
EPHA5	1	-1.39878	Down	0.00107774	0.004
GBP2	1	-1.40735	Down	0.00466661	0.008
C1orf213	1	-1.40776	Down	0.00581446	0.009
PTPN14	1	-1.41059	Down	0.00283795	0.006
PLD1	1	-1.42428	Down	0.00124886	0.005
TGFBR3	1	-1.42429	Down	0.00868638	0.012
DOCK11	1	-1.42583	Down	0.0108257	0.013
SYNJ2	1	-1.42952	Down	0.0126294	0.014
CTNNA2	2	-1.45918	Down	0.0121208	0.014
IDH2	2	-1.46049	Down	0.0091477	0.012
IRX5	2	-1.46144	Down	0.00851848	0.011
FBN2	2	-1.48933	Down	0.00168745	0.005
AKR1C3	1	-1.51589	Down	0.000137136	0.003
LYPD1	1	-1.51768	Down	0.00486981	0.009
NFE2	2	-1.52839	Down	0.00716812	0.01
ANGPTL2	3	-1.53506	Down	0.000102148	0.002
UACA	1	-1.5358	Down	0.0138676	0.015
SYNE2	1	-1.54226	Down	0.012381	0.014
PDGFRB	2	-1.5476	Down	0.000380574	0.003
BUB1	1	-1.56229	Down	0.0106654	0.013
ARHGAP44	1	-1.56393	Down	0.00274669	0.006
CCDC77	1	-1.5651	Down	0.014304	0.015
NR4A2	1	-1.57199	Down	0.00384641	0.008
C14orf132	1	-1.58655	Down	0.000703009	0.004
GAS2L3	1	-1.60228	Down	0.00714501	0.01
RBMS3	1	-1.60446	Down	0.00244795	0.006
TSC22D3	3	-1.60622	Down	0.00926226	0.012
SSPN	1	-1.62439	Down	0.00150928	0.005
ANGPT1	1	-1.62528	Down	0.000763536	0.004
CEP70	2	-1.62681	Down	0.00906807	0.012
GOLIM4	1	-1.65282	Down	0.0142794	0.015
PSIP1	1	-1.65819	Down	0.0153181	0.016
LMO7	1	-1.685	Down	7.72e-05	0.002
ORM1	1	-1.69399	Down	0.00264966	0.006
NTNG1	1	-1.69984	Down	0.0073194	0.011
TDO2	1	-1.73286	Down	0.00670615	0.01
DRAXIN	2	-1.74143	Down	0.00606766	0.01
TBC1D8	1	-1.74846	Down	0.000301796	0.003
BARX1	1	-1.76643	Down	0.00528146	0.009
NEURL1B	4	-1.80403	Down	0.00156931	0.005
CTSO	1	-1.80766	Down	0.00380076	0.008
RHOBTB3	2	-1.83405	Down	0.0130764	0.015
PIGN	1	-1.86796	Down	0.000560571	0.003
SYT13	2	-1.88931	Down	1.44e-05	0.001
METTL7A	1	-1.92813	Down	1.24e-05	0.001
ADCY8	1	-2.00453	Down	0.00328969	0.007
JAK2	1	-2.01548	Down	0.00341656	0.007
CSGALNACT1	2	-2.04236	Down	0.000130436	0.003
GPC6	1	-2.06515	Down	9.42e-05	0.002
ST8SIA4	1	-2.07078	Down	0.000165455	0.003
LOXL1	1	-2.11893	Down	0.013833	0.015
LRRC17	2	-2.42519	Down	0.000625163	0.003
NEK2	1	-2.43601	Down	0.0125	0.014
CYP1B1	1	-2.45988	Down	0.000816304	0.004
PROK2	1	-2.62005	Down	4.69e-05	0.002
CCDC102B	1	-2.82937	Down	0.00375732	0.007
ST8SIA1	1	-3.78607	Down	0.00275022	0.006
ASCL1	1	-0.406128	Down	0.0916131	0.09

## Sheet: SCLC_DEGS_withEBOX-S3B
Supplementary Table S3B: ASCL1 targets with EBOX (CAGCTG) in SCLC DEGs (n=177)
ASCL1 targets with its binding sites	No.of Ebox motifs	Log2 fold change	Regulation	p-value	q-value
TSPAN8	2	2.23584	Up	8.18e-10	0
RANBP17	1	2.11463	Up	1.53e-08	0
CHAC1	2	2.02711	Up	0.000234776	0
B3GALT2	1	1.85099	Up	5.74e-09	0
ENPP5	1	1.84585	Up	0.0288997	0
TRIB3	1	1.76489	Up	8.04e-09	0
RGS16	1	1.71109	Up	9.15e-07	0
CHMP4C	1	1.65516	Up	5.06e-08	0
ATF5	3	1.62021	Up	0.000159955	0
SLC7A5	1	1.60641	Up	1.3e-06	0
CEBPB	1	1.5787	Up	1.11e-09	0
THSD7A	2	1.56405	Up	1.08e-09	0
ZFAND1	1	1.5087	Up	0.00429863	0
PLEKHG5	3	1.46943	Up	4.08e-07	0
PCDH19	1	1.45377	Up	4.32e-06	0
MAGEA10	2	1.3934	Up	2.25e-05	0.001
C10orf25	1	1.37074	Up	0.00125919	0
PLEKHB1	1	1.35704	Up	4.46e-08	0
MGLL	1	1.30918	Up	1.1e-07	0
NTNG1	1	1.28282	Up	0.00024311	0
SERPINI1	4	1.26609	Up	4.36e-06	0
SIGLEC9	1	1.24231	Up	0.0429748	0
KCNH8	1	1.23107	Up	5.47e-07	0
LARP6	2	1.22348	Up	1.54e-09	0.005
PTP4A3	1	1.21891	Up	1.86e-07	0
BEX2	2	1.20665	Up	5.07e-06	0
N6AMT1	1	1.20026	Up	0.000244382	0.005
ASS1	1	1.15821	Up	0.000375809	0
HOXA1	1	1.14899	Up	1.15e-05	0
BSPRY	2	1.14712	Up	7.83e-08	0
DERL1	1	1.13021	Up	0.000527231	0
CCDC83	1	1.11415	Up	0.0187399	0.001
ATF3	1	1.10351	Up	1.05e-09	0.02
CPVL	1	1.09586	Up	1.89e-07	0
MDGA2	1	1.09067	Up	0.00653774	0
KRTCAP3	1	1.08798	Up	0.0185648	0.007
POLR3G	1	1.08138	Up	4.09e-10	0
PGM2L1	1	1.0663	Up	0.00013544	0.002
KCTD12	1	1.064	Up	4.71e-05	0
PPAT	1	1.04545	Up	0.000732843	0.002
MICALCL	1	1.04542	Up	0.000182297	0.001
FGL1	1	1.04025	Up	0.00065397	0
HOXB6	1	1.03807	Up	0.00634102	0.001
SLC19A2	1	1.02205	Up	2.13e-06	0
STOX1	1	-1.0058	Down	4.17e-05	0
SLC37A1	3	-1.00855	Down	6.42e-06	0
CORO2A	1	-1.01299	Down	0.00693287	0
PLEKHA6	1	-1.01363	Down	9.87e-07	0
TRERF1	1	-1.01384	Down	3.65e-10	0.008
C6orf47	2	-1.01907	Down	7.97e-07	0.002
NOP58	1	-1.01929	Down	3.09e-08	0
DHRS11	1	-1.02094	Down	9.39e-06	0
SOGA1	3	-1.02218	Down	2.94e-07	0
SEPN1	2	-1.02507	Down	7.78e-05	0
MAP2K1	2	-1.02815	Down	2.17e-05	0
MKNK1	1	-1.0307	Down	0.000200221	0
CTXN1	2	-1.03474	Down	0.000239556	0
CPT1A	1	-1.04094	Down	1.67e-09	0
SLC37A3	1	-1.04481	Down	5.09e-05	0.025
POLD2	1	-1.04485	Down	9.77e-09	0
MYH10	1	-1.04786	Down	6.73e-09	0
PLEKHH1	1	-1.05205	Down	0.000103432	0
ARID4A	1	-1.05484	Down	2.72e-09	0.001
MIOX	1	-1.05494	Down	0.00992392	0
VMA21	2	-1.05825	Down	5.38e-07	0
TJP2	2	-1.05971	Down	8.58e-09	0
JAZF1	2	-1.0603	Down	9.42e-06	0
SLC35F2	1	-1.06053	Down	2.38e-07	0
ZNF217	1	-1.06421	Down	9.48e-05	0.001
ATP10D	1	-1.06984	Down	6.24e-08	0
JAM2	1	-1.06986	Down	4.08e-08	0
PDE9A	1	-1.07131	Down	4.08e-05	0
HOXA13	1	-1.07503	Down	0.00063274	0
IQCG	1	-1.07507	Down	3.37e-06	0
AGPAT1	1	-1.07507	Down	2.97e-06	0.001
SCAP	1	-1.07888	Down	0.000651729	0
PBXIP1	1	-1.08184	Down	0.000109488	0
BMP2K	2	-1.08273	Down	3.87e-06	0
PFKFB3	1	-1.08397	Down	5.63e-05	0
SIX5	2	-1.08993	Down	2.15e-05	0
KIF1B	1	-1.09348	Down	4.98e-08	0
REEP3	1	-1.09538	Down	2.56e-05	0
FLOT2	1	-1.09628	Down	9.37e-06	0.021
SYT17	1	-1.1042	Down	2.31e-05	0
PSME1	1	-1.10613	Down	2.29e-06	0.018
KIAA1683	1	-1.12584	Down	0.00393347	0
SLC35F3	1	-1.13769	Down	0.0020991	0
HMGN5	1	-1.14648	Down	7.67e-07	0
PPP1R18	1	-1.15507	Down	0.000465037	0.044
ANKRD27	2	-1.15627	Down	3.14e-07	0
SETD7	1	-1.15853	Down	9.21e-10	0
ACTN1	1	-1.16337	Down	9.37e-10	0
MYD88	1	-1.17513	Down	0.000115487	0
SELENBP1	1	-1.18504	Down	3.74e-06	0
GATA6	2	-1.1942	Down	4.63e-07	0
ATCAY	1	-1.19489	Down	8.08e-08	0
RBBP9	1	-1.20533	Down	8.2e-07	0
CDK2AP1	4	-1.21187	Down	5.88e-05	0
PALMD	1	-1.2291	Down	1.63e-06	0
FADS1	1	-1.23025	Down	1.96e-07	0
GPM6B	1	-1.23135	Down	7.53e-07	0
MED21	1	-1.23576	Down	2.21e-10	0
GOLPH3L	1	-1.2369	Down	1.5e-08	0
GOLIM4	1	-1.23819	Down	2.03e-06	0
GSR	1	-1.24181	Down	3.09e-10	0
SRGAP3	1	-1.24386	Down	9.04e-06	0
RAB31	1	-1.24868	Down	0.00205782	0
ZNF436	1	-1.25987	Down	2.03e-06	0.001
GPR162	1	-1.26691	Down	0.000188129	0
SLC8A2	1	-1.26883	Down	3.41e-07	0
DTX3L	1	-1.2802	Down	3.56e-09	0
HS2ST1	2	-1.28831	Down	2.75e-08	0
TGFB1I1	1	-1.30107	Down	0.0167317	0
LNP1	1	-1.30809	Down	2.32e-07	0
APCDD1	1	-1.31115	Down	2.43e-05	0
VWA7	2	-1.3133	Down	0.00020606	0
NEURL1B	4	-1.32155	Down	8.89e-07	0
LRRC8B	3	-1.32497	Down	3.88e-05	0
CLNS1A	2	-1.32575	Down	9.32e-12	0
TOB1	1	-1.34666	Down	1.77e-05	0
MFGE8	3	-1.35052	Down	7.83e-08	0
ZCCHC14	2	-1.35873	Down	1.05e-08	0.039
LGALS1	1	-1.37664	Down	0.000308923	0
TMCO6	1	-1.37947	Down	5.15e-10	0
ARL3	1	-1.37957	Down	1.79e-06	0
FUT8	1	-1.39494	Down	1.06e-08	0.005
MXI1	3	-1.40688	Down	1.45e-07	0.019
HIF1A	2	-1.43876	Down	1.3e-11	0
CACNB3	1	-1.44116	Down	5.02e-09	0
EFNA3	3	-1.44456	Down	2.95e-05	0
IRS1	2	-1.47323	Down	5.67e-09	0
MOV10	1	-1.4848	Down	8.73e-08	0
NCKAP5	1	-1.48812	Down	0.00704917	0.001
HIPK2	1	-1.49012	Down	0.000110913	0
FAM127A	1	-1.5045	Down	8.04e-09	0
VCL	1	-1.50649	Down	1.46e-08	0.001
RNASE4	1	-1.51911	Down	6.67e-05	0
CYSTM1	1	-1.54086	Down	1.4e-07	0
TXLNB	1	-1.54716	Down	0.00820224	0
ZNF506	2	-1.56437	Down	0.00340901	0.009
KANK2	1	-1.56489	Down	7.93e-07	0
MLF2	1	-1.56564	Down	2.79e-07	0.004
RRAGA	1	-1.56729	Down	1.75e-09	0
KLHDC9	2	-1.56899	Down	5.59e-08	0
KISS1R	1	-1.57466	Down	0.000277689	0
CNIH2	1	-1.58973	Down	2.8e-08	0
CRIP2	1	-1.59032	Down	4.33e-07	0
FXYD6	1	-1.60263	Down	3.03e-06	0.002
GIMAP2	1	-1.61468	Down	0.00791452	0
SEPHS1	1	-1.61955	Down	3.74e-08	0
MBNL3	1	-1.63036	Down	1.05e-08	0
SLAIN1	2	-1.63209	Down	7.09e-08	0
MAGI2	1	-1.63445	Down	3.02e-09	0
CLDN11	1	-1.67069	Down	6.42e-07	0
GPR137C	1	-1.67448	Down	4.73e-12	0
ARHGEF3	1	-1.68766	Down	1.21e-08	0
PTPRF	1	-1.69675	Down	2.66e-08	0
GOLM1	1	-1.7109	Down	1.46e-07	0
METTL7A	1	-1.72456	Down	0.000482325	0
TMEM65	2	-1.75645	Down	4.83e-08	0
LYPD1	1	-1.79645	Down	2.92e-09	0
MICB	1	-1.8026	Down	5.82e-06	0
MBD2	1	-1.89843	Down	9.44e-11	0
GLIS2	1	-1.92125	Down	6.47e-07	0.001
LPPR4	1	-1.93083	Down	6.67e-12	0
MEA1	1	-1.9757	Down	1.78e-07	0
ASCL1	1	-2.01778	Down	3.06e-05	0
MLEC	1	-2.05862	Down	1.61e-11	0
IGFBP7	1	-2.07776	Down	8.52e-07	0
TIMP2	1	-2.12177	Down	9.63e-06	0
SCD5	1	-2.2943	Down	3.27e-07	0
CHIT1	1	-2.36389	Down	0.0220918	0.023
LOXL1	1	-2.48375	Down	2.03e-13	0
ZCCHC24	4	-2.74665	Down	1.46e-05	0
COL2A1	1	-3.22672	Down	1.6e-08	0
MDK	2	-3.8523	Down	5.99e-10	0
NXF3	1	-7.6113	Down	0.00418653	0.005
