# Supplementary material for: System analysis identifies distinct and common functional networks governed by transcription factor ASCL1, in glioma and small cell lung cancer
Source: Royal Society of Chemistry journal article supplement (doi:10.1039/c6mb00851h), 2017-05-18
Supplement: c6mb00851h1.zip [file c6mb00851h1.zip › Supplementary_Table_S4.xlsx]

## Sheet: TFs_Glioma Table S4A
Supplementary Table S4A: Transcription factors regulated by ASCL1 upon silencing in Glioma (n=46)
TF regulated by ASCL1 in glioma	Log2 fold change	Regulation	p-value	q-value	Binding site of TF
MAFF	1.46874	Up	0.000349068	0.003	TCAGCA
OSR1	1.10934	Up	0.00210387	0.006	CAGTAGC
ZGPAT	1.18133	Up	0.00284331	0.006
ZNF93	1.26788	Up	0.0106279	0.013
MXD1	1.22508	Up	0.00114613	0.004
FOSB	1.22385	Up	0.0128762	0.015
GRHL1	1.01998	Up	0.00520457	0.009	AACCGGTT
MXI1	-1.03245	Down	0.0119495	0.014
MXD3	-1.13965	Down	0.00147335	0.005
IRX5	-1.46144	Down	0.00851848	0.011	ACATGT
NFE2	-1.52839	Down	0.00716812	0.01	ATGA[C/G]TCA[T/C]
KLF4	-1.00127	Down	0.00206146	0.006	GGG[T/C]G[G/T]GGC
SATB1	-1.08872	Down	0.00143215	0.005
BBX	-1.09377	Down	0.00906056	0.012	TTCATGAA
TFAP2A	-1.10364	Down	0.000941104	0.004	GCCTCAGG
BNC1	-1.15077	Down	0.00793557	0.011
GLI3	-1.17048	Down	0.0005515	0.003
BNC2	-1.17926	Down	0.0133786	0.015
HOXD10	-1.19957	Down	0.00222052	0.006	[C/T]AATAAAA
LMO2	-1.23196	Down	0.0170877	0.017
MEF2C	-1.29782	Down	0.00225536	0.006	[T/C]AAAAATAG
NFATC3	-1.39621	Down	0.0114555	0.014	TTTCC[A/G]
GLIS3	-1.42844	Down	0.000379479	0.003	ACCCCCCACGAAG
BARX1	-1.76643	Down	0.00528146	0.009	[C/T]AATTA
NFIC	-1.02683	Down	0.00521076	0.009	TTGGC
NFIB	-1.03573	Down	0.00193548	0.005
AHR	-1.04103	Down	0.00605311	0.01	GCGTG
SMAD6	-1.05126	Down	0.00343324	0.007
TCF12	-1.05738	Down	0.00692602	0.01	ACAGCTG
FOXF1	-1.05749	Down	0.000621396	0.003
VDR	-1.06469	Down	0.000564494	0.003	GAGTTCA
DACH1	-1.07502	Down	0.00291691	0.006
EBF1	-1.09048	Down	0.00117278	0.004	CCCAAGGGA
FOXO1	-1.10991	Down	0.00161278	0.005	TCTTTAC
STAG2	-1.1452	Down	0.00800956	0.011
TCF21	-1.23017	Down	0.00530507	0.009	AACAGCTGTT
SIX4	-1.23319	Down	0.00231468	0.006	TGA[T/C]AC
TSHZ1	-1.24343	Down	0.00690789	0.01
TRPS1	-1.30967	Down	0.0153531	0.016
NFIA	-1.45052	Down	0.00110057	0.004	TGCCAA
GLI1	-1.49927	Down	0.00384339	0.008
NR4A2	-1.57199	Down	0.00384641	0.008	AGGTCAC
RAD21	-1.7782	Down	0.013403	0.015
MYBL1	-1.95652	Down	0.00170506	0.005
TSHZ2	-2.11426	Down	0.000452716	0.003	ACCGTTAAC
ASCL1	-0.406128	Down	0.0916131	0.09	CAGCTG

## Sheet: TFs_SCLC Table S4B
Supplementary Table S4B: Transcription factors regulated by ASCL1 upon silencing in SCLC (n=39)
TF regulated by ASCL1 in SCLC	Log2 fold change	Regulation	p-value	q-value	Binding site of TF
MYOG	6.11543	Up	0.0432641	0.044	CAGCTG
ATF5	1.62021	Up	0.000159955	0
CEBPB	1.5787	Up	1.11219e-09	0	[A/G]TT[G/T]CA[C/T][A/C]A[T/C]
KCNH8	1.23107	Up	5.47026e-07	0
DDIT3	1.18306	Up	2.10429e-05	0	TGCAAT
AKNA	1.17481	Up	0.000304289	0
HOXA1	1.14899	Up	1.15065e-05	0	TAATTA
ATF3	1.10351	Up	1.04587e-09	0.02	GATGACGT
HOXB6	1.03807	Up	0.00634102	0.001	GTAATTAC
TGIF1	-1.01656	Down	9.22164e-09	0	TGACAGCTGTCA
KLF9	-1.01743	Down	1.66178e-07	0		Promoter seqeunce not annotated in TRED and EPD databases
ZNF189	-1.0227	Down	3.43844e-06	0
SIM1	-1.04088	Down	0.0244559	0
ZNF217	-1.06421	Down	9.47929e-05	0.001
HOXA13	-1.07503	Down	0.00063274	0	C[C/T]AATAAA
SIX5	-1.08993	Down	2.15359e-05	0
SATB1	-1.15026	Down	1.4983e-05	0
MEIS3	-1.17663	Down	8.4845e-06	0	TGACA
GATA6	-1.1942	Down	4.63362e-07	0	GATAA[G/C]
HIVEP2	-1.19752	Down	1.30944e-05	0
NKX2-2	-1.275	Down	4.50035e-05	0		Promoter seqeunce not annotated in TRED and EPD databases
PITX1	-1.29674	Down	3.02929e-07	0	TAATCC
TGFB1I1	-1.30107	Down	0.0167317	0
IRF2	-1.34271	Down	9.45485e-08	0	GAAAG
NFIX	-1.35539	Down	4.82166e-06	0.002	GCCAA
MXI1	-1.40688	Down	1.44895e-07	0.019
HIF1A	-1.43876	Down	1.29912e-11	0	[A/G]CGTG
ZEB2	-1.44758	Down	2.04808e-07	0.001
RCOR1	-1.61848	Down	2.7544e-11	0
ZHX2	-1.66439	Down	2.39971e-08	0
CTBP2	-1.66607	Down	1.25201e-06	0
PBX1	-1.70111	Down	3.37687e-08	0.004	ATCAATCA
FOXN3	-1.70657	Down	2.7726e-11	0
IRX3	-1.75325	Down	1.67582e-06	0	TACATGTA
ZNF467	-1.85563	Down	0.000881521	0
GLIS2	-1.92125	Down	6.47025e-07	0.001	ACCCCCC[G/A]C[G/A]
ASCL1	-2.01778	Down	3.05564e-05	0	CAGCTG
ZNF80	-3.67174	Down	0.0101666	0.011
ZNF69	-4.23615	Down	0.0164513	0.017
