# Supplementary material for: System analysis identifies distinct and common functional networks governed by transcription factor ASCL1, in glioma and small cell lung cancer
Source: Royal Society of Chemistry journal article supplement (doi:10.1039/c6mb00851h), 2017-05-18
Supplement: c6mb00851h1.zip [file c6mb00851h1.zip › Supplementary_Table_S5.xlsx]

## Sheet: WGCNA validationTable S5A_B
Supplementary Table S5A: Glioma gene co-expression modules validation
Modules	Zsummary	Log.psummary
Blue	5.7447	-12.0905
Turquoise	17.5176	-114.052
Gold	0.816744	-0.690843
Supplementary Table S5B: SCLC gene co-expression modules validation
Modules	Zsummary	Log.psummary
Blue	10.5962	-28.3634
Brown	1.55532	-1.72469
Turquoise	11.0839	-31.8999
Yellow	4.51583	-5.62464
Gold	0.416121	-0.470281
Note	Gold module is random sample network
