# Supplementary material for: System analysis identifies distinct and common functional networks governed by transcription factor ASCL1, in glioma and small cell lung cancer
Source: Royal Society of Chemistry journal article supplement (doi:10.1039/c6mb00851h), 2017-05-18
Supplement: c6mb00851h1.zip [file c6mb00851h1.zip › Supplementary_Table_S6.xlsx]

## Sheet: Hubsgliomacoexpressnet TableS6A
Supplementary TableS6A: Top 5% hubs in glioma gene co-expression module 1 (n=30)
Genes	kMEblue	Log2 fold change	Regulation
SLC4A2	0.998873	1.27816	Up
CCNE1	0.997629	1.146	Up
MAST4	0.99664	1.13014	Up
FLCN	0.996631	1.14473	Up
MAFF	0.996091	1.46874	Up
DHRS7C	0.995885	9.62016	Up
ATXN1L	0.995632	1.1631	Up
TMEM177	0.99545	1.23093	Up
SERPINB8	0.994096	1.19622	Up
RCE1	0.993942	1.03708	Up
KRTAP7-1	0.993606	2.21549	Up
ANGPTL4	0.993585	1.1252	Up
PPAN	0.993558	1.48666	Up
NAF1	0.993442	1.40514	Up
C11orf84	0.993351	1.10797	Up
PHLDA2	0.992825	1.22796	Up
SPSB1	0.992135	1.17022	Up
SF3B4	0.991738	1.40905	Up
SPATA2L	0.990971	1.74727	Up
SH2D5	0.990802	1.25067	Up
OSR1	0.989599	1.10934	Up
LRRC33	0.988895	1.36434	Up
WIBG	0.988806	1.02434	Up
DGCR11	0.988611	1.13511	Up
LEP	0.987794	1.25957	Up
OSCP1	0.987154	1.00956	Up
INO80C	0.986943	1.23559	Up
TMEM44-AS1	0.986889	1.17141	Up
PWWP2B	0.986442	1.0074	Up
TSPAN10	0.986106	1.14352	Up

## Sheet: Hubsgliomacoexpressnet TableS6B
Supplementary TableS6B: Top 5% hubs in glioma gene co-expression module 2 (n=32)
Genes	kMEturquoise	Log2 fold change	Regulation
PIGN	0.998731	-1.86796	Down
NFIB	0.998648	-1.03573	Down
AIM1	0.998383	-1.17261	Down
IL15	0.998363	-1.15824	Down
GLIS3	0.997936	-1.42844	Down
CASC5	0.997885	-1.57598	Down
ARHGAP28	0.997569	-1.54324	Down
LRRC17	0.997233	-2.42519	Down
TSHZ2	0.997157	-2.11426	Down
GXYLT2	0.996977	-1.53314	Down
SEC24A	0.996811	-1.61655	Down
FAM102B	0.996645	-1.43938	Down
DCC	0.996519	-1.39853	Down
ANKRD13A	0.996259	-1.35072	Down
MKI67	0.996117	-1.47284	Down
TRERF1	0.995986	-1.13067	Down
APOL6	0.995695	-1.24972	Down
GPC6	0.995383	-2.06515	Down
SIPA1L2	0.995221	-1.23826	Down
SLC1A3	0.994964	-1.06546	Down
PLD1	0.994911	-1.42428	Down
NCOA6	0.994763	-1.25099	Down
LPPR4	0.994131	-1.24702	Down
LOC646903	0.993972	-1.18826	Down
ASAP1	0.993532	-1.14826	Down
ALCAM	0.993517	-1.22231	Down
ENAH	0.993437	-1.00538	Down
TBC1D8	0.993179	-1.74846	Down
ATP6AP1L	0.993101	-1.41188	Down
MXD3	0.99276	-1.13965	Down
KIF11	0.954325	-1.09639	Down
CDC25C	0.94424	-1.23208	Down
