# Supplementary material for: System analysis identifies distinct and common functional networks governed by transcription factor ASCL1, in glioma and small cell lung cancer
Source: Royal Society of Chemistry journal article supplement (doi:10.1039/c6mb00851h), 2017-05-18
Supplement: c6mb00851h1.zip [file c6mb00851h1.zip › Supplementary_Table_S7.xlsx]

## Sheet: HubsSCLCcoexpression_TableS7A 
Supplementary TableS7A: Top 5% hubs in SCLC gene co-expression module 1 (n=28)
Genes	kMEblue	Log2 fold change	Regulation
MICB	0.998701	-1.8026	Down
ARL3	0.998193	-1.37957	Down
MAP3K3	0.997793	-2.19194	Down
LRRC8A	0.997571	-1.08434	Down
CAMK2D	0.997181	-1.09771	Down
TIMP2	0.997112	-2.12177	Down
GTF3A	0.997053	-1.06534	Down
CD59	0.996923	-1.0474	Down
MLF2	0.996368	-1.56564	Down
ALKBH7	0.995706	-1.21604	Down
TRIM41	0.995281	-1.32841	Down
USP16	0.995269	-1.33943	Down
FXYD6	0.995261	-1.60263	Down
LSM1	0.994912	-1.28904	Down
JAZF1	0.994725	-1.0603	Down
MEA1	0.994433	-1.9757	Down
ENY2	0.994223	-1.42678	Down
ZNF189	0.993507	-1.0227	Down
LNP1	0.993447	-1.30809	Down
PDLIM3	0.992969	-1.23814	Down
FLOT2	0.99291	-1.09628	Down
ADSSL1	0.99238	-2.89344	Down
IRF2	0.992116	-1.34271	Down
KANK2	0.991895	-1.56489	Down
CXXC5	0.991452	-1.56928	Down
RBBP9	0.991148	-1.20533	Down
MXI1	0.990757	-1.40688	Down
HIP1	0.990751	-1.61599	Down

## Sheet: HubsSCLCcoexpression_TableS7B
Supplementary TableS7B: Top 5% hubs in SCLC gene co-expression module 2 (n=30)
Genes	kMEturquoise	Log2 fold change	Regulation
TBL1XR1	0.997512	-1.48157	Down
DTX3L	0.995563	-1.2802	Down
HIF1A	0.995242	-1.43876	Down
FNDC3A	0.995147	-1.48998	Down
FBXO21	0.994986	-1.37987	Down
ACTN1	0.99489	-1.16337	Down
TNRC6B	0.994784	-1.16153	Down
SERP1	0.994756	-2.04406	Down
RCOR1	0.994664	-1.61848	Down
XK	0.993843	-1.50296	Down
LYSMD2	0.993836	-1.36246	Down
TMCO1	0.993786	-1.56829	Down
CLNS1A	0.993442	-1.32575	Down
CELSR2	0.9933	-1.05481	Down
APLP2	0.992973	-2.45866	Down
PALLD	0.992952	-1.58272	Down
TMEM38B	0.992937	-1.54344	Down
SUSD5	0.992792	-3.0428	Down
ZCCHC14	0.992756	-1.35873	Down
LYPD1	0.992617	-1.79645	Down
LOXL1	0.992605	-2.48375	Down
TJP2	0.992587	-1.05971	Down
RNF130	0.992417	-1.2616	Down
MED21	0.992155	-1.23576	Down
MEGF9	0.991857	-1.04879	Down
YBX2	0.991684	-1.81542	Down
PPP6R3	0.991431	-1.1371	Down
ATP2B4	0.991038	-1.01259	Down
GPR137C	0.990856	-1.67448	Down
FHL1	0.987723	-1.06508	Down

## Sheet: HubsSCLCcoexpression_TableS7C
Supplementary TableS7C: Top 5% hubs in SCLC gene co-expression module 3 (n=29)
Genes	kMEbrown	Log2 fold change	Regulation
TSPAN8	0.99443	2.23584	Up
LINC00673	0.992978	1.6283	Up
PLEKHB1	0.992745	1.35704	Up
CD55	0.991876	1.73724	Up
GALNT3	0.991773	2.31709	Up
LARP6	0.990239	1.22348	Up
BSPRY	0.98723	1.14712	Up
B3GNT5	0.987123	1.66986	Up
PTP4A3	0.986881	1.21891	Up
PON3	0.985455	1.00909	Up
MTHFD1L	0.983052	1.02494	Up
TRIB3	0.98119	1.76489	Up
UBE2QL1	0.979655	1.75898	Up
RAB3B	0.977519	2.05393	Up
B3GALT2	0.976205	1.85099	Up
POLR3G	0.972594	1.08138	Up
CEBPB	0.972559	1.5787	Up
KCNH8	0.970633	1.23107	Up
ATF3	0.969381	1.10351	Up
VSIG1	0.969006	1.06548	Up
SCNN1G	0.967283	4.93614	Up
DFFB	0.967147	1.10135	Up
CHMP4C	0.966908	1.65516	Up
TMPRSS3	0.965735	1.09187	Up
PRKAB2	0.964877	1.00611	Up
OSTF1	0.964784	1.83194	Up
PLEKHG5	0.964032	1.46943	Up
BEX2	0.963529	1.20665	Up
GPX2	0.962616	1.1388	Up

## Sheet: HubsSCLCcoexpression_TableS7D
Supplementary TableS7D: Top 5% hubs in SCLC gene co-expression module 4 (n=29)
Genes	kMEyellow	Log2 fold change	Regulation
ASCL1	0.997379	-2.01778	Down
SESN2	0.995683	1.8367	Up
MCTP2	0.993832	1.09664	Up
FAM129A	0.988972	1.00104	Up
CHAC1	0.987911	2.02711	Up
KCTD12	0.987125	1.064	Up
POSTN	0.986567	1.64292	Up
SHMT2	0.98457	1.08649	Up
HEPACAM2	0.984493	2.69047	Up
NTNG1	0.984236	1.28282	Up
AKNA	0.982942	1.17481	Up
RGS16	0.982564	1.71109	Up
SLC19A2	0.980058	1.02205	Up
PCLO	0.980003	1.23849	Up
SERPINI1	0.978246	1.26609	Up
ATF5	0.97804	1.62021	Up
RHOB	0.974499	1.06753	Up
FKBP1B	0.973215	1.53036	Up
MAGEA10	0.972147	1.3934	Up
PROM1	0.97002	1.06331	Up
UNC5B	0.968486	1.11777	Up
UBIAD1	0.959717	1.10037	Up
SLC7A5	0.959274	1.60641	Up
SLC3A2	0.957459	1.4996	Up
MACROD2	0.956744	1.15023	Up
AKR1C2	0.953648	2.28031	Up
COTL1	0.951802	1.0275	Up
TMED4	0.948325	1.23469	Up
UHMK1	0.947935	1.20713	Up
