# Supplementary material for: System analysis identifies distinct and common functional networks governed by transcription factor ASCL1, in glioma and small cell lung cancer
Source: Royal Society of Chemistry journal article supplement (doi:10.1039/c6mb00851h), 2017-05-18
Supplement: c6mb00851h1.zip [file c6mb00851h1.zip › Supplementary_Table_S8.xlsx]

## Sheet: TableS8A_SB
Supplementary Table S8A:Statistically significant biological process enriched in glioma module 1
Biological process	Log p-value	Genes involved in biological process
positive regulation of monocyte chemotactic protein-1 production	-3.6231	IL1B,ADIPOQ
response to L-ascorbic acid	-3.40307	IL1B,LEP
monocyte aggregation	-3.40307	HAS2,IL1B
response to cytokine	-3.16974	CCNE1,CEBPA,CSF3,HAS2,IL1B,LEP,CCL20,SPHK1,ADIPOQ,TNFSF15,IL24,IL36RN,CD274,IRG1
regulation of monocyte chemotactic protein-1 production	-3.08447	IL1B,ADIPOQ
regulation of endocrine process	-2.71298	IL1B,LEP,LIF
cellular response to lipopolysaccharide	-2.70907	CSF3,IL1B,CCL20,IL24,IRG1
regulation of cell migration	-2.67455	HAS2,IL1B,CCL20,PHLDA2,SPHK1,ADIPOQ,IL24,CD274,SMURF2,PARD6B,FLCN
endocrine hormone secretion	-2.61996	IL1B,LEP,LIF
regulation of cell motility	-2.48759	HAS2,IL1B,CCL20,PHLDA2,SPHK1,ADIPOQ,IL24,CD274,SMURF2,PARD6B,FLCN
positive regulation of transcription factor import into nucleus	-2.40367	CSF3,IL1B,SPHK1
positive regulation of hemopoiesis	-2.39959	CSF3,IL1B,LEP,LIF,ATXN1L
cellular response to biotic stimulus	-2.39959	CSF3,IL1B,CCL20,IL24,IRG1
regulation of hemopoiesis	-2.37808	CSF3,IL1B,LEP,LIF,ADIPOQ,FLCN,ATXN1L
regulation of histone acetylation	-2.35553	IL1B,LIF,FLCN
interleukin-1 production	-2.12298	IL1B,CCL20,SPHK1
tyrosine phosphorylation of Stat3 protein	-2.71298	LEP,LIF,IL24
regulation of peptidyl-tyrosine phosphorylation	-2.6768	CSF3,LEP,LIF,ADIPOQ,IL24,ZGPAT
positive regulation of peptidyl-tyrosine phosphorylation	-2.52833	CSF3,LEP,LIF,ADIPOQ,IL24
regulation of nephron tubule epithelial cell differentiation	-2.52545	LIF,OSR1
nephron tubule epithelial cell differentiation	-2.39997	LIF,OSR1
positive regulation of tyrosine phosphorylation of STAT protein	-2.3094	LEP,LIF,IL24
regulation of JAK-STAT cascade	-2.28612	LEP,LIF,IL24,DOT1L
tyrosine phosphorylation of STAT protein	-2.06738	LEP,LIF,IL24
negative regulation of ERK1 and ERK2 cascade	-2.40367	LIF,ADIPOQ,FLCN
regulation of carbohydrate metabolic process	-3.19594	HAS2,LEP,PHLDA2,ADIPOQ,UGT1A6,SIK1
regulation of gluconeogenesis	-2.81416	LEP,ADIPOQ,SIK1
regulation of lipid metabolic process	-2.08713	CHRM5,IL1B,LEP,ADIPOQ,UGT1A6,SIK1
placenta development	-2.65531	CEBPA,LEP,LIF,PHLDA2,NSDHL
Supplementary Table S8B: Statistically significant biological process enriched in module 2
Biological process	Log p-value	Genes involved in biological process
organ morphogenesis	-9.24915	SHROOM2,BMP6,BMPR1B,CNGA3,COL1A2,COL2A1,COL11A1,CTNNA2,EYA1,FBN2,EFEMP1,FGF7,FOXF1,GLI1,GLI3,HOXD10,HSPG2,ID3,SMAD7,MEF2C,MGP,MKI67,NFIB,NFIC,TNFRSF11B,PDGFRB,PTN,TCF21,TFAP2A,TGFBR3,TRPS1,VDR,MAGI2,TSHZ1,IRX5,SYCP2,SEMA3C,PLXND1,FLRT2,ANKRD11,SIX4,TMEM100,LGR4,CHRNA9,CSGALNACT1,CYP26B1,HEG1,NTN4,FAT4
embryo development	-4.93465	ADAR,ANGPT1,COL2A1,COL4A2,COL11A1,COL12A1,EYA1,FBN2,EFEMP1,FOXF1,GLI1,GLI3,HOXD10,HSPG2,ID3,ITGAV,LMO2,SMAD6,MEF2C,NEK2,PDGFRB,TCF21,TFAP2A,TOP2A,KLF4,TSHZ1,IRX5,SEMA3C,NCOA6,PLCB1,MACF1,ANKRD11,SIX4,TMEM100,CHRNA9,ENAH,CYP26B1,HEG1,HOPX,RSPO3,PHLDB2
palate development	-2.78893	COL2A1,GLI3,MEF2C,TCF21,TFAP2A,TGFBR3,TSHZ1
circulatory system development	-7.65275	AHR,ANGPT1,COL1A2,COL2A1,COL4A2,COL11A1,COL15A1,CYP1B1,EGF,EYA1,FGF12,FOXF1,FOXO1,GLI3,HSPG2,ID3,ITGAV,LOXL1,SMAD7,MEF2C,NFATC3,NOTCH3,PDGFRB,PTPN14,TCF21,TGFBR3,THBS4,TRPS1,SEMA5A,KLF4,WASF2,SEMA3C,NCOA6,TAB2,PLXND1,FLRT2,RGCC,PLCE1,TMEM100,HEG1,PROK2,FAT4,APOLD1,HOPX,RSPO3
cardiovascular system development	-7.65275	AHR,ANGPT1,COL1A2,COL2A1,COL4A2,COL11A1,COL15A1,CYP1B1,EGF,EYA1,FGF12,FOXF1,FOXO1,GLI3,HSPG2,ID3,ITGAV,LOXL1,SMAD7,MEF2C,NFATC3,NOTCH3,PDGFRB,PTPN14,TCF21,TGFBR3,THBS4,TRPS1,SEMA5A,KLF4,WASF2,SEMA3C,NCOA6,TAB2,PLXND1,FLRT2,RGCC,PLCE1,TMEM100,HEG1,PROK2,FAT4,APOLD1,HOPX,RSPO3
blood vessel development	-7.40817	AHR,ANGPT1,COL1A2,COL4A2,COL15A1,CYP1B1,EGF,EYA1,FOXF1,FOXO1,GLI3,HSPG2,ITGAV,LOXL1,SMAD7,MEF2C,NFATC3,NOTCH3,PDGFRB,TCF21,THBS4,SEMA5A,KLF4,WASF2,SEMA3C,NCOA6,PLXND1,RGCC,TMEM100,HEG1,PROK2,APOLD1,RSPO3
angiogenesis	-3.91583	ANGPT1,COL4A2,COL15A1,CYP1B1,EGF,HSPG2,ITGAV,NFATC3,NOTCH3,PDGFRB,TCF21,THBS4,SEMA5A,KLF4,WASF2,PLXND1,RGCC,TMEM100,PROK2,APOLD1,RSPO3
axon development	-6.56252	ALCAM,ANGPT1,ANK1,BMPR1B,COL2A1,COL4A2,CTNNA2,DCC,EGF,EPHA5,FGF7,FGF13,GLI3,ITGAV,JAK2,KIF5C,MAP2,MATN2,NFIB,NR4A2,PDGFRB,SDC2,SOS1,ST8SIA4,ULK1,STK24,SEMA5A,NREP,PLPPR4,SEMA3C,PLXND1,MACF1,FLRT2,ENAH,TENM2,NTN4,NTNG2,LINGO2,DRAXIN
cell morphogenesis involved in neuron differentiation	-6.26931	ALCAM,ANGPT1,ANK1,BMPR1B,COL2A1,COL4A2,CTNNA2,DCC,EGF,EPHA5,FGF7,FGF13,GLI3,ITGAV,JAK2,KIF5C,MAP2,MATN2,MEF2C,NFIB,NR4A2,PDGFRB,SDC2,SLC1A3,SOS1,ST8SIA4,ULK1,SEMA5A,PLPPR4,SEMA3C,NLGN1,PLXND1,MACF1,FLRT2,ENAH,TENM2,NTN4,NTNG2,LINGO2,DRAXIN
neuron projection morphogenesis	-5.4745	ALCAM,ANGPT1,ANK1,BMPR1B,COL2A1,COL4A2,CTNNA2,DCC,EGF,EPHA5,FGF7,FGF13,GLI3,GPM6A,ITGAV,JAK2,KIF5C,MAP2,MATN2,NFIB,NR4A2,PDGFRB,SDC2,SOS1,ST8SIA4,ULK1,SEMA5A,PLPPR4,SEMA3C,NLGN1,PLXND1,MACF1,FLRT2,ENAH,TENM2,NTN4,NTNG2,LINGO2,DRAXIN
cell division	-6.35618	ZFP36L2,BUB1,CDC25C,EGF,FGF7,FGF13,GOLGA2,KIF11,NEK2,PDGFRB,PTN,RAD21,THBS4,TOP2A,TTK,PRC1,SMC3,DLGAP5,KIF14,KIF20A,SYCP2,TXNIP,STAG2,POGZ,PLCB1,CKAP2,RGCC,NUSAP1,MIS18BP1,CENPJ,CASC5,KNSTRN,CCNY,ASPM
mitotic sister chromatid segregation	-4.59586	BUB1,NEK2,TTK,SMC3,CEP57,DLGAP5,KIF14,POGZ,NUSAP1,KIF18A,KNSTRN
chromosome segregation	-4.5785	BUB1,KIF11,NEK2,RAD21,TOP2A,TTK,SMC3,CEP57,DLGAP5,KIF14,SYCP2,STAG2,POGZ,NUSAP1,CASC5,KIF18A,KNSTRN
mitotic nuclear division	-4.2945	BUB1,CDC25C,EGF,GOLGA2,KIF11,NEK2,PDGFRB,RAD21,TTK,SMC3,CEP57,DLGAP5,KIF14,STAG2,POGZ,RGCC,NUSAP1,MIS18BP1,CASC5,KIF18A,KNSTRN,ASPM
regulation of cell division	-4.24543	BUB1,CDC25C,EGF,FGF7,KIF11,NEK2,PDGFRB,PTN,THBS4,TTK,DLGAP5,KIF14,TXNIP,PLCB1,RGCC,NUSAP1,CCNY,ASPM
mitotic cell cycle process	-4.196	BUB1,CDC25C,CENPA,EGF,EYA1,GOLGA2,ID4,KIF11,NEK2,PDGFRB,RAD21,TOP2A,TTK,PRC1,SMC3,CEP57,DLGAP5,KIF14,KIF20A,STAG2,CEP152,POGZ,PLCB1,CKAP2,RGCC,GPSM2,NUSAP1,MIS18BP1,CENPJ,CASC5,CEP70,KIF18A,KNSTRN,CCNY,ASPM
positive regulation of cell division	-3.52971	EGF,FGF7,PDGFRB,PTN,THBS4,DLGAP5,KIF14,PLCB1,RGCC,NUSAP1
microtubule cytoskeleton organization	-6.21764	CENPA,EYA1,FGF13,GOLGA2,KIF11,MAP2,NEK2,TTK,PRC1,SMC3,CEP57,KIF14,KIF20A,CEP152,CKAP2,GPSM2,NUSAP1,CENPJ,CASC5,KIF18A,NAV1,PHLDB2,KNSTRN,SSX2IP,ASPM,GAS2L3
microtubule-based process	-5.76905	CENPA,EYA1,FGF13,GOLGA2,KIF5C,KIF11,MAP2,NEK2,TTK,PRC1,SMC3,CEP57,DLGAP5,KIF14,KIF20A,ICK,CEP152,MACF1,CKAP2,GPSM2,NUSAP1,CENPJ,CASC5,KIF18A,NAV1,PHLDB2,KNSTRN,SSX2IP,LCA5,ASPM,GAS2L3
microtubule binding	-5.55005	FGF13,GLI1,GOLGA2,KIF5C,KIF11,MAP2,PRC1,CEP57,KIF14,KIF20A,MTUS2,MACF1,NUSAP1,REEP1,KIF18A,GAS2L3
tubulin binding	-5.06048	FGF13,GLI1,GOLGA2,KIF5C,KIF11,MAP2,PDE4B,PRC1,CEP57,KIF14,KIF20A,MTUS2,MACF1,NUSAP1,CENPJ,REEP1,KIF18A,GAS2L3
glycosaminoglycan biosynthetic process	-5.39241	ANGPT1,EGF,HSPG2,PDGFRB,SDC2,CHST1,GPC6,ST3GAL6,GALNT5,CSGALNACT1,CEMIP,CHSY3
aminoglycan biosynthetic process	-5.35293	ANGPT1,EGF,HSPG2,PDGFRB,SDC2,CHST1,GPC6,ST3GAL6,GALNT5,CSGALNACT1,CEMIP,CHSY3
extracellular matrix organization	-5.25294	COL1A2,COL2A1,COL4A2,COL11A1,COL12A1,COL15A1,CYP1B1,FBN2,EFEMP1,FOXF1,HSPG2,ITGAV,LOXL1,LTBP1,MFAP4,TNFRSF11B,SDC2,FLRT2,RGCC,CSGALNACT1,NTN4,PHLDB2,OLFML2A
transcriptional activator activity, RNA polymerase II transcription regulatory region sequence-speci	-5.03251	EBF1,FOXF1,GLI3,LMO2,MEF2C,MYBL1,NFIA,NFATC3,NFIB,NFIC,NR4A2,RAD21,TCF12,TCF21,TFAP2A,TRPS1,KLF4,STAG2,SIX4,BARX1

## Sheet: TableS8C-F
Supplementary Table S8C:Statistically significant biological process enriched in SCLC module 1
Biological process	Log p-value	Genes involved in biological process
neuron projection morphogenesis	-3.54559	CAMK2D,COL2A1,DAG1,DNM1,EFNA4,GJA1,MATN2,PSMB9,PSME1,RRAS,KL,ARPC1B,ARPC2,SYT17,METRN,ANKRD27,LINGO1,UNC5A,AGRN
axon development	-3.17834	CAMK2D,COL2A1,DAG1,DNM1,EFNA4,MATN2,PSMB9,PSME1,PTPRF,RRAS,KL,ARPC1B,ARPC2,METRN,LINGO1,UNC5A,AGRN
cell morphogenesis involved in neuron differentiation	-2.86802	CAMK2D,COL2A1,DAG1,DNM1,EFNA4,MATN2,PSMB9,PSME1,RRAS,KL,ARPC1B,ARPC2,METRN,ANKRD27,LINGO1,UNC5A,AGRN
regulation of cell development	-3.52725	DAG1,GBP1,CITED1,NKX2-2,PTPRF,SNAP25,TEAD3,TGFB1,TGFB1I1,TIMP2,ARPC2,LSM1,ASAP1,SYT17,METRN,IRX3,ANKRD27,LINGO1,RHOQ,RAB8B,AGRN,RRAS,ANKRD6,STOX1,LTBP3
regulation of cell morphogenesis involved in differentiation	-2.60424	DAG1,GBP1,CITED1,TGFB1,TGFB1I1,ARPC2,METRN,ANKRD27,LINGO1
regulation of neuron differentiation	-2.22368	NKX2-2,PTPRF,SNAP25,TIMP2,LSM1,ASAP1,SYT17,METRN,IRX3,ANKRD27,LINGO1
regulation of cell projection organization	-2.21748	PTPRF,SNAP25,ARPC2,RHOQ,ASAP1,SYT17,RAB8B,METRN,ANKRD27,LINGO1,AGRN
positive regulation of cell development	-2.18704	NKX2-2,TEAD3,TGFB1,TGFB1I1,TIMP2,ARPC2,SYT17,METRN,IRX3,ANKRD27
regulation of response to extracellular stimulus	-3.21286	BNIP3L,FZD5,KANK2,KIAA1324,PHF23,MAP1LC3B
regulation of response to nutrient levels	-3.21286	BNIP3L,FZD5,KANK2,KIAA1324,PHF23,MAP1LC3B
regulation of macroautophagy	-2.83108	BNIP3L,FZD5,KIAA1324,PHF23,MAP1LC3B
regulation of mitophagy	-2.20704	BNIP3L,FZD5,MAP1LC3B
cell communication involved in cardiac conduction	-3.20093	CAMK2D,CXADR,GJA1,SRI
regulation of muscle adaptation	-2.72064	CAMK2D,PDE9A,TNNT1,SEPN1
cardiac conduction	-2.69368	CAMK2D,CXADR,GJA1,SRI
regulation of actin filament-based movement	-2.04595	CAMK2D,GJA1,SRI
regulation of cardiac conduction	-2.00642	CAMK2D,SRI
positive regulation of stem cell differentiation	-3.05662	LTBP3,TEAD3,TGFB1,TGFB1I1
regulation of stem cell differentiation	-2.44515	DAG1,LTBP3,TEAD3,TGFB1,TGFB1I1
negative regulation of protein localization to cell periphery	-3.02276	GBP1,TGFB1,RHOQ
Supplementary Table S8D:Statistically significant biological process enriched in SCLC module 2
Biological process	Log p-value	Genes involved in biological process
positive regulation of transcription from RNA polymerase II promoter in response to endoplasmic reti	-4.888	ATF3,CEBPB,DDIT3
regulation of fat cell differentiation	-3.169	CEBPB,DDIT3,DACT1,TRIB3
intrinsic apoptotic signaling pathway in response to endoplasmic reticulum stress	-2.799	CEBPB,DDIT3,TRIB3
PERK-mediated unfolded protein response	-2.594	ATF3,DDIT3
response to endoplasmic reticulum stress	-2.48	ATF3,CEBPB,DDIT3,WIPI1,TRIB3
regeneration	-4.356	ANXA3,CEBPB,LIFR,MYOG,PPAT,EYS
glutamine catabolic process	-4.332	GLS,PPAT
alpha-amino acid biosynthetic process	-3.537	ASS1,GCH1,GLS,MTHFD1L
folic acid-containing compound biosynthetic process	-2.928	GCH1,MTHFD1L
glutamine family amino acid biosynthetic process	-2.549	ASS1,GLS
tetrahydrofolate metabolic process	-2.507	GCH1,MTHFD1L
regulation of superoxide metabolic process	-2.467	GCH1,PON3
alpha-amino acid metabolic process	-2.437	ASS1,GCH1,GLS,PPAT,MTHFD1L
dicarboxylic acid metabolic process	-2.131	ASS1,GLS,MTHFD1L
embryonic neurocranium morphogenesis	-3.491	HOXA1,MTHFD1L
regulation of mitotic spindle assembly	-2.999	CHMP2B,CHMP4C
regulation of spindle organization	-2.392	CHMP2B,CHMP4C
regulation of centrosome duplication	-2.201	CHMP2B,CHMP4C
regulation of centrosome cycle	-2.07	CHMP2B,CHMP4C
mitotic metaphase plate congression	-2.046	CHMP2B,CHMP4C
Supplementary Table S8E:Statistically significant biological process enriched in SCLC module 3
Biological process	Log p-value	Genes involved in biological process
regulation of hormone biosynthetic process	-2.943	HIF1A,DKK3,TRERF1
regulation of hormone metabolic process	-2.423	HIF1A,DKK3,TRERF1
regulation of mesenchymal cell apoptotic process	-2.009	HIF1A,HOXA13
mesenchymal cell apoptotic process	-2.009	HIF1A,HOXA13
mitotic nuclear division	-2.867	CCNG1,GEM,HOXA13,MAP2K1,DYNLT3,CCNA1,ARHGEF10,CIT,OIP5,LATS2,LRRCC1,REEP3,CENPW
cellular response to growth factor stimulus	-2.774	CD19,AP2M1,GATA6,HIF1A,HOXA13,IRS1,MOV10,MAP2K1,PSMC2,RAC1,TGIF1,TIAM1,MKNK1,MAGI2,TOB1,PEG10,TNRC6B,FLRT1,HIPK2,ARHGEF3,BCL9L
response to growth factor	-2.646	CD19,AP2M1,GATA6,HIF1A,HOXA13,IRS1,MOV10,MAP2K1,PSMC2,RAC1,TGIF1,TIAM1,MKNK1,MAGI2,TOB1,PEG10,TNRC6B,FLRT1,HIPK2,ARHGEF3,BCL9L
transmembrane receptor protein tyrosine kinase signaling pathway	-2.501	APLP2,APP,CD19,AP2M1,EFNA3,HIF1A,IRS1,MOV10,MYH10,MAP2K1,PSMC2,RAC1,TIAM1,MKNK1,ARPC1A,RRAGA,TNRC6B,FLRT1,ARHGEF3,CRIM1,SOGA1
neurotrophin signaling pathway	-2.075	CD19,AP2M1,IRS1,MOV10,MAP2K1,PSMC2,RAC1,TIAM1,MAGI2,TNRC6B,ARHGEF3
growth	-2.686	ADRA1B,APP,ZFP36L1,ELANE,FHL1,GATA6,HIF1A,IGFBP7,ATXN2,TKT,VCL,MAGI2,PLXNC1,FLRT1,LATS2,CRIM1,NOP58,NDRG3,HEG1,TBL1XR1,TTL,C3orf58
developmental growth	-2.15	ADRA1B,APP,ZFP36L1,GATA6,ATXN2,VCL,MAGI2,PLXNC1,FLRT1,LATS2,HEG1,TBL1XR1,TTL,C3orf58
neuron projection morphogenesis	-3.235	ANK2,APP,CACNB3,AP2M1,EFNA3,CELSR2,HPRT1,IRS1,MYH10,MAP2K1,PSMC2,RAC1,ATXN2,TIAM1,VCL,XK,PLPPR4,PLXNC1,ARPC1A,CIT,FLRT1,TTL
ephrin receptor signaling pathway	-3.1	AP2M1,EFNA3,MYH10,RAC1,TIAM1,ARPC1A
cell morphogenesis involved in neuron differentiation	-2.684	ANK2,APP,CACNB3,AP2M1,EFNA3,CELSR2,HPRT1,IRS1,MYH10,MAP2K1,PSMC2,RAC1,TIAM1,VCL,XK,PLPPR4,PLXNC1,ARPC1A,CIT,TTL
axonogenesis	-2.109	ANK2,APP,CACNB3,AP2M1,EFNA3,IRS1,MYH10,MAP2K1,PSMC2,RAC1,TIAM1,VCL,XK,PLPPR4,PLXNC1,ARPC1A,TTL
Supplementary Table S8F:Statistically significant biological process enriched in SCLC module 4
Biological process	Log p-value	Genes involved in biological process
regulation of Notch signaling pathway	-3.749	ASCL1,POSTN,CHAC1
Notch signaling pathway	-2.351	ASCL1,POSTN,CHAC1
response to endoplasmic reticulum stress	-2.098	CHAC1,DERL1,FAM129A
protein homooligomerization	-3.089	AKR1C1,SHMT2,DERL1,KCTD12
vitamin metabolic process	-2.805	SHMT2,SLC19A2,UBIAD1
protein oligomerization	-2.238	AKR1C1,SHMT2,DERL1,KCTD12
positive regulation of translation	-2.132	FAM129A,UHMK1,SHMT2
central nervous system neuron differentiation	-2.567	ASCL1,ATF5,MDGA2
cell differentiation in spinal cord	-2.453	ASCL1,MDGA2
forebrain neuron differentiation	-2.378	ASCL1,ATF5
forebrain generation of neurons	-2.27	ASCL1,ATF5
central nervous system neuron development	-2.21	ASCL1,ATF5
response to vitamin	-2.08	ASCL1,FKBP1B
ventral spinal cord development	-2.629	ASCL1,MDGA2
