# Supplementary material for: System analysis identifies distinct and common functional networks governed by transcription factor ASCL1, in glioma and small cell lung cancer
Source: Royal Society of Chemistry journal article supplement (doi:10.1039/c6mb00851h), 2017-05-18
Supplement: c6mb00851h1.zip [file c6mb00851h1.zip › Supplementary_Table_S9.xlsx]

## Sheet: TableS9A and B
Supplementary Table S9A: Distinct ASCL1 regulated glioma and SCLC coexpression networks
Biological process (Glioma)	GO log10pvalue (Glioma)	Genes in glioma	Biological process (SCLC)	GO log10pvalue (SCLC)	Genes in SCLC	GO similarity score
Tubulin binding	-5.06	FGF13,GLI1,GOLGA2,KIF5C,KIF11,MAP2,PDE4B,PRC1,CEP57,KIF14,KIF20A,MTUS2,MACF1,NUSAP1,CENPJ,REEP1,KIF18A,GAS2L3	Glutamine catabolic process	-4.332	GLS,PPAT,ASS1,PON3,PGM2L1,GCH1	0
Regulation of hemopoiesis	-2.378	CSF3,IL1B,LEP,LIF,ADIPOQ,FLCN,ATXN1L	PERK-mediated unfolded protein response	-2.594	ATF3,DDIT3	0
Negative regulation of ERK1 and ERK2 cascade	-2.404	LIF,ADIPOQ,FLCN	Positive regulation of stem cell differentiation	-3.057	LTBP3,TEAD3,TGFB1,TGFB1I1,DAG1,CITED1,IRX3,FUT8,NEDD8,ANKRD27,SDC1,FZD5,ARL3,STOX1,BLVRB,GNG12,PALM3,SEPN1,KL,CTBP2,NKX2-2	0
Supplementary Table S9B: Common ASCL1 regulated glioma and SCLC coexpression networks
Biological process(Glioma)	GO log10pvalue (Glioma)	Genes in glioma	Biological process (SCLC)	GO log10pvalue (SCLC)	Genes in SCLC	GO similarity score
Mitotic nuclear division	-4.294	BUB1,CDC25C,EGF,GOLGA2,KIF11,NEK2,PDGFRB,RAD21,TTK,SMC3,CEP57,DLGAP5,KIF14,STAG2,POGZ,RGCC,NUSAP1,MIS18BP1,CASC5,KIF18A,KNSTRN,ASPM	Mitotic nuclear division	-2.867	CCNG1,GEM,HOXA13,MAP2K1,DYNLT3,CCNA1,ARHGEF10,CIT,OIP5,LATS2,LRRCC1,REEP3,CENPW,DNM1L,FOXN3,FHL1,MYH10,PBX1,PSMC2,NAP1L2,CABLES2	1
Mitotic sister chromatid segregation	-4.596	BUB1,NEK2,TTK,SMC3,CEP57,DLGAP5,KIF14,POGZ,NUSAP1,KIF18A,KNSTRN	Mitotic metaphase plate congression	-2.046	CHMP2B,CHMP4C	0.789
Regulation of JAK-STAT cascade	-2.286	LEP,LIF,IL24,DOT1L	Notch signaling pathway	-3.749	ASCL1,POSTN,CHAC1	0.737
Response to cytokine	-3.17	CCNE1,CEBPA,CSF3,HAS2,IL1B,LEP,CCL20,SPHK1,ADIPOQ,TNFSF15,IL24,IL36RN,CD274,IRG1	Response to growth factor	-2.646	CD19,AP2M1,GATA6,HIF1A,HOXA13,IRS1,MOV10,MAP2K1,PSMC2,RAC1,TGIF1,TIAM1,MKNK1,MAGI2,TOB1,PEG10,TNRC6B,FLRT1,HIPK2,ARHGEF3,BCL9L	0.703
Organ morphogenesis	-9.249	SHROOM2,BMP6,BMPR1B,CNGA3,COL1A2,COL2A1,COL11A1,CTNNA2,EYA1,FBN2,EFEMP1,FGF7,FOXF1,GLI1,GLI3,HOXD10,HSPG2,ID3,SMAD7,MEF2C,MGP,MKI67,NFIB,NFIC,TNFRSF11B,PDGFRB,PTN,TCF21,TFAP2A,TGFBR3,TRPS1,VDR,MAGI2,TSHZ1,IRX5,SYCP2,SEMA3C,PLXND1,FLRT2,ANKRD11,SIX4,TMEM100,LGR4,CHRNA9,CSGALNACT1,CYP26B1,HEG1,NTN4,FAT4,COL12A1,WASF2,LRRC17,BBX,ADAR,ANGPT1,COL4A2,ITGAV,LMO2,SMAD6,NEK2,TOP2A,KLF4,NCOA6,PLCB1,MACF1,E…	Ventral spinal cord development	-2.629	ASCL1,MDGA2,ATF5,FKBP1B,SERPINI1,MACROD2,PROM1,RHOB,UNC5B,SHMT2,AKR1C1,AKNA	0.667
Regulation of cell motility	-2.488	HAS2,IL1B,CCL20,PHLDA2,SPHK1,ADIPOQ,IL24,CD274,SMURF2,PARD6B,FLCN	Regulation of actin filament-based movement	-2.046	CAMK2D,GJA1,SRI	0.639
Regulation of cell division	-4.245	BUB1,CDC25C,EGF,FGF7,KIF11,NEK2,PDGFRB,PTN,THBS4,TTK,DLGAP5,KIF14,TXNIP,PLCB1,RGCC,NUSAP1,CCNY,ASPM	Regulation of cell projection organization	-2.217	PTPRF,SNAP25,ARPC2,RHOQ,ASAP1,SYT17,RAB8B,METRN,ANKRD27,LINGO1,AGRN	0.604
Regulation of endocrine process	-2.713	IL1B,LEP,LIF	Regulation of muscle adaptation	-2.721	CAMK2D,PDE9A,TNNT1,SEPN1	0.584
Cellular response to biotic stimulus	-2.4	CSF3,IL1B,CCL20,IL24,IRG1	Response to ER stress	-2.48	ATF3,CEBPB,DDIT3,WIPI1,TRIB3	0.524
