# Supplementary material for: System analysis identifies distinct and common functional networks governed by transcription factor ASCL1, in glioma and small cell lung cancer
Source: Royal Society of Chemistry journal article supplement (doi:10.1039/c6mb00851h), 2017-05-18
Supplement: c6mb00851h1.zip [file c6mb00851h1.zip › Supplementary_Table_S10.xlsx]

## Sheet: Top 5% hubs protein TableS10A
Supplementary Table S10A: Top 5% hubs in glioma ASCL1 regulated down regulated protein-protein interaction network (n=133) (Note: N-R: Not regulated by ASCL1)
Proteins	Node degree	Top hubs regulated upon ASCL1 silencing (Fold Change (Log2))	Top hubs detected only in protein-protein interaction network (PPIN)
GOLGA2	313	-1.29286
ATXN1	301	-1.1735
EGFR	224	N-R	Detected in PPIN
MTUS2	181	-1.40297
CEP70	154	-1.62681
PTN	111	-1.20841
LMO2	108	-1.23196
BMPR1B	98	-1.43462
SSX2IP	95	-1.01274
CEP57L1	89	N-R	Detected in PPIN
CCDC102B	61	-2.82937
TCF12	55	-1.05738
JAK2	52	-2.01548
STUB1	48	N-R	Detected in PPIN
OPTN	47	N-R	Detected in PPIN
APPL1	38	N-R	Detected in PPIN
STK3	37	-1.2379
VDR	34	-1.06469
SMAD7	33	-1.26593
ANKRD28	32	-1.22308
PRSS23	32	-1.38316
PICK1	30	N-R	Detected in PPIN
NCOA6	30	-1.25099
TUBA8	29	N-R	Detected in PPIN
TUBGCP4	29	N-R	Detected in PPIN
GBP2	28	-1.40735
MEGF10	27	N-R	Detected in PPIN
MACF1	26	-1.67286
TUBB2A	26	N-R	Detected in PPIN
OTUB1	26	N-R	Detected in PPIN
ZNF451	24	-1.27131
TUBB3	24	N-R	Detected in PPIN
LEPR	24	-2.2963
SMCP	23	-1.22976
PLD1	23	-1.42428
PDGFRB	23	-1.5476
OTUB2	23	N-R	Detected in PPIN
TUBA1A	22	N-R	Detected in PPIN
FXR1	21	-1.03376
TAB2	21	-1.3481
NEK2	21	-2.43601
PRDM14	21	N-R	Detected in PPIN
FAM13C	20	-1.59494
ID3	19	-1.75293
CDC25C	19	-1.23208
POGZ	18	-1.23804
PPL	18	-1.26817
Q86SX1	17	N-R	Detected in PPIN
MAP2K3	17	N-R	Detected in PPIN
SREBF1	17	N-R	Detected in PPIN
NFE2	17	-1.52839
MAP2K1	16	N-R	Detected in PPIN
SOS1	16	-1.07558
PSMC3	16	N-R	Detected in PPIN
GRB2	15	N-R	Detected in PPIN
TUBB4A	15	N-R	Detected in PPIN
ESR2	14	N-R	Detected in PPIN
MAP2K5	14	N-R	Detected in PPIN
DACH1	14	-1.07502
USP20	14	-1.25117
CEP57	14	-1.58934
BUB1B	14	N-R	Detected in PPIN
TUBA4A	14	N-R	Detected in PPIN
EFEMP1	14	-2.15868
TDO2	14	-1.73286
FGF12	13	-1.28102
NFE2L2	13	N-R	Detected in PPIN
CASC5	13	-1.57598
NEDD4	12	N-R	Detected in PPIN
AHR	12	-1.04103
GPANK1	12	N-R	Detected in PPIN
MAP2K4	12	N-R	Detected in PPIN
ASS1	12	-1.07713
PRKG1	12	-1.25457
KDM1A	11	N-R	Detected in PPIN
MXI1	11	-1.03245
NOTCH3	11	-1.03487
TCF21	11	-1.23017
SMAD6	11	-1.05126
SATB1	11	-1.08872
SETBP1	11	-1.09432
IL15RA	11	N-R	Detected in PPIN
ASAP1	11	-1.14826
RAD21	11	-1.7782
MEF2C	11	-1.29782
MYOT	11	-1.56918
TUBB4B	11	N-R	Detected in PPIN
ZDHHC17	10	N-R	Detected in PPIN
MAP2K2	10	N-R	Detected in PPIN
DAZAP2	10	N-R	Detected in PPIN
SRC	10	N-R	Detected in PPIN
UBE2I	10	N-R	Detected in PPIN
UBASH3B	10	-1.15726
RHOBTB1	10	-1.17719
VEGFA	10	N-R	Detected in PPIN
DLGAP5	10	-1.26368
SMC3	10	-1.53206
BUB1	10	-1.56229
CREBBP	9	N-R	Detected in PPIN
ENAH	9	-1.00538
YWHAZ	9	N-R	Detected in PPIN
PYGL	9	-1.02191
NOTCH2NL	9	N-R	Detected in PPIN
NCK1	9	N-R	Detected in PPIN
HSPG2	9	-1.0349
PIK3R1	9	N-R	Detected in PPIN
ALDH3B1	9	-1.25472
APPL2	9	N-R	Detected in PPIN
SDC2	9	-1.3043
NFE2L1	9	N-R	Detected in PPIN
PTPN14	9	-1.41059
PPARGC1A	9	-1.57719
TUBB2B	9	N-R	Detected in PPIN
TOP2A	9	-2.05175
PDCD4	9	-1.68749
PSMA1	8	N-R	Detected in PPIN
KRT40	8	N-R	Detected in PPIN
KRT31	8	N-R	Detected in PPIN
ABL1	8	N-R	Detected in PPIN
NFIC	8	-1.02683
GFI1B	8	N-R	Detected in PPIN
ATN1	8	N-R	Detected in PPIN
STK31	8	-1.03555
MAP2K6	8	N-R	Detected in PPIN
LPPR4	8	-1.24702
MAP2K7	8	N-R	Detected in PPIN
AKT1	8	N-R	Detected in PPIN
IL15	8	-1.15824
ANXA7	8	N-R	Detected in PPIN
CPNE2	8	-1.14464
SCAF11	8	-1.43705
MATN2	8	-1.49173
TRAF2	8	N-R	Detected in PPIN

## Sheet: Top 5% hubs protein TableS10B
Supplementary Table S10B: Top 5% hubs in glioma ASCL1 regulated up regulated protein-protein interaction network (n=30) (Note: N-R: Not regulated by ASCL1)
Proteins	Node degree	Top hubs regulated upon ASCL1 silencing (Fold Change (Log2))	Top hubs detected only in protein-protein interaction network (PPIN)
ATXN1L	125	1.1631
SMURF2	76	1.11803
TTR	47	1.99694
SF3B4	45	1.40905	Detected in PPIN
SMARCE1	42	N-R
CDC25A	39	1.28358
ZGPAT	39	1.18133	Detected in PPIN
PSME1	23	N-R	Detected in PPIN
NME1	19	N-R
CEBPA	16	1.15455
PARD6B	12	1.47873
CCNE1	12	1.146
SH2D2A	10	1.1906
FOSB	9	1.22385
CYB5R2	9	1.06554
FBXO28	9	1.01233
IL36RN	8	1.49024
OAZ3	8	1.35016
IL1B	8	1.34768
DPYSL4	8	1.24987
SPSB1	8	1.17022
KRTAP2-3	7	1.55181
MAFF	6	1.46874
CHMP6	6	1.43425	Detected in PPIN
LEPROTL1	6	N-R
MXD1	6	1.22508
EHD1	6	1.09675
WIBG	6	1.02434	Detected in PPIN
LIFR	5	N-R
PYCRL	5	1.45841
