# Supplementary material for: System analysis identifies distinct and common functional networks governed by transcription factor ASCL1, in glioma and small cell lung cancer
Source: Royal Society of Chemistry journal article supplement (doi:10.1039/c6mb00851h), 2017-05-18
Supplement: c6mb00851h1.zip [file c6mb00851h1.zip › Supplementary_Table_S11.xlsx]

## Sheet: Top5% hubs in SCLC TableS11A
Supplementary Table S11A: Top 5% hubs in SCLC ASCL1 regulated down regulated protein-protein interaction network (n=135) (Note: N-R: Not regulated by ASCL1)
Proteins	Node degree	Top hubs regulated upon ASCL1 silencing (Fold Change (Log2))	Top hubs detected only in protein-protein interaction network (PPIN)
TERF1	233	N-R	Detected in PPIN
TERF2IP	150	N-R	Detected in PPIN
SETDB1	117	N-R	Detected in PPIN
KANK2	100	-1.56489
APPBP2	90	N-R	Detected in PPIN
RAC1	81	-1.07297
ZNF329	78	-1.54699
TRIM41	70	-1.32841
TNNT1	68	-1.07179
SETD7	60	-1.15853
APP	58	-1.63663
TERF2	58	N-R	Detected in PPIN
CTBP2	58	-1.66607
ZNF250	54	N-R	Detected in PPIN
CRKL	50	N-R	Detected in PPIN
TGFB1I1	49	-1.30107
ACTN1	49	-1.16337
MAP1LC3B	48	-1.37769
GEM	48	-1.27344
APLP1	48	-1.01677
KLHL12	42	N-R	Detected in PPIN
GABARAPL2	42	N-R	Detected in PPIN
ILF3	40	-1.0193
PPP1R18	38	-1.15507
APPL1	36	N-R	Detected in PPIN
GOLM1	36	-1.7109
MID1	36	-1.09993
CAMK2D	35	-1.09771
G2XKQ0	35	N-R	Detected in PPIN
KLC3	34	N-R	Detected in PPIN
TXLNB	33	-1.54716
SMARCD1	31	-1.30212
AP2M1	31	-2.03982
IRS1	29	-1.47323
MYD88	29	-1.17513
MKNK1	28	-1.0307
LSM1	27	-1.28904
PSME1	27	-1.10613
PNMA2	26	-1.44827
SET	26	-1.08093
KLHL38	24	N-R	Detected in PPIN
BNIP3L	24	-2.55179	Detected in PPIN
ATXN2	24	-1.06504	Detected in PPIN
DDAH2	24	-1.16995	Detected in PPIN
VCL	23	-1.50649	Detected in PPIN
FHL1	22	-1.06508
DNM1	22	N-R	Detected in PPIN
GRB2	22	N-R	Detected in PPIN
PTBP2	21	-1.28491
Q86SX1	21	N-R	Detected in PPIN
KRT40	21	N-R	Detected in PPIN
PDE9A	21	-1.07131
E9KL35	20	N-R	Detected in PPIN
DTX3L	20	-1.2802
KRTAP10-7	20	N-R	Detected in PPIN
SYT17	20	-1.1042
PBXIP1	20	-1.08184
DNM1L	20	-1.43416
FXYD6	19	-1.60263
LGALS14	19	N-R	Detected in PPIN
CCNG1	19	-1.30723
CEP70	19	N-R	Detected in PPIN
GABARAPL1	18	N-R	Detected in PPIN
KLC4	18	N-R	Detected in PPIN
OIP5	18	-1.25436
ZNF32	18	-1.12513
MAP2K1	18	-1.02815
ZNF830	18	N-R	Detected in PPIN
PHF10	18	N-R	Detected in PPIN
TGFB1	17	-1.6994
HIF1A	17	-1.43876
SNAP25	17	-1.36714
RNF130	17	-1.2616
MRPL11	17	-1.10101
KIF1BP	17	N-R	Detected in PPIN
CPNE4	17	-1.38394
RRAS2	16	N-R	Detected in PPIN
RSPH14	16	N-R	Detected in PPIN
SERF2	16	N-R	Detected in PPIN
CCNA1	16	-1.19895
PFKL	16	N-R	Detected in PPIN
ATXN1	16	N-R	Detected in PPIN
HIPK2	16	-1.49012
MEOX2	16	N-R	Detected in PPIN
MAP3K3	15	-2.19194
PPIL1	15	-1.73403
SEPHS1	15	-1.61955
CDKL3	15	N-R	Detected in PPIN
KATNAL1	15	-1.30342
GEMIN7	15	N-R	Detected in PPIN
MED21	15	-1.23576
PHF1	15	N-R	Detected in PPIN
METTL17	15	N-R	Detected in PPIN
SMAD3	15	N-R	Detected in PPIN
HIP1	14	-1.61599
PTPRF	14	-1.69675
KLHL2	14	N-R	Detected in PPIN
KLF3	14	N-R	Detected in PPIN
KLF10	14	N-R	Detected in PPIN
SIRPA	14	-1.77574
SATB1	14	-1.15026
KDM1A	14	N-R	Detected in PPIN
SETBP1	14	N-R	Detected in PPIN
KRTAP10-3	14	N-R	Detected in PPIN
PDLIM3	14	-1.23814
TRIM27	14	N-R	Detected in PPIN
TGIF1	14	-1.01656
PEG10	13	-1.65387
RRAS	13	-1.47773
KLHL42	13	N-R	Detected in PPIN
CRIP2	13	-1.59032
CLNS1A	13	-1.32575
DTX1	13	-1.21819
CALCOCO2	13	N-R	Detected in PPIN
TTLL10	13	N-R	Detected in PPIN
UBQLN4	13	N-R	Detected in PPIN
Q9P0T0	13	N-R	Detected in PPIN
LTBP3	13	-1.19449
NEDD8	13	-1.05891
ABL1	13	N-R	Detected in PPIN
TRAPPC2	12	N-R	Detected in PPIN
TRAPPC6A	12	N-R	Detected in PPIN
KLHL20	12	N-R	Detected in PPIN
CITED1	12	-1.34974
SRI	12	-1.1931
KRTAP10-5	12	N-R	Detected in PPIN
ADRA1B	12	-1.10066
IGBP1	12	N-R	Detected in PPIN
CELSR2	12	-1.05481
CRK	12	N-R	Detected in PPIN
SRC	12	N-R	Detected in PPIN
MXI1	11	-1.40688
KLHL5	11	N-R	Detected in PPIN
KLF11	11	N-R	Detected in PPIN
SH3BP5	11	-1.26744

## Sheet: Top5% hubs in SCLC TableS10B
Supplementary Table S11B: Top 5% hubs in SCLC ASCL1 regulated up regulated protein-protein interaction network (n=66) (Note: N-R: Not regulated by ASCL1)
Proteins	Node degree	Top hubs regulated upon ASCL1 silencing (Fold Change (Log2))	Top hubs detected only in protein-protein interaction network (PPIN)
BATF3	127	N-R	Detected in PPIN
ATF3	93	1.10351
IKZF3	76	N-R	Detected in PPIN
NIF3L1	75	N-R	Detected in PPIN
DDIT3	72	1.18306
HOXA1	65	1.14899
PRKAB2	59	1.00611
PRPF31	55	N-R	Detected in PPIN
RNF32	47	N-R	Detected in PPIN
SF3B4	47	N-R	Detected in PPIN
C8ORF33	42	N-R	Detected in PPIN
CEBPB	32	1.5787
EIF3I	32	N-R	Detected in PPIN
DUSP23	30	1.30237
TRAF3IP1	29	N-R	Detected in PPIN
RPGRIP1	28	N-R	Detected in PPIN
SF3B2	27	N-R	Detected in PPIN
MYOG	26	N-R	Detected in PPIN
BEX2	26	1.20665
ATF5	25	1.62021
PRPF3	25	N-R	Detected in PPIN
TCF3	24	N-R	Detected in PPIN
GTF3C1	24	N-R	Detected in PPIN
SF3B3	22	N-R	Detected in PPIN
RNF31	22	N-R	Detected in PPIN
PRPF38A	21	N-R	Detected in PPIN
TRAF3	20	N-R	Detected in PPIN
MPP1	20	1.42291
TRIB3	19	N-R	Detected in PPIN
PGLS	18	N-R	Detected in PPIN
H3F3A	15	N-R	Detected in PPIN
IRF3	15	N-R	Detected in PPIN
EIF3G	15	N-R	Detected in PPIN
FKBP1B	15	N-R	Detected in PPIN
ABCF3	14	N-R	Detected in PPIN
KLF3	14	N-R	Detected in PPIN
GRB2	13	N-R	Detected in PPIN
RGS16	13	N-R	Detected in PPIN
H3F3C	13	N-R	Detected in PPIN
ZNF337	13	N-R	Detected in PPIN
MAL2	12	N-R	Detected in PPIN
KRT40	12	N-R	Detected in PPIN
Q53F30	12	N-R	Detected in PPIN
SF3B1	12	N-R	Detected in PPIN
EIF3E	12	N-R	Detected in PPIN
TRAF3IP3	12	N-R	Detected in PPIN
ATF4	11	N-R	Detected in PPIN
EIF3C	11	N-R	Detected in PPIN
ATF2	11	N-R	Detected in PPIN
CEBPG	11	N-R	Detected in PPIN
CEP70	11	N-R	Detected in PPIN
MDFI	11	N-R	Detected in PPIN
EIF3J	11	N-R	Detected in PPIN
SF3A1	11	N-R	Detected in PPIN
ASS1	11	1.15821
OSTF1	10	N-R	Detected in PPIN
CREB5	10	N-R	Detected in PPIN
KRTAP10-5	10	N-R	Detected in PPIN
KRTAP10-7	10	N-R	Detected in PPIN
ZDHHC17	10	N-R	Detected in PPIN
ZNF398	10	N-R	Detected in PPIN
MTERF3	10	N-R	Detected in PPIN
JUN	9	N-R	Detected in PPIN
KRTAP10-3	9	N-R	Detected in PPIN
RBPMS	9	N-R	Detected in PPIN
CELF3	9	N-R	Detected in PPIN
