# Supplementary material for: System analysis identifies distinct and common functional networks governed by transcription factor ASCL1, in glioma and small cell lung cancer
Source: Royal Society of Chemistry journal article supplement (doi:10.1039/c6mb00851h), 2017-05-18
Supplement: c6mb00851h1.zip [file c6mb00851h1.zip › Supplementary_Table_S12.xlsx]

## Sheet: TableS12A_B
Supplementary Table S12A:Statistically significant biological process enriched in Up regulated PPIN in glioma
Biological process	Log p-value	Proteins involved in biological process
response to glucocorticoid	-4.10409	CCNE1,CEBPA,FOSB,IL1B
response to cytokine	-3.70055	CCNE1,CEBPA,IL1B,LEPR,LIFR,PSME1,IL36RN
cytokine-mediated signaling pathway	-3.63746	CEBPA,IL1B,LEPR,LIFR,PSME1,IL36RN
regulation of protein kinase activity	-2.81491	CCNE1,CDC25A,CEBPA,IL1B,PSME1,ZGPAT
lipid storage	-2.42843	IL1B,EHD1
Supplementary Table S12B: Statistically significant biological process enriched in Down regulated PPIN in glioma
Biological process	Log p-value	Proteins involved in biological process
mitotic cell cycle process	-15.0175	ABL1,AKT1,BUB1,BUB1B,CDC25C,CREBBP,EGFR,GOLGA2,HSP90AA1,NEK2,PDGFRB,MAP2K1,PSMA1,PSMC3,RAD21,TOP2A,TUBA4A,UBE2I,TUBA1A,SMC3,CEP57,DLGAP5,OPTN,TUBB3,TUBB4A,TUBB4B,POGZ,TUBGCP4,CASC5,CEP70,CEP57L1
mitotic cell cycle phase transition	-10.0271	AKT1,BUB1,BUB1B,CDC25C,CREBBP,EGFR,HSP90AA1,NEK2,PSMA1,PSMC3,TUBA4A,TUBA1A,CEP57,DLGAP5,OPTN,TUBB4A,TUBB4B,TUBGCP4,CEP70
cell cycle phase transition	-9.65696	AKT1,BUB1,BUB1B,CDC25C,CREBBP,EGFR,HSP90AA1,NEK2,PSMA1,PSMC3,TUBA4A,TUBA1A,CEP57,DLGAP5,OPTN,TUBB4A,TUBB4B,TUBGCP4,CEP70
G2/M transition of mitotic cell cycle	-7.6153	CDC25C,HSP90AA1,NEK2,TUBA4A,TUBA1A,CEP57,OPTN,TUBB4A,TUBB4B,TUBGCP4,CEP70
cell cycle G2/M phase transition	-7.51945	CDC25C,HSP90AA1,NEK2,TUBA4A,TUBA1A,CEP57,OPTN,TUBB4A,TUBB4B,TUBGCP4,CEP70
immune response-regulating cell surface receptor signaling pathway	-10.8674	ABL1,AKT1,CREBBP,EGFR,GRB2,HSP90AA1,JAK2,MEF2C,NCK1,PDGFRB,PIK3R1,MAP2K1,MAP2K2,MAP2K7,PSMA1,PSMC3,MAP2K4,SOS1,SRC,TAB2,ENAH
protein tyrosine kinase signaling pathway	-10.7169	ABL1,AKT1,EGFR,EFEMP1,FGF12,GRB2,HSP90AA1,JAK2,MEF2C,NCK1,NEDD4,PDGFRB,PIK3R1,MAP2K1,MAP2K2,MAP2K5,PSMA1,PSMC3,ATXN1,SDC2,SOS1,SRC,SREBF1,VEGFA,CEP57,APPL1,PRDM14
immune response-regulating signaling pathway	-10.6488	ABL1,AKT1,CREBBP,EGFR,GRB2,HSP90AA1,JAK2,MEF2C,NCK1,PDGFRB,PIK3R1,MAP2K1,MAP2K2,MAP2K3,MAP2K6,MAP2K7,PSMA1,PSMC3,MAP2K4,SOS1,SRC,TAB2,ENAH
Fc receptor signaling pathway	-10.45	ABL1,AKT1,EGFR,GRB2,HSP90AA1,JAK2,NCK1,PDGFRB,PIK3R1,MAP2K1,MAP2K2,MAP2K7,PSMA1,PSMC3,MAP2K4,SOS1,SRC,TAB2
vascular endothelial growth factor receptor signaling pathway	-10.255	AKT1,EGFR,GRB2,HSP90AA1,JAK2,NCK1,NEDD4,PDGFRB,PIK3R1,MAP2K1,MAP2K2,PSMA1,PSMC3,SOS1,SRC,VEGFA
cellular response to growth factor stimulus	-8.96502	AKT1,BMPR1B,EGFR,FGF12,GRB2,JAK2,SMAD6,SMAD7,MEF2C,NEDD4,PDGFRB,PIK3R1,MAP2K1,MAP2K2,MAP2K5,PSMA1,PSMC3,PTN,SOS1,SRC,VEGFA,CEP57,STUB1,PRDM14
fibroblast growth factor receptor signaling pathway	-8.87803	AKT1,EGFR,FGF12,GRB2,JAK2,PDGFRB,PIK3R1,MAP2K1,MAP2K2,PSMA1,PSMC3,SOS1,SRC,CEP57,PRDM14
cell morphogenesis involved in neuron differentiation	-8.67878	ABL1,BMPR1B,EGFR,GRB2,HSP90AA1,JAK2,MATN2,MEF2C,NCK1,NEDD4,PDGFRB,MAP2K1,MAP2K2,PSMA1,PSMC3,SDC2,SOS1,SRC,VEGFA,PLPPR4,TUBB3,MACF1,ENAH
cellular response to fibroblast growth factor stimulus	-8.5138	AKT1,EGFR,FGF12,GRB2,JAK2,PDGFRB,PIK3R1,MAP2K1,MAP2K2,PSMA1,PSMC3,SOS1,SRC,CEP57,PRDM14
neuron projection guidance	-8.50075	ABL1,BMPR1B,EGFR,GRB2,HSP90AA1,JAK2,MATN2,NCK1,PDGFRB,MAP2K1,MAP2K2,PSMA1,PSMC3,SDC2,SOS1,SRC,VEGFA,TUBB3,ENAH
axon development	-8.47629	ABL1,BMPR1B,EGFR,GRB2,HSP90AA1,JAK2,MATN2,NCK1,PDGFRB,MAP2K1,MAP2K2,PSMA1,PSMC3,SDC2,SOS1,SRC,VEGFA,STK24,PLPPR4,TUBB3,MACF1,ENAH
axonogenesis	-8.03488	ABL1,BMPR1B,EGFR,GRB2,HSP90AA1,JAK2,MATN2,NCK1,PDGFRB,MAP2K1,MAP2K2,PSMA1,PSMC3,SDC2,SOS1,SRC,VEGFA,PLPPR4,TUBB3,MACF1,ENAH
Fc-epsilon receptor signaling pathway	-7.72924	AKT1,EGFR,GRB2,JAK2,PDGFRB,PIK3R1,MAP2K1,MAP2K2,MAP2K7,PSMA1,PSMC3,MAP2K4,SOS1,TAB2
neuron projection morphogenesis	-7.6769	ABL1,BMPR1B,EGFR,GRB2,HSP90AA1,JAK2,MATN2,NCK1,NEDD4,PDGFRB,MAP2K1,MAP2K2,PSMA1,PSMC3,SDC2,SOS1,SRC,VEGFA,PLPPR4,TUBB3,MACF1,ENAH
cellular response to hormone stimulus	-7.59642	AKT1,ASS1,EGFR,ESR2,GRB2,JAK2,LMO2,MEF2C,PDGFRB,PIK3R1,MAP2K1,MAP2K2,PSMA1,PSMC3,SOS1,SRC,SREBF1,VDR,PPARGC1A,APPL1
epidermal growth factor receptor signaling pathway	-7.16441	ABL1,AKT1,EGFR,EFEMP1,GRB2,JAK2,PDGFRB,PIK3R1,MAP2K1,MAP2K2,PSMA1,PSMC3,SOS1,SRC
cellular response to nitrogen compound	-7.16093	ABL1,AKT1,ASS1,EGFR,GRB2,JAK2,MEF2C,PDGFRB,PIK3R1,MAP2K1,MAP2K2,PSMA1,PSMC3,SOS1,SRC,SREBF1,TRAF2,PPARGC1A,APPL1
ERBB signaling pathway	-7.06221	ABL1,AKT1,EGFR,EFEMP1,GRB2,JAK2,PDGFRB,PIK3R1,MAP2K1,MAP2K2,PSMA1,PSMC3,SOS1,SRC
regulation of cellular component movement	-6.81136	ABL1,AKT1,DACH1,EGFR,FGF12,JAK2,SMAD7,PDGFRB,PIK3R1,PLD1,MAP2K1,MAP2K2,MAP2K5,SRC,VEGFA,STK24,PPARGC1A,MACF1,SSX2IP
regulation of cell motility	-6.79617	ABL1,AKT1,DACH1,EGFR,JAK2,SMAD7,PDGFRB,PIK3R1,PLD1,MAP2K1,MAP2K2,MAP2K5,SRC,VEGFA,STK24,PPARGC1A,MACF1,SSX2IP
insulin receptor signaling pathway	-6.70093	AKT1,EGFR,GRB2,JAK2,PDGFRB,PIK3R1,MAP2K1,MAP2K2,PSMA1,PSMC3,SOS1,SREBF1,APPL1
neurotrophin TRK receptor signaling pathway	-6.63564	AKT1,EGFR,GRB2,JAK2,MEF2C,PDGFRB,PIK3R1,MAP2K1,MAP2K2,MAP2K5,PSMA1,PSMC3,SOS1,SRC
neurotrophin signaling pathway	-6.59646	AKT1,EGFR,GRB2,JAK2,MEF2C,PDGFRB,PIK3R1,MAP2K1,MAP2K2,MAP2K5,PSMA1,PSMC3,SOS1,SRC
small GTPase mediated signal transduction	-6.58527	ABL1,BUB1,BUB1B,CDC25C,EGFR,GRB2,JAK2,NCK1,PDGFRB,PLD1,MAP2K1,MAP2K2,PSMA1,PSMC3,SOS1,SRC,YWHAZ,RHOBTB1,KDM1A,CASC5,SSX2IP
VEGFR signaling pathway	-10.255	AKT1,EGFR,GRB2,HSP90AA1,JAK2,NCK1,NEDD4,PDGFRB,PIK3R1,MAP2K1,MAP2K2,PSMA1,PSMC3,SOS1,SRC,VEGFA
regulation of cellular response to stress	-7.958	ABL1,AKT1,CREBBP,EGFR,HSP90AA1,NCK1,NFE2L2,PIK3R1,MAP2K1,MAP2K2,MAP2K7,MAP2K4,SREBF1,TRAF2,VEGFA,STK24,KDM1A,PDCD4,OTUB1

## Sheet: TableS12C-D
Supplementary Table S12C:Statistically significant biological process enriched in Up regulated PPIN in SCLC
Biological process	Log p-value	Proteins involved in biological process
regulation of transcription from RNA polymerase II promoter in response to stress	-7.40254	ARNT,ATF3,ATF4,CEBPB,DDIT3,JUN
mRNA splicing, via spliceosome	-6.63461	PRPF3,SF3B4,SF3A1,SF3B2,RBPMS,CELF3,SF3B3,SF3B1,PRPF31
regulation of cytokine production	-4.19841	ARNT,ATF4,CEBPB,CEBPG,ATF2,DDIT3,IRF3,TRAF3,TRAF3IP1
cytokine production	-3.89766	ARNT,ATF4,CEBPB,CEBPG,ATF2,DDIT3,IRF3,TRAF3,TRAF3IP1
Supplementary Table S12D:Statistically significant biological process enriched in Down regulated PPIN in glioma
Biological process	Log p-value	Proteins involved in biological process
cellular response to growth factor stimulus	-8.31275	CAMK2D,AP2M1,CRK,CRKL,GRB2,HIF1A,IRS1,SMAD3,CITED1,MYD88,NEDD8,MAP2K1,PSME1,RAC1,SRC,TGFB1,TGFB1I1,TGIF1,KLF10,MKNK1,GNB2L1,PEG10,HIPK2
response to growth factor	-8.11165	CAMK2D,AP2M1,CRK,CRKL,GRB2,HIF1A,IRS1,SMAD3,CITED1,MYD88,NEDD8,MAP2K1,PSME1,RAC1,SRC,TGFB1,TGFB1I1,TGIF1,KLF10,MKNK1,GNB2L1,PEG10,HIPK2
apoptotic signaling pathway	-5.04979	ABL1,BNIP3L,HIF1A,HIP1,IGBP1,SMAD3,RAC1,SRC,TGFB1,MKNK1,DNM1L,GNB2L1,KDM1A,APPL1,HIPK2
regulation of cellular component movement	-4.89376	ABL1,ACTN1,CAMK2D,HIF1A,IGBP1,IRS1,SMAD3,MAP2K1,RAC1,RRAS,SRC,SRI,TGFB1,VCL,GNB2L1,RRAS2
positive regulation of apoptotic process	-4.32434	ABL1,BNIP3L,CAMK2D,HIP1,SMAD3,RAC1,TERF1,TGFB1,KLF11,DNM1L,GNB2L1,PNMA2,LGALS14
positive regulation of programmed cell death	-4.28501	ABL1,BNIP3L,CAMK2D,HIP1,SMAD3,RAC1,TERF1,TGFB1,KLF11,DNM1L,GNB2L1,PNMA2,LGALS14
positive regulation of cell death	-4.06556	ABL1,BNIP3L,CAMK2D,HIP1,SMAD3,RAC1,TERF1,TGFB1,KLF11,DNM1L,GNB2L1,PNMA2,LGALS14
positive regulation of cell migration	-3.98696	CAMK2D,HIF1A,IRS1,SMAD3,MAP2K1,RAC1,SRC,TGFB1,GNB2L1,RRAS2
positive regulation of cell motility	-3.89176	CAMK2D,HIF1A,IRS1,SMAD3,MAP2K1,RAC1,SRC,TGFB1,GNB2L1,RRAS2
positive regulation of cellular component movement	-3.81785	CAMK2D,HIF1A,IRS1,SMAD3,MAP2K1,RAC1,SRC,TGFB1,GNB2L1,RRAS2
positive regulation of locomotion	-3.73698	CAMK2D,HIF1A,IRS1,SMAD3,MAP2K1,RAC1,SRC,TGFB1,GNB2L1,RRAS2
regulation of cell motility	-3.62176	ABL1,CAMK2D,HIF1A,IRS1,SMAD3,MAP2K1,RAC1,RRAS,SRC,TGFB1,VCL,GNB2L1,RRAS2
regulation of cell migration	-3.28729	CAMK2D,HIF1A,IRS1,SMAD3,MAP2K1,RAC1,RRAS,SRC,TGFB1,VCL,GNB2L1,RRAS2
regulation of locomotion	-3.26789	ABL1,CAMK2D,HIF1A,IRS1,SMAD3,MAP2K1,RAC1,RRAS,SRC,TGFB1,VCL,GNB2L1,RRAS2
regulation of anatomical structure morphogenesis	-3.24069	ABL1,HIF1A,SMAD3,CITED1,MAP2K1,RAC1,RRAS,SRC,TGFB1,TGFB1I1,TGIF1,DNM1L,GNB2L1,HIPK2,SYT17
cell growth	-3.05356	ABL1,ADRA1B,APP,CAMK2D,FHL1,SMAD3,TGFB1,VCL,GNB2L1,SYT17
regulation of cellular response to stress	-8.01248	ABL1,BNIP3L,CAMK2D,HIF1A,HSP90AA1,IGBP1,MAP3K3,MID1,MAP2K1,PTPRF,TERF2,DNM1L,CALCOCO2,GNB2L1,KDM1A,HIPK2,TERF2IP,UBQLN4,MAP1LC3B
regulation of response to extracellular stimulus	-5.09281	BNIP3L,HIF1A,DNM1L,CALCOCO2,KANK2,UBQLN4,MAP1LC3B
regulation of response to nutrient levels	-5.09281	BNIP3L,HIF1A,DNM1L,CALCOCO2,KANK2,UBQLN4,MAP1LC3B
regulation of macroautophagy	-4.60073	BNIP3L,HIF1A,DNM1L,CALCOCO2,UBQLN4,MAP1LC3B
regulation of cellular catabolic process	-4.02192	ABL1,ADRA1B,BNIP3L,HIF1A,IRS1,PSME1,TERF1,DNM1L,CALCOCO2,GNB2L1,GABARAPL2,UBQLN4,MAP1LC3B
autophagy	-4.01352	ABL1,BNIP3L,HIF1A,HSP90AA1,MAP2K1,DNM1L,CALCOCO2,GABARAPL2,GABARAPL1,UBQLN4,MAP1LC3B
regulation of autophagy	-3.94682	ABL1,BNIP3L,HIF1A,DNM1L,CALCOCO2,UBQLN4,MAP1LC3B
regulation of catabolic process	-3.90777	ABL1,ADRA1B,BNIP3L,HIF1A,IRS1,SMAD3,PSME1,TERF1,DNM1L,CALCOCO2,GNB2L1,GABARAPL2,UBQLN4,MAP1LC3B
regulation of mitophagy	-3.87781	BNIP3L,HIF1A,DNM1L,MAP1LC3B
macroautophagy	-3.79952	BNIP3L,HIF1A,MAP2K1,DNM1L,CALCOCO2,GABARAPL2,GABARAPL1,UBQLN4,MAP1LC3B
mitophagy	-3.42433	BNIP3L,HIF1A,MAP2K1,DNM1L,GABARAPL2,GABARAPL1,MAP1LC3B
mitochondrion disassembly	-3.42433	BNIP3L,HIF1A,MAP2K1,DNM1L,GABARAPL2,GABARAPL1,MAP1LC3B
response to nutrient levels	-3.26689	BNIP3L,HIF1A,TGFB1,KLF10,DNM1L,CALCOCO2,GABARAPL2,KANK2,UBQLN4,MAP1LC3B
organelle disassembly	-3.21422	BNIP3L,HIF1A,MAP2K1,DNM1L,GABARAPL2,GABARAPL1,MAP1LC3B
response to extracellular stimulus	-3.06038	BNIP3L,HIF1A,TGFB1,KLF10,DNM1L,CALCOCO2,GABARAPL2,KANK2,UBQLN4,MAP1LC3B
cellular component disassembly	-3.0557	BNIP3L,HIF1A,MID1,MAP2K1,SATB1,SET,SMARCD1,TGFB1,DNM1L,GABARAPL2,GABARAPL1,MRPL11,MAP1LC3B
protein tyrosine kinase signaling pathway	-5.92908	ABL1,APP,CAMK2D,AP2M1,CRK,CRKL,DNM1,GRB2,HIF1A,HSP90AA1,IRS1,MYD88,MAP2K1,PSME1,RAC1,ATXN1,SRC,TGFB1,MKNK1,APPL1
vascular endothelial growth factor receptor signaling pathway	-4.78235	CAMK2D,CRK,GRB2,HIF1A,HSP90AA1,IRS1,MAP2K1,PSME1,RAC1,SRC
transmembrane receptor protein tyrosine kinase signaling pathway	-5.92908	ABL1,APP,CAMK2D,AP2M1,CRK,CRKL,DNM1,GRB2,HIF1A,HSP90AA1,IRS1,MYD88,MAP2K1,PSME1,RAC1,ATXN1,SRC,TGFB1,MKNK1,APPL1
vascular endothelial growth factor receptor signaling pathway	-4.78235	CAMK2D,CRK,GRB2,HIF1A,HSP90AA1,IRS1,MAP2K1,PSME1,RAC1,SRC
neuron projection morphogenesis	-4.5732	ABL1,APP,CAMK2D,AP2M1,DNM1,CELSR2,GRB2,HSP90AA1,IRS1,MAP2K1,PSME1,RAC1,RRAS,ATXN2,SRC,VCL,SYT17
positive regulation of intracellular signal transduction	-4.48398	ADRA1B,CAMK2D,CRK,CRKL,GRB2,IRS1,MAP3K3,MID1,MYD88,MAP2K1,PSME1,RAC1,SRC,TGFB1,DNM1L,GNB2L1,HIPK2,TERF2IP
neurotrophin TRK receptor signaling pathway	-4.37359	CAMK2D,AP2M1,CRK,CRKL,GRB2,IRS1,MYD88,MAP2K1,PSME1,RAC1,SRC
neurotrophin signaling pathway	-4.34435	CAMK2D,AP2M1,CRK,CRKL,GRB2,IRS1,MYD88,MAP2K1,PSME1,RAC1,SRC
immune response-regulating cell surface receptor signaling pathway involved in phagocytosis	-4.32592	ABL1,CRK,GRB2,HSP90AA1,RAC1,SRC
Fc-gamma receptor signaling pathway	-4.234	ABL1,CRK,GRB2,HSP90AA1,RAC1,SRC
axon guidance	-4.22302	ABL1,APP,CAMK2D,AP2M1,DNM1,GRB2,HSP90AA1,IRS1,MAP2K1,PSME1,RAC1,RRAS,SRC
neuron projection guidance	-4.22302	ABL1,APP,CAMK2D,AP2M1,DNM1,GRB2,HSP90AA1,IRS1,MAP2K1,PSME1,RAC1,RRAS,SRC
regulation of protein kinase activity	-4.21681	ABL1,APP,CAMK2D,CCNG1,CRK,CRKL,GRB2,IRS1,MAP3K3,MAP2K1,PSME1,TRIM27,SRC,TGFB1,SH3BP5,GNB2L1
positive regulation of MAPK cascade	-4.05095	ADRA1B,CAMK2D,CRK,CRKL,GRB2,IRS1,MAP3K3,MID1,MAP2K1,PSME1,SRC,TGFB1,HIPK2
epidermal growth factor receptor signaling pathway	-4.03578	ABL1,APP,CAMK2D,AP2M1,GRB2,IRS1,MAP2K1,PSME1,SRC,TGFB1
regulation of MAPK cascade	-4.00467	ADRA1B,CAMK2D,CRK,CRKL,GRB2,IGBP1,IRS1,MAP3K3,MID1,MAP2K1,PSME1,RRAS,SRC,TGFB1,HIPK2
axon development	-3.9739	ABL1,APP,CAMK2D,AP2M1,DNM1,GRB2,HSP90AA1,IRS1,MAP2K1,PSME1,PTPRF,RAC1,RRAS,SRC,VCL
ERBB signaling pathway	-3.96766	ABL1,APP,CAMK2D,AP2M1,GRB2,IRS1,MAP2K1,PSME1,SRC,TGFB1
phagocytosis	-3.9613	ABL1,CRK,GRB2,HSP90AA1,RAC1,SRC,TGFB1,GNB2L1
positive regulation of protein phosphorylation	-3.95977	ABL1,ADRA1B,CAMK2D,CRK,CRKL,GRB2,IRS1,MAP3K3,MID1,MAP2K1,PSME1,RAC1,SRC,TGFB1,GNB2L1,HIPK2,TERF2IP
regulation of kinase activity	-3.95053	ABL1,APP,CAMK2D,CCNG1,CRK,CRKL,GRB2,IRS1,MAP3K3,MAP2K1,PSME1,TRIM27,SRC,TGFB1,SH3BP5,GNB2L1
activation of MAPKK activity	-3.9485	CAMK2D,CRK,CRKL,GRB2,IRS1,MAP3K3,MAP2K1,PSME1
regulation of transferase activity	-3.86404	ABL1,APP,CAMK2D,CCNG1,CRK,CRKL,GRB2,IRS1,MAP3K3,MAP2K1,PSME1,TRIM27,SRC,TERF1,TGFB1,SH3BP5,GNB2L1
cell morphogenesis involved in neuron differentiation	-3.66386	ABL1,APP,CAMK2D,AP2M1,DNM1,CELSR2,GRB2,HSP90AA1,IRS1,MAP2K1,PSME1,RAC1,RRAS,SRC,VCL
axonogenesis	-3.60029	ABL1,APP,CAMK2D,AP2M1,DNM1,GRB2,HSP90AA1,IRS1,MAP2K1,PSME1,RAC1,RRAS,SRC,VCL
MAPK cascade	-3.58657	ADRA1B,CAMK2D,CRK,CRKL,GRB2,IGBP1,IRS1,MAP3K3,MID1,MAP2K1,PSME1,RRAS,SRC,TGFB1,HIPK2
mitotic cell cycle process	-4.69534	ABL1,CAMK2D,CCNG1,FHL1,GEM,HSP90AA1,MAP2K1,PSME1,TERF1,TGFB1,KLF11,CCNA1,OIP5,KANK2,KLHL42,CEP70,ZNF830
Fc receptor signaling pathway	-3.827	ABL1,CAMK2D,CRK,GRB2,HSP90AA1,IRS1,MAP2K1,PSME1,RAC1,SRC
VEGFR signaling pathway	-4.782	CAMK2D,CRK,GRB2,HIF1A,HSP90AA1,IRS1,MAP2K1,PSME1,RAC1,SRC
