# Supplementary material for: System analysis identifies distinct and common functional networks governed by transcription factor ASCL1, in glioma and small cell lung cancer
Source: Royal Society of Chemistry journal article supplement (doi:10.1039/c6mb00851h), 2017-05-18
Supplement: c6mb00851h1.zip [file c6mb00851h1.zip › Supplementary_Table_S13.xlsx]

## Sheet: TableS13A and B
Supplementary Table S13A: Distinct ASCL1 down regulated hubs in glioma and SCLC protein networks
Biological process (Glioma)	GO log10pvalue (Glioma)	Proteins in glioma	Biological process (SCLC)	GO log10pvalue (SCLC)	Proteins in SCLC	GO similarity score
Small GTPase signal transduction	-6.585	ABL1,BUB1,BUB1B,CDC25C,EGFR,GRB2,JAK2,NCK1,PDGFRB,PLD1,MAP2K1,MAP2K2,PSMA1,PSMC3,SOS1,SRC,YWHAZ,RHOBTB1,KDM1A,CASC5,SSX2IP	Mitochondrion disassembly	-3.424	BNIP3L,HIF1A,MAP2K1,DNM1L,GABARAPL2,GABARAPL1,MAP1LC3B	0
Supplementary Table S13B: Common ASCL1 down regulated hubs in glioma and SCLC protein networks
Biological process (Glioma)	GO log10pvalue (Glioma)	Proteins in glioma	Biological process (SCLC)	GO log10pvalue (SCLC)	Proteins in SCLC	GO similarity score
Fc receptor signaling pathway	-10.45	ABL1,AKT1,EGFR,GRB2,HSP90AA1,JAK2,NCK1,PDGFRB,PIK3R1,MAP2K1,MAP2K2,MAP2K7,PSMA1,PSMC3,MAP2K4,SOS1,SRC,TAB2	Fc receptor signaling pathway	-3.827	ABL1,CAMK2D,CRK,GRB2,HSP90AA1,IRS1,MAP2K1,PSME1,RAC1,SRC	1
Neurotrophin TRK receptor signaling pathway	-6.636	AKT1,EGFR,GRB2,JAK2,MEF2C,PDGFRB,PIK3R1,MAP2K1,MAP2K2,MAP2K5,PSMA1,PSMC3,SOS1,SRC	Neurotrophin TRK receptor signaling pathway	-4.374	CAMK2D,AP2M1,CRK,CRKL,GRB2,IRS1,MYD88,MAP2K1,PSME1,RAC1,SRC	1
VEGFR signaling pathway	-10.255	AKT1,EGFR,GRB2,HSP90AA1,JAK2,NCK1,NEDD4,PDGFRB,PIK3R1,MAP2K1,MAP2K2,PSMA1,PSMC3,SOS1,SRC,VEGFA	VEGFR signaling pathway	-4.782	CAMK2D,CRK,GRB2,HIF1A,HSP90AA1,IRS1,MAP2K1,PSME1,RAC1,SRC	1
ERBB signaling pathway	-7.062	ABL1,AKT1,EGFR,EFEMP1,GRB2,JAK2,PDGFRB,PIK3R1,MAP2K1,MAP2K2,PSMA1,PSMC3,SOS1,SRC	ERBB signaling pathway	-3.968	ABL1,APP,CAMK2D,AP2M1,GRB2,IRS1,MAP2K1,PSME1,SRC,TGFB1	1
Protein tyrosine kinase signaling pathway	-10.717	ABL1,AKT1,EGFR,EFEMP1,FGF12,GRB2,HSP90AA1,JAK2,MEF2C,NCK1,NEDD4,PDGFRB,PIK3R1,MAP2K1,MAP2K2,MAP2K5,PSMA1,PSMC3,ATXN1,SDC2,SOS1,SRC,SREBF1,VEGFA,CEP57,APPL1,PRDM14	Protein tyrosine kinase signaling pathway	-5.929	ABL1,APP,CAMK2D,AP2M1,CRK,CRKL,DNM1,GRB2,HIF1A,HSP90AA1,IRS1,MYD88,MAP2K1,PSME1,RAC1,ATXN1,SRC,TGFB1,MKNK1,APPL1,CELSR2,RRAS,ATXN2,VCL,SYT17,ADRA1B,MAP3K3,MID1,DNM1L,GNB2L1,HIPK2,TERF2IP,CCNG1,TRIM27,SH3BP5,IGBP1,PTPRF,TERF1,SMAD3,RRAS2,APLP1,KLF10,KLF3,GEM,KDM1A,CITED1,BNIP3L,ILF3	1
Regulation of cellular response to stress	-7.958	ABL1,AKT1,CREBBP,EGFR,HSP90AA1,NCK1,NFE2L2,PIK3R1,MAP2K1,MAP2K2,MAP2K7,MAP2K4,SREBF1,TRAF2,VEGFA,STK24,KDM1A,PDCD4,OTUB1	Regulation of cellular response to stress	-8.012	ABL1,BNIP3L,CAMK2D,HIF1A,HSP90AA1,IGBP1,MAP3K3,MID1,MAP2K1,PTPRF,TERF2,DNM1L,CALCOCO2,GNB2L1,KDM1A,HIPK2,TERF2IP,UBQLN4,MAP1LC3B,KANK2,ADRA1B,IRS1,PSME1,TERF1,GABARAPL2,GABARAPL1,SMAD3,TGFB1,KLF10,SATB1,SET,SMARCD1,MRPL11	1
Regulation of cellular component movement	-6.811	ABL1,AKT1,DACH1,EGFR,FGF12,JAK2,SMAD7,PDGFRB,PIK3R1,PLD1,MAP2K1,MAP2K2,MAP2K5,SRC,VEGFA,STK24,PPARGC1A,MACF1,SSX2IP	Regulation of cellular component movement	-4.894	ABL1,ACTN1,CAMK2D,HIF1A,IGBP1,IRS1,SMAD3,MAP2K1,RAC1,RRAS,SRC,SRI,TGFB1,VCL,GNB2L1,RRAS2	1
Regulation of cell motility	-6.796	ABL1,AKT1,DACH1,EGFR,JAK2,SMAD7,PDGFRB,PIK3R1,PLD1,MAP2K1,MAP2K2,MAP2K5,SRC,VEGFA,STK24,PPARGC1A,MACF1,SSX2IP	Regulation of cell motility	-3.622	ABL1,CAMK2D,HIF1A,IRS1,SMAD3,MAP2K1,RAC1,RRAS,SRC,TGFB1,VCL,GNB2L1,RRAS2	1
Cellular response to growth factor stimulus	-8.965	AKT1,BMPR1B,EGFR,FGF12,GRB2,JAK2,SMAD6,SMAD7,MEF2C,NEDD4,PDGFRB,PIK3R1,MAP2K1,MAP2K2,MAP2K5,PSMA1,PSMC3,PTN,SOS1,SRC,VEGFA,CEP57,STUB1,PRDM14	Cellular response to growth factor stimulus	-8.313	CAMK2D,AP2M1,CRK,CRKL,GRB2,HIF1A,IRS1,SMAD3,CITED1,MYD88,NEDD8,MAP2K1,PSME1,RAC1,SRC,TGFB1,TGFB1I1,TGIF1,KLF10,MKNK1,GNB2L1,PEG10,HIPK2,ABL1,BNIP3L,HIP1,IGBP1,DNM1L,KDM1A,APPL1,ACTN1,RRAS,SRI,VCL,RRAS2,TERF1,KLF11,PNMA2,LGALS14,SYT17,ADRA1B,APP,ATXN2,SETDB1,ZNF830,FHL1,LTBP3,ATXN1,APLP1,KANK2,TRAPPC2	1
Axon development	-8.476	ABL1,BMPR1B,EGFR,GRB2,HSP90AA1,JAK2,MATN2,NCK1,PDGFRB,MAP2K1,MAP2K2,PSMA1,PSMC3,SDC2,SOS1,SRC,VEGFA,STK24,PLPPR4,TUBB3,MACF1,ENAH	Axon development	-3.974	ABL1,APP,CAMK2D,AP2M1,DNM1,GRB2,HSP90AA1,IRS1,MAP2K1,PSME1,PTPRF,RAC1,RRAS,SRC,VCL	1
Mitotic cell cycle process	-15.018	ABL1,AKT1,BUB1,BUB1B,CDC25C,CREBBP,EGFR,GOLGA2,HSP90AA1,NEK2,PDGFRB,MAP2K1,PSMA1,PSMC3,RAD21,TOP2A,TUBA4A,UBE2I,TUBA1A,SMC3,CEP57,DLGAP5,OPTN,TUBB3,TUBB4A,TUBB4B,POGZ,TUBGCP4,CASC5,CEP70,CEP57L1	Mitotic cell cycle process	-4.695	ABL1,CAMK2D,CCNG1,FHL1,GEM,HSP90AA1,MAP2K1,PSME1,TERF1,TGFB1,KLF11,CCNA1,OIP5,KANK2,KLHL42,CEP70,ZNF830,APP,SMAD3,SRC,TERF2,GNB2L1,HIPK2,CDKL3,DNM1L	1
Note	Common proteins between the glioma and SCLC datasets
