# Supplementary material for: System analysis identifies distinct and common functional networks governed by transcription factor ASCL1, in glioma and small cell lung cancer
Source: Royal Society of Chemistry journal article supplement (doi:10.1039/c6mb00851h), 2017-05-18
Supplement: c6mb00851h1.zip [file c6mb00851h1.zip › Supplementary_Table_S14.xlsx]

## Sheet: GliomaGOTFs_TableS14A
Supplementary Table S14A: Downstream Transcription factor (TF) targets of prominent TFs regulated by ASCL1 in glioma dataset
NFIC target TFs	Number of TF Bindingsites NFIC	GO NFIC target TFs	GO log10pvalue (Glioma)	NFATC3 target TFs	Number of TF Bindingsites NFATC3	GO NFATC3 target TFs	GO log10pvalue (Glioma)	AHR target TFs	Number of TF Bindingsites AHR	GO AHR target TFs	GO log10pvalue (Glioma)	BARX1 target TFs	Number of TF Bindingsites BARX1	GO BARX1 target TFs	GO log10pvalue (Glioma)	ASCL1 target TFs	Number of TF Bindingsites ASCL1	GO ASCL1 target TFs	GO log10pvalue (Glioma)
BBX	4	negative regulation of transcription from RNA polymerase II promoter	-11.8756	DACH1	5	negative regulation of transcription from RNA polymerase II promoter	-10.6464	NFIC	7	negative regulation of transcription from RNA polymerase II promoter	-15.1101	SIX4	3	negative regulation of transcription from RNA polymerase II promoter	-7.3767	MXI1	3	embryonic skeletal system morphogenesis	-6.1212
HOXD10	4	organ morphogenesis	-5.825	NR4A2	3	organ morphogenesis	-6.92279	SMAD6	3	regionalization	-7.63	BNC2	3	organ morphogenesis	-3.9777	MAFF	2	negative regulation of transcription from RNA polymerase II promoter	-6.0963
BARX1	3	embryonic organ morphogenesis	-4.5153	TCF21	3	epithelial cell differentiation	-5.94513	BARX1	2	organ morphogenesis	-7.321	NFIA	2	embryonic organ morphogenesis	-3.2817	OSR1	2	regulation of embryonic development	-4.0254
DACH1	2	response to steroid hormone	-4.379	BBX	2	hematopoietic or lymphoid organ development	-4.11508	TSHZ1	2	response to laminar fluid shear stress	-6.0061	TSHZ1	1	negative regulation of transcription from RNA polymerase II promoter	-7.3767	IRX5	2	epidermis development	-2.8181
TSHZ1	2	cellular response to inorganic substance	-4.3279	VDR	2	developmental maturation	-2.80965	VDR	2	epidermis development	-5.3091	VDR	1	DNA replication	-3.1104	MXD3	2
RAD21	2	skeletal muscle tissue development	-4.2359	TCF12	2			TCF12	2	epithelial cell differentiation	-4.6973	HOXD10	1			NFATC3	1
IRX5	2	tube development	-3.9819	BARX1	2			MXD3	2	response to acid chemical	-4.0392	DACH1	1			BBX	1
MXD1	2	pattern specification process	-3.6183	GLI3	2			ZGPAT	2	hematopoietic or lymphoid organ development	-3.1171	MXD1	1			KLF4	1
NFATC3	2	digestive system development	-2.9882	TSHZ1	2			NFE2L2	2	developmental maturation	-2.3162	GLIS3	1			NFE2L2	1
NFIA	2	multi-multicellular organism process	-2.4835	RAD21	2			SATB1	2	protein import into nucleus	-2.1559	FOSB	1			NR4A2	1
FOXO1	2	DNA metabolic process	-2.1839	SIX4	1			BBX	1			ZNF93	1			BARX1	1
MAFF	2	negative regulation of protein phosphorylation	-1.9011	KLF4	1			HOXD10	1			NFIB	1			HOXD10	1
EBF1	2			TFAP2A	1			DACH1	1							ZGPAT	1
GLIS3	2			OSR1	1			RAD21	1							BNC1	1
FOSB	2			IRX5	1			IRX5	1							GLI3	1
TCF21	1			MXI1	1			MXD1	1							LMO2	1
VDR	1			LMO2	1			NFIA	1							ASCL1	1
TCF12	1			ASCL1	1			FOXO1	1
TFAP2A	1			MXD1	1			EBF1	1
AHR	1			FOXF1	1			GLIS3	1
GRHL1	1			STAG2	1			TFAP2A	1
MXD3	1							GRHL1	1
ZGPAT	1							TRPS1	1
ZNF93	1							GLI3	1
NFIB	1							KLF4	1
SMAD6	1							OSR1	1
TRPS1	1							MXI1	1
								LMO2	1
								ASCL1	1
								BNC1	1
								GLI1	1

## Sheet: SCLCGOTFS_TableS14B
Supplementary Table S14B: Downstream Transcription factor (TF) targets of prominent TFs regulated by ASCL1 in SCLC dataset
HIF1A target TFs	Number of TF Bindingsites HIF1A	GO HIF1A target TFs	GO log10pvalue (SCLC)	IRF2 target TFs	Number of TF Bindingsites IRF2	GO IRF2 target TFs	GO log10pvalue (SCLC)	NFIX target TFs	Number of TF Bindingsites NFIX	GO NFIX target TFs	GO log10pvalue (SCLC)	ASCL1 target TFs	Number of TF Bindingsites ASCL1	GO ASCL1 target TFs	GO log10pvalue (SCLC)	MYOG target TFs	Number of TF Bindingsites MYOG	GO MYOG target TFs	GO log10pvalue (SCLC)
NFIX	10	negative regulation of transcription from RNA polymerase II promoter	-16.4158	IRX3	6	negative regulation of transcription from RNA polymerase II promoter	-12.1468	PITX1	4	negative regulation of transcription from RNA polymerase II promoter	-12.1468	ERF	3	negative regulation of transcription from RNA polymerase II promoter	-6.0963	ATF5	3	positive regulation of transcription from RNA polymerase II promoter	-6.2228
CTBP2	5	positive regulation of transcription from RNA polymerase II promoter in response to endoplasmic reticulum	-6.41	RCOR1	4	tube development	-8.8484	RCOR1	4	striated muscle cell proliferation	-4.4481	ATF5	3	cell fate commitment	-4.4668	MXI1	3	embryo development	-4.2923
KCNH8	4	negative regulation of cell proliferation	-5.9952	ATF3	4	regulation of cell development	-6.4643	SIX5	3	embryonic morphogenesis	-4.1946	MXI1	3	embryo development	-3.2055	GATA6	2	negative regulation of cell proliferation	-4.1002
SIX5	3	hindbrain development	-4.4143	ZNF217	4	tube formation	-6.1256	MEIS3	3	negative regulation of cell proliferation	-3.9499	GATA6	2	blood vessel morphogenesis	-2.2066	SIX5	2
DDIT3	3	striated muscle cell proliferation	-4.3977	ZEB2	3	stem cell differentiation	-4.7452	DDIT3	2	negative regulation of neurogenesis	-3.7036	SIX5	2	developmental process involved in reproduction	-1.9192	HOXA1	1
GLIS2	3	positive regulation of cell differentiation	-4.2356	TGIF1	3	digestive tract development	-4.5729	GLIS2	2	negative regulation of sequence-specific DNA binding transcription factor activity	-3.1705	HOXA1	1			HOXB6	1
HIVEP2	3	regionalization	-4.2048	MEIS3	2	response to growth factor	-3.996	GATA6	2	regulation of transmembrane receptor protein serine/threonine kinase signaling pathway	-2.6052	HOXB6	1			ATF3	1
CEBPB	3	response to retinoic acid	-3.4657	SIM1	2	negative regulation of cell proliferation	-3.9499	IRF2	2	regulation of apoptotic signaling pathway	-1.9708	ATF3	1			HOXA13	1
IRF2	2	wound healing	-1.8775	HOXA13	2	wound healing	-2.7543	PBX1	2	forebrain development	-1.9647	HOXA13	1			GLIS2	1
ERF	2			ZNF189	2			SIM1	2	wound healing	-1.9353	GLIS2	1			CEBPB	1
ATF5	2			MXI1	2			ATF3	2	Wnt signaling pathway	-1.8138	CEBPB	1			HIF1A	1
ZHX2	2			HOXA1	2			ZNF217	2	sensory organ development	-1.5872	HIF1AN	1			ZNF217	1
MYOG	2			MYOG	2			ERF	1			ZNF217	1			ASCL1	1
SATB1	2			PBX1	1			HIVEP2	1			ASCL1	1			KCNH8	1
FOXN3	2			ZNF467	1			ATF5	1			KCNH8	1			TGFB1I1	1
ASCL1	2			HOXB6	1			KCNH8	1			TGFB1I1	1			ZNF80	1
RCOR1	1			HIF1A	1			TGFB1I1	1			ZNF80	1
GATA6	1			GATA6	1			ZHX2	1
ATF3	1			TGFB1I1	1			CTBP2	1
ZNF217	1			ZNF80	1			ZNF467	1
TGFB1I1	1			IRF2	1			MYOG	1
MXI1	1			ATF5	1			HOXA13	1
ZEB2	1			ZHX2	1			MXI1	1
AKNA	1			ASCL1	1			ZNF189	1
ZNF80	1			KCNH8	1			ZEB2	1
HOXA1	1			CTBP2	1			IRX3	1
TGIF1	1
